# Supplementary material for: Nucleophosmin integrates within the nucleolus via multi-modal interactions with proteins displaying R-rich linear motifs and rRNA
Source: eLife. 2016 Feb 2;5:e13571. doi: 10.7554/eLife.13571 (PMC4786410; doi:10.7554/eLife.13571)
Supplement: Supplementary file 1. — DOI: http://dx.doi.org/10.7554/eLife.13571.030 [file elife-13571-supp1.xlsx]

## Sheet: Sheet1
Predicted NoLS?	Shortest Linker	Gene	Length	# R's	% R's	R1	Residues	Linker	R2	Residues	Linker	R3	Residues	Linker	R4	Residues	Linker	R5	Residues	Linker	R6	Residues	Linker	R7	Residues	Linker	R8	Residues	Linker	R9	Residues	Linker	R10	Residues	Linker	R11	Residues	Linker	R12	Residues	Linker	R13	Residues	Linker	R14	Residues	Linker	R15	Residues
Y	3	SURF6	361	53	0.146814	RTR	29-31	24	RKR	56-58	22	RR	81-82	35	RQR	118-120	24	RRRR	145-148	3	RDRKKRKR	152-159	56	RR	216-217	3	RQR	221-223	10	RNYR	234-237	8	RQSR	246-249	49	RRAQRQRR	299-306	14	RQDRRR	321-326	3	RR	330-331	4	RAERRLLRAR	336-345
Y		DDX54	881	91	0.103292	RSR	12-14	12	RKRR	27-30	24	RAR	55-57	367	RVGRVARAGR	425-434	86	RSR	521-523	35	RLR	559-561	8	RSR	570-572	18	RAKR	591-594	60	RKRQR	655-659	8	RRR	668-670	3	RQR	674-676	48	RGR	725-727	62	RR	790-791	3	RR	795-796	3	RDR	800-802
Y		DDX21	783	43	0.054917	RKRGR	255-259	44	RMR	304-306	217	RSGRTGRAGR	524-533	167	RR	701-702	22	RGQR	725-728	3	RGFRGQR	732-738	3	RRFRGQR	742-748	3	RGPRGQR	752-758
Y		EPB41L5	733	37	0.0504775	RR	6-7	3	RRSMR	11-15	6	RLR	22-24	299	RLR	324-326	17	RFR	344-346	15	RR	362-363	5	RR	369-370	3	RYSRR	374-378
Y		FMR1	632	53	0.0838608	RLR	111-113	77	RSLR	190-193	121	RVR	315-317	153	RGSRPYRNR	471-479	3	RR	483-484	42	RR	527-528	3	RRR	532-534	9	RGR	544-546	15	RPRNPR	562-567	36	RLR	604-606
		RPL15	204	33	0.161765	RVR	24-26	11	RAPRPTR	38-44	4	RR	49-50	12	RIRVRRGGRKR	63-73	31	RAGR	105-108	34	RR	143-144	14	REMR	159-162	6	RKSR	169-172	15	RR	188-189	3	RRR	193-195	6	RYR	202-204
Y		PPAN	473	48	0.10148	RSR	6-8	3	RAR	12-14	26	RNIR	41-44	6	RR	51-52	73	RRHR	126-129	287	RKRKR	417-421	4	RGRGR	426-430	18	RRGPR	449-453	7	RGRGRGR	461-467
Y		MMTAG2	263	31	0.117871	RRKPR	166-170	38	RR	209-210	12	RPR	223-225	14	RRKR	240-243	5	RR	249-250	3	RR	254-255
Y		NOP2	812	52	0.0640394	RKAR	16-19	26	RARKR	46-50	3	RR	54-55	108	RAAR	164-167	93	RSR	261-263	56	RRR	320-322	212	RNVR	535-538	14	RFRERR	553-558	5	RSTRR	564-568	220	RSSR	789-792
Y		GLTSCR2	478	60	0.125523	RRRRRGPR	35-42	3	RGWRR	46-50	95	RR	146-147	15	REVRR	163-167	56	RPAR	224-227	114	RRR	342-344	5	RLR	350-352	6	RAARLR	359-364	5	RLR	370-372	14	RRQRRRQARR	387-396	7	RRLGR	404-408	30	RDR	439-441	5	RR	447-448	5	RER	454-456	14	RAFR	471-474
		MAK16	300	24	0.08	RR	74-76	3	RVR	80-82	20	RFIR	103-106	15	RIR	122-124	5	RQR	130-132	10	RREKRR	143-148	129	RKR	278-280
Y		GTPBP4	634	54	0.0851735	RIR	106-108	322	RR	431-432	15	RRKR	448-451	6	RKKRER	458-463	107	RMPR	571-574	33	RRSR	608-611	3	RKRKR	615-619	16	RTPR	636-639	57	RR	697-698
		POP7	140	15	0.107143	REPR	5-8	14	RKR	23-25	3	RLPRR	29-33	89	RIR	123-125	7	RVFR	133-136
Y		KRI1	703	60	0.0853485	RYNRYRER	19-26	211	RFLR	238-241	80	RR	322-323	3	RR	327-328	7	RERKKR	336-341	226	RDKR	568-571	77	RRR	649-651	19	RQR	671-673	17	RQRR	691-694
Y		DDX10	875	56	0.064	RLR	335-337	15	RR	353-354	8	RKR	363-365	36	RAGRTAR	402-408	58	RAQR	467-470	38	RVR	509-511	237	REKR	749-752	3	REARR	756-760
Y		GNL2	731	49	0.0670315	RDR	33-35	3	RR	39-40	8	RRNSR	49-53	70	RIR	124-126	23	RKR	150-152	202	RR	355-356	96	RGR	453-455	72	RVR	528-530	151	RRRAVRQQR	682-690	16	RNR	707-709
		RPL7L1	246	22	0.0894309	RFKR	51-48	9	RQKR	61-64	3	RLRR	68-71	20	RIER	92-95	13	RLR	109-111	122	RGER	234-237
Y		BRIX1	353	28	0.0793201	RKRR	6-9	34	RDR	44-46	26	RTR	73-75	190	RRVIR	266-270	61	RKKR	332-335	3	RQR	339-341
Y	4	RPL4	427	41	0.0960187	RIPRVR	75-80	16	RGGR	97-100	8	RRWHRR	109-114	73	RMR	188-190	6	RNRRRIQRR	197-205	94	RALRAPR	300-306	4	RR	311-312	23	RR	336-337	4	RQAR	342-345
		XRN2	950	72	0.0757895	RPRR	93-96	18	RSRRFR	115-120	13	RVR	134-136	76	RRQR	213-216	198	RRR	415-417	4	RKRMKR	422-427	107	RR	535-536	119	RRLR	656-659	15	RR	675-676	126	RDRR	803-806	73	RFDR	880-883	37	RRDDRGGR	921-928	4	REGR	933-936
		SPTY2D1	685	58	0.0846715	RR	56-57	6	RR	64-65	137	RER	203-205	4	RKHRR	210-214	183	RR	398-399	26	RR	426-427	48	RR	476-477	105	RQR	583-585	82	RR	668-669	6	RRR	676-678	5	RR	684-685
		RRS1	365	41	0.112329	RLPR	98-101	5	RPR	107-109	31	RRR	141-143	4	RAR	148-150	38	RLR	189-191	111	RR	303-304	58	RR	363-364
Y		RPS8	208	23	0.110577	RR	11-12	28	RR	41-42	4	RVR	47-49	6	RALR	56-59	14	RKTR	74-77
		GAR1	217	25	0.115207	RGGR	173-176	17	RGGR	194-197	7	RGGR	205-208	4	RGR	213-215
Y		RPL13	311	31	0.0996785	RR	20-21	9	RKIRRRKAR	31-39	4	RR	44-45	25	RAGR	71-74	26	RRR	101-103	79	RMAR	183-186	8	RAKR	195-198
Y		RRP8	456	36	0.0789474	RR	37-38	93	RKR	132-134	54	RNR	189-191	4	RR	196-197	41	RAR	239-241	8	RFR	250-252	45	RIARDLRQR	298-306	148	RR	455-456
Y		RPL23A	156	11	0.0705128	RR	47-48	4	RLRR	53-56	10	RR	67-68
		RPF1	349	30	0.0859599	RR	62-63	91	RTVR	155-158	16	RR	175-176	50	RLR	227-229	4	RR	234-235	55	RFHR	291-294	49	RR	344-345
Y		LARP1	1096	83	0.0757299	RRPR	54-57	55	RR	113-114	156	RPTR	271-274	63	RGRGRGRGRGRGRGR	338-352	74	RR	427-428	46	RRR	475-477	85	RPR	563-565	88	RR	654-655	122	RNTRTPRTPR	778-787	28	RKRKTR	816-821	17	REHRPR	839-844	49	RRR	894-896	4	RKR	901-903	115	RR	1019-1020	30	RKR	1051-1053
Y		RRP1B	758	52	0.0686016	RDR	24-26	84	RLR	111-113	143	RR	257-258	22	RGR	281-283	37	RKR	321-323	75	RRR	399-401	25	RGR	427-429	42	RKRPR	472-476	4	RAHR	481-484	38	RKR	523-525	41	RRR	567-569	87	RR	657-658	90	RRRPR	749-753
Y		ILF3	894	39	0.0436242	RMPR	2-5	81	RTLR	87-90	140	RVLR	231-234	38	RR	273-274	33	RQQR	308-311	224	RR	536-537	102	RGRGR	640-644	4	RGRGRGR	649-655
Y		RPS26	115	16	0.13913	RR	5-6	78	RNRSREARKDR	85-95	4	RFR	100-102
Y		LLPH	129	11	0.0852713	RKMR	11-14	85	RQRKR	100-104	4	REKR	109-112
Y	5	WHSC1	1365	87	0.0637363	RRNRKR	166-171	227	RRRR	399-402	29	RR	432-433	16	RSR	450-452	46	RAR	499-501	44	RKRLR	546-550	6	RKR	557-559	40	RNR	600-602	96	RR	699-700	54	RGFR	755-758	25	RCVR	784-787	156	RGSR	944-947	20	RFR	968-970	5	REAR	976-979	101	RDIR	1081-1084
Y		RPL19	196	31	0.158163	RARCR	60-64	5	RRKGR	70-74	22	RRMRILRRLLRRYR	97-110	51	RR	162-163	6	RKRREER	170-176
Y		NOL12	213	30	0.140845	RRPR	14-17	9	RRALRR	27-28	29	RKLREER	58-64	85	RKSR	150-153	28	RR	182-183	8	RAPR	192-195	5	RRR	201-203
		NCL	710	26	0.0366197	RDAR	390-393	157	RAIR	551-554	42	RAR	597-599	70	RGGR	670-673	5	RGR	679-681	9	RGGR	691-694
		FYTTD1	318	36	0.113208	RLNRR	52-56	10	RMRVR	67-71	15	RRGR	87-90	5	RR	96-97	99	RR	194-195	20	RTRQWR	216-221	27	RLTR	249-252
Y		MKI67	3256	196	0.0601966	RR	5-6	86	RSFR	93-96	16	RKIR	113-116	5	RRVSR	122-126	63	RNGR	190-193	96	RKSR	290-293	77	RR	371-372	25	RNR	398-400	102	RRR	503-505	89	RRR	595-597	18	RGGR	616-619	26	RR	646-647	40	RQRR	688-691	40	RPYR	732-735	95	RR	831-832
Y		GLYR1	553	27	0.0488246	RR	91-92	17	RR	110-111	5	RSR	117-119	49	RKRGR	169-173	138	RLGR	312-315	62	RGGR	378-381
Y	6	CENPC1	943	60	0.0636267	RRRFCRPSRAR	14-24	221	RIR	246-248	95	RKSR	344-347	64	RSKR	412-415	6	RR	422-423	97	RRISRR	521-526	108	RSTR	635-638	99	RRTKRTR	738-744	7	RGER	752-755
		TEX10	929	50	0.0538213	RKR	5-7	193	RDR	202-204	11	RR	216-217	26	RLR	244-246	49	RLR	296-298	238	RSCRFRYR	537-544	90	RLSR	635-638	181	RKR	820-822	15	RVLR	838-841	6	RVNR	848-851
Y		NVL	856	58	0.067757	RRKR	49-52	33	RAR	86-88	293	RR	382-383	37	RRAGRFDR	421-428	11	RER	440-442	6	RKLR	449-452	208	RAVR	661-664	24	RRSDR	689-693	42	RPGR	736-739
Y		ZNF800	664	37	0.0557229	RRGVRRHIR	242-250	52	RR	303-304	6	RGLRR	311-315	213	RRKR	529-532	123	RSTR	656-659
Y		C3orf17	567	31	0.0546737	RVR	14-16	58	RMGR	75-78	281	RFR	360-362	79	RQRR	442-445	6	RRQR	452-455
		HNRNPCL1	293	13	0.0443686	RQR	145-147	6	RR	154-155
Y	7	POP1	1024	71	0.0693359	RQRQTR	55-60	76	RHMRRR	137-142	7	RLPRR	150-154	27	RR	182-183	10	RR	194-195	188	RKR	384-386	44	RFR	431-433	140	RMR	574-576	60	RGVR	637-640	45	RR	686-687	51	RR	739-740	66	RSR	807-809	17	RGGRR	827-831	85	REKR	917-920	95	RFAR	1016-1019
		RBM28	759	45	0.0592885	RER	466-468	17	RTR	486-488	34	RVMR	523-526	55	RR	582-583	7	RIQR	591-594	72	RR	667-668	13	RLR	682-684
		LYAR	379	19	0.0501319	RER	189-191	7	RKR	199-201	69	RKRR	271-274
Y	8	BUD13	619	76	0.122779	RKRRKKR	32-38	78	RHFR	117-120	8	RRVR	129-132	8	RDKR	141-144	8	RRAR	153-156	9	RGAR	166-169	8	RRIR	178-181	9	RRAR	191-194	9	RR	204-205	10	RRVR	216-219	9	RRAR	229-232	9	RR	242-243	9	RR	253-254	10	RRAR	265-268	9	RNRPRHR	378-384
Y		RPL7	248	27	0.108871	RR	22-23	8	RLR	32-34	8	RKARR	43-47	22	RMARMAR	70-76	17	RIR	94-96	16	RLR	113-115	126	RLIRR	242-246
Y		ZNF668	619	58	0.0936995	RSGRR	17-21	14	RAAR	36-39	79	RR	119-120	63	RKHRR	184-188	95	RCGR	284-287	8	RRHQR	296-300	26	RR	327-328	33	RPFR	362-365	46	RTHR	412-415	116	RRHER	532-536
Y		DDX51	666	58	0.0870871	RAR	30-32	8	RARER	41-45	19	RRRRRPRRRRR	65-75	15	RR	91-92	96	RR	189-190	216	RR	407-408	135	RR	544-545	46	RVGRTAR	592-598	16	RRFLR	615-619	41	RKQR	661-664
Y		RPS9	194	27	0.139175	RR	17-18	19	RNKR	38-41	27	RR	69-70	8	RRLVR	79-83	24	RR	108-109	21	RQRHIRVR	131-138	30	RPGRVKR	169-175
Y		NOP16	178	21	0.117978	RR	9-10	8	RKRLNRNARR	19-28	40	RKR	69-71
		RPL26L1	145	16	0.110345	RKR	15-17	8	RR	26-27	56	RVQR	84-87
Y		RPL5	297	24	0.0808081	RRRR	21-24	8	RKR	33-35	71	RR	107-108	156	RWNR	265-268
		RPP25	199	15	0.0753769	RKVR	5-8	77	RR	86-87	8	RLRYRSVR	96-103
		HIST1H2AG	130	12	0.0923077	RSSR	18-21	8	RVHRLLR	30-36
		H2AFX	143	12	0.0839161	RSSR	18-21	8	RVHRLLR	30-36
Y	9	FTSJ3	847	68	0.0802834	RR	11-12	12	RSR	25-27	9	RR	37-38	58	RCR	97-99	60	RSR	160-162	13	RR	176-177	138	RR	316-317	74	REQRKQRER	392-400	91	RMR	492-494	63	RRKGR	558-562	75	RSR	638-640	72	RIR	713-715	12	RKRWR	728-732	15	RKKRR	748-752	56	RKVRR	809-813
Y		USP36	1121	74	0.0660125	RR	82-83	29	RWERVFR	113-119	79	RHFR	199-202	47	RSR	250-252	354	RR	607-608	128	RAR	737-739	104	RKR	844-846	28	RR	875-876	9	RR	886-887	25	RKRRR	913-917	141	RQAR	1059-1062	24	REKRR	1087-1091	10	RR	1102-1103	16	RR	1120-1121
Y		RBM34	430	32	0.0744186	RKRKR	9-13	201	RFR	215-217	54	RIR	272-274	9	RDKR	284-287	29	RIVR	317-320	34	RKLRVMR	355-361
Y	10	NOC3L	800	44	0.055	RR	4-5	41	RKLR	47-50	24	RIER	75-78	380	RMQR	459-462	10	RELR	473-476	137	RRQR	614-615	81	RR	697-698	30	RR	729-730
Y		RPS24	133	13	0.0977444	RTR	8-10	79	RLAR	90-93	10	RKQRKERKNR	104-113
Y	11	DDX56	547	43	0.0786106	RAR	50-52	58	RDVR	111-114	155	RSYRLR	270-275	19	RSR	295-297	30	RRGR	328-331	338	RAGRTAR	372-378	48	RYRCR	427-431	11	REAR	443-446
		MRPL43	215	19	0.0883721	RGAR	41-44	11	RR	56-57	56	RIR	114-116	24	RGLRPR	141-146
Y		DDX27	796	62	0.0778894	RRR	6-8	60	RR	69-70	54	RKKR	125-128	312	RIR	441-443	63	RR	507-508	41	RVGRTARAGRAGR	550-562	154	RNRRAKRAR	717-725	55	RR	781-782	11	RR	794-795
Y		URB1	2271	112	0.0493175	RAR	24-26	118	RLAR	145-148	705	RFNR	854-857	104	RR	962-963	126	RR	1090-1091	133	RR	1225-1226	52	RTR	1279-1281	97	RR	1379-1380	218	RDR	1599-1601	11	RR	1613-1614	192	RR	1807-1808	142	RYR	1951-1953	76	RGRKRR	2030-2035
Y	12	MYBBP1A	1328	84	0.063253	RGR	62-64	328	RVVR	393-396	50	RLR	447-449	183	RRSR	633-636	77	RR	714-715	91	RR	807-808	12	RR	821-822	34	RRSLR	857-861	23	RARR	885-888	136	RPR	1025-1027	13	REVR	1041-1044	136	RKKR	1181-1184	25	RKKRNR	1210-1215
Y		DNTTIP2	756	41	0.0542328	RSAR	5-8	56	RKRKSR	65-70	34	RVTRRR	105-110	53	RR	164-165	35	RRTR	201-204	428	RRKER	633-637	72	RKR	710-712	12	RRYNRR	725-730
Y		PES1	588	43	0.0731293	RR	35-36	53	RKLR	90-93	68	RR	162-163	12	RALR	176-179	133	RR	313-314	241	RRKIR	556-560
Y		POP4	220	17	0.0772727	RHKR	63-66	12	RQRRELR	79-85
	13	RPL8	257	28	0.108949	RVIRGQR	3-9	18	RLR	28-30	167	RVR	198-200	25	RR	226-227	13	RRTGRLR	241-247
Y		HJURP	748	66	0.0882353	RASRRRRFQRRMQR	23-35	111	RR	147-148	21	RAGRDVR	170-176	19	RISR	196-199	66	RRRHR	296-300	13	RRSQR	314-318	84	RFR	403-405	24	RQR	430-432	21	RR	454-455	27	RR	483-484	89	RNR	574-576	105	RPR	682-684
Y		SDAD1	687	37	0.0538574	RR	189-190	475	RSFR	666-669	13	RKR	683-685
Y	14	RPL3L	407	33	0.0810811	RSHRHR	21-26	70	RGLR	97-100	14	RRR	115-117	18	RWR	136-138	147	RIGR	286-289
Y		RPL6	288	22	0.0763889	RYSR	56-59	78	RKLR	138-141	14	RHRGKR	156-161	25	RR	187-188	34	RKPR	223-226
Y		RPL35	123	15	0.121951	RDLR	7-10	37	RVVR	48-51	37	RAMRRR	89-94	14	RKER	109-112
Y		RPF2	306	21	0.0686275	RAKR	14-17	139	RR	157-158	49	RTPR	208-211	14	RR	226-227
Y		ZNF22	224	20	0.0892857	RQR	28-30	14	RLRR	45-48	53	RR	102-103	91	RKTR	195-198
Y		MRPS5	430	35	0.0813953	RGKR	114-117	71	RER	189-191	105	RFKR	297-300	14	RCHR	315-318
Y		HNRNPM	730	54	0.0739726	RYR	70-72	81	RR	154-155	551	RACR	707-710	14	RIDR	725-728
		RPS13	151	14	0.0927152	RR	19-20	83	RNR	104-106	14	RIHR
	15	SENP5	755	44	0.0582781	RQLR	52-55	100	RPR	156-158	64	RR	223-224	15	RFRYRILR	240-247	31	RR	279-280	271	RAR	552-554	184	RVRKR	739-743
Y		RPL3	403	30	0.0744417	RKRSSRHR	19-26	70	RGLR	97-100	15	RR	116-117	80	RER	198-200	45	RGLR	246-249	107	RR	357-358
Y		MPHOSPH10	681	27	0.0396476	RRR	7-9	422	RIR	432-434	141	RERR	576-579	15	RR	595-596
Y	16	NOC2L	749	54	0.0720961	RKRR	7-10	30	REAR	41-44	16	RRKGR	61-65	69	RVPR	135-138	180	RVCR	319-322	264	RRQR	587-590	32	RKLRDR	623-628	21	RR	650-651
Y		DDX31	851	63	0.0740306	REGRR	28-32	47	RVPR	80-83	38	RRVR	122-123	26	RR	150-151	200	RLR	352-354	26	RLR	381-383	194	RR	578-579	35	RIGRTAR	615-621	65	RER	687-689	16	RR	706-707	53	RKKR	761-764
Y		MKI67IP	293	24	0.0819113	RKR	30-32	40	RFRLSRSKR	73-81	66	RYNRNR	148-153	16	RLLR	170-173	70	RR	244-245	38	RKKRRR	284-289
Y	17	RPL18A	176	21	0.119318	RMR	29-31	63	REYR	95-99	17	RHRAR	116-120	17	RR	138-139	17	RVLRR	157-161
	18	RPL14	215	13	0.0604651	RR	4-5	40	RR	46-47	50	RER	98-100	18	RNR	119-121
	19	RPP40	363	12	0.0330579	RRLR	5-8	19	RHR	28-30
Y	20	GZF1	711	44	0.0618847	RVQR	105-108	111	RR	220-221	20	RRLR	242-245	160	RHR	406-408	155	RHRR	564-567	23	RRSR	591-592
		DHX33	707	48	0.0678925	RFR	12-14	34	RR	49-50	20	RR	71-72	55	RR	128-129	86	RR	216-217	184	RTGRAGR	402-408	132	RR	541-542	78	RR	621-622	76	RRKLRTAR	699-706
		CENPV	275	21	0.0763636	RRSR	2-5	35	RTRR	41-44	20	RLRR	65-68	46	RER	115-117
Y		RPL13A	203	22	0.108374	RKR	59-61	20	RTVR	82-85	90	RLR	176-178
Y		RPL12	165	10	0.0606061	RDR	90-92	21	RQMRHR	114-119
Y		DDX24	859	43	0.0500582	RR	436-437	22	RNLRQLR	460-466	159	RLR	626-628	45	RSGRTAR	674-680	47	RIRLAR	728-733	45	RRR	779-781
Y		RSL24D1	163	14	0.0858896	RNPRKVR	44-50	23	RR	74-75
		PELP1	1130	47	0.0415929	RLR	32-34	277	RQR	312-314	75	RLLR	390-393	82	RSPR	476-479	66	RR	546-547	26	RCRR	574-577	181	RVPR	759-762
		RPL36AL	106	12	0.113208	RR	8-9	28	RRRYDR	38-43	34	RSKR	78-81
		PAPD5	572	33	0.0576923	RR	41-42	36	RKR	79-81	28	RR	110-111	301	RIIR	413-416	102	RLFR	519-522
Y		GNL3	549	30	0.0546448	RKLR	30-33	33	RKQR	67-70	300	RR	371-372	103	RKER	476-479
		RPL37A	92	7	0.076087	RR	49-50	33	RR	84-85
Y		RPP25L	163	19	0.116564	RVR	29-31	44	RR	76-77	33	RRVR	111-112	40	RSRRRARDTR	153-159
		RPL7A	266	23	0.0864662	RYIRLQRQR	59-67	121	RLGR	189-192	41	RR	234-235
		HP1BP3	553	29	0.0524412	RR	42-43	154	RR	198-199	42	RNRKNR	242-247	207	RR	455-456
		POP5	163	16	0.0981595	RCR	19-21	46	RCR	68-70	48	RR	119-120
Y		RSL1D1	490	30	0.0612245	RVR	79-81	78	RIRR	160-163	124	RRKRRER	288-294	53	RGR	348-350
		RPL27	136	13	0.0955882	RYPR	48-51	56	RKARR	108-112
		SCML1	329	16	0.0486322	RR	83-84	60	RR	145-146
Y		RPL17	184	15	0.0815217	RR	61-62	63	RRRTYR	126-131
		MYEF2	600	36	0.06	RR	30-31	67	RNR	99-101	81	RR	183-184	330	RER	515-517	77	RLDR	595-598
		MINA	465	24	0.0516129	RIGR	216-219	86	RR	306-307
		NMNAT1	279	16	0.0573477	RPGRKR	122-127	99	RRALRR	227-232
Y		LIN28B	250	15	0.06	RR	112-113	103	RSGR	217-220
Y		RPP38	283	20	0.0706714	RKTR	14-17	108	RR	126-127
		DDX18	670	32	0.0477612	RQR	21-23	333	RR	357-358	153	RVGRTAR	512-518
Y		NSA2	260	19	0.0730769	RKR	11-13	155	RFIR	169-172
Y		ZFP62	900	52	0.0577778	RR	468-469	166	RR	636-637	257	RMR	895-897
Y		REXO4	422	25	0.0592417	RR	140-141	264	RDRR	406-409
Y		KIAA0020	648	31	0.0478395	RR	146-147	330	RRR	478-480
		ASH2L	628	22	0.0350318	RQR	211-213	407	RR	621-622
		NPM3	178	9	0.0505618	RTR	17-19
		RPL10A	217	11	0.0506912	RKRR	23-26
		RPLP0	317	13	0.0410095	RDER	3-6
Y		RPS3A	264	14	0.0530303	RQIR	162-165
		NIP7	180	9	0.05
		NPM1	294	8	0.0272109
		RPLP2	115	2	0.0173913
		RPP14	124	4	0.0322581
[truncated: 117 more columns]
