# Supplementary material for: Nucleophosmin integrates within the nucleolus via multi-modal interactions with proteins displaying R-rich linear motifs and rRNA
Source: eLife. 2016 Feb 2;5:e13571. doi: 10.7554/eLife.13571 (PMC4786410; doi:10.7554/eLife.13571)
Supplement: Supplementary file 2. — DOI: http://dx.doi.org/10.7554/eLife.13571.031 [file elife-13571-supp2.xlsx]

## Sheet: functional_annotation_chart
GO Term Category	Term	Count	%	PValue	Genes	List Total	Pop Hits	Pop Total	Fold Enrichment	Bonferroni	Benjamini	FDR			Nature Protocols 2009; 4(1):44 & Nucleic Acids Res. 2009;37(1):1
Cellular Component	GO:0043232~intracellular non-membrane-bounded organelle	104	78.7879	9.59798e-68	RPP38, RPL17, RPL19, RPL14, RPL13, SURF6, RPL15, RPLP2, MAK16, RPLP0, DDX24, RPL26L1, DHX33, DDX21, H2AFX, RPL12, GNL2, GNL3, RPL36AL, GTPBP4, FMR1, RRP8, NVL, RSL1D1, NOP2, RPS13, DDX31, MYBBP1A, XRN2, MRPL43, SDAD1, NOC3L, MYEF2, RPS26, HNRNPM, RPL7, RPL6, CENPC1, NPM1, BRIX1, RPL8, RPL3, NPM3, RPL5, RPL10A, RPL7A, RPL4, RPS24, MKI67, MPHOSPH10, RPS9, RPL23A, RPF2, RPF1, RPS8, DDX56, RPL18A, NO…	107	2596	12782	4.78568	9.40602e-66	9.40602e-66	1.06126e-64
Cellular Component	GO:0043228~non-membrane-bounded organelle	104	78.7879	9.59798e-68	RPP38, RPL17, RPL19, RPL14, RPL13, SURF6, RPL15, RPLP2, MAK16, RPLP0, DDX24, RPL26L1, DHX33, DDX21, H2AFX, RPL12, GNL2, GNL3, RPL36AL, GTPBP4, FMR1, RRP8, NVL, RSL1D1, NOP2, RPS13, DDX31, MYBBP1A, XRN2, MRPL43, SDAD1, NOC3L, MYEF2, RPS26, HNRNPM, RPL7, RPL6, CENPC1, NPM1, BRIX1, RPL8, RPL3, NPM3, RPL5, RPL10A, RPL7A, RPL4, RPS24, MKI67, MPHOSPH10, RPS9, RPL23A, RPF2, RPF1, RPS8, DDX56, RPL18A, NO…	107	2596	12782	4.78568	9.40602e-66	9.40602e-66	1.06126e-64
Cellular Component	GO:0070013~intracellular organelle lumen	73	55.303	2.89489e-37	RPP38, GAR1, SURF6, LYAR, MKI67IP, SENP5, MAK16, RRP1B, ASH2L, RPS3A, URB1, DDX24, DHX33, H2AFX, DDX21, GNL2, FTSJ3, GNL3, GTPBP4, NIP7, FMR1, RRP8, NCL, NOC2L, RSL1D1, NVL, NOP2, DDX31, RPS13, MYBBP1A, MRPL43, XRN2, NOL12, GLTSCR2, RBM34, SDAD1, NOC3L, RPL35, MYEF2, MINA, HNRNPM, KIAA0020, REXO4, HJURP, NPM1, BRIX1, RPL3, NPM3, USP36, RPL5, RSL24D1, RBM28, NSA2, MKI67, PPAN-P2RY11, MPHOSPH10, RP…	107	1779	12782	4.90187	2.83699e-35	4.72832e-36	3.20091e-34
Cellular Component	GO:0043233~organelle lumen	73	55.303	1.35937e-36	RPP38, GAR1, SURF6, LYAR, MKI67IP, SENP5, MAK16, RRP1B, ASH2L, RPS3A, URB1, DDX24, DHX33, H2AFX, DDX21, GNL2, FTSJ3, GNL3, GTPBP4, NIP7, FMR1, RRP8, NCL, NOC2L, RSL1D1, NVL, NOP2, DDX31, RPS13, MYBBP1A, MRPL43, XRN2, NOL12, GLTSCR2, RBM34, SDAD1, NOC3L, RPL35, MYEF2, MINA, HNRNPM, KIAA0020, REXO4, HJURP, NPM1, BRIX1, RPL3, NPM3, USP36, RPL5, RSL24D1, RBM28, NSA2, MKI67, PPAN-P2RY11, MPHOSPH10, RP…	107	1820	12782	4.79145	1.33218e-34	1.90311e-35	1.50307e-33
Cellular Component	GO:0031974~membrane-enclosed lumen	73	55.303	5.12048e-36	RPP38, GAR1, SURF6, LYAR, MKI67IP, SENP5, MAK16, RRP1B, ASH2L, RPS3A, URB1, DDX24, DHX33, H2AFX, DDX21, GNL2, FTSJ3, GNL3, GTPBP4, NIP7, FMR1, RRP8, NCL, NOC2L, RSL1D1, NVL, NOP2, DDX31, RPS13, MYBBP1A, MRPL43, XRN2, NOL12, GLTSCR2, RBM34, SDAD1, NOC3L, RPL35, MYEF2, MINA, HNRNPM, KIAA0020, REXO4, HJURP, NPM1, BRIX1, RPL3, NPM3, USP36, RPL5, RSL24D1, RBM28, NSA2, MKI67, PPAN-P2RY11, MPHOSPH10, RP…	107	1856	12782	4.69851	5.01807e-34	6.27259e-35	5.66177e-33
Cellular Component	GO:0031981~nuclear lumen	72	54.5455	3.8362e-42	RPP38, GAR1, SURF6, LYAR, MKI67IP, SENP5, MAK16, RRP1B, ASH2L, RPS3A, URB1, DDX24, DHX33, H2AFX, DDX21, GNL2, FTSJ3, GNL3, GTPBP4, NIP7, FMR1, RRP8, NCL, NOC2L, RSL1D1, NVL, NOP2, RPS13, DDX31, MYBBP1A, XRN2, NOL12, GLTSCR2, RBM34, SDAD1, NOC3L, RPL35, MYEF2, MINA, HNRNPM, KIAA0020, REXO4, HJURP, NPM1, BRIX1, RPL3, NPM3, USP36, RPL5, RSL24D1, RBM28, NSA2, MKI67, PPAN-P2RY11, MPHOSPH10, RPS9, ILF3…	107	1450	12782	5.9317	3.75948e-40	9.39869e-41	4.24173e-39
Cellular Component	GO:0005730~nucleolus	70	53.0303	2.04796e-61	RPP38, GAR1, SURF6, LYAR, MKI67IP, SENP5, MAK16, RRP1B, RPS3A, URB1, DDX24, DHX33, DDX21, GNL2, FTSJ3, GNL3, GTPBP4, NIP7, FMR1, RRP8, NCL, NOC2L, RSL1D1, NVL, NOP2, RPS13, DDX31, MYBBP1A, XRN2, NOL12, GLTSCR2, RBM34, SDAD1, NOC3L, RPL35, MYEF2, MINA, HNRNPM, KIAA0020, REXO4, HJURP, NPM1, BRIX1, RPL3, NPM3, USP36, RPL5, RSL24D1, RBM28, NSA2, MKI67, PPAN-P2RY11, MPHOSPH10, RPS9, ILF3, RPF2, ZNF22,…	107	698	12782	11.98	2.007e-59	1.0035e-59	2.26445e-58
Molecular Function	GO:0003723~RNA binding	55	41.6667	4.9325e-41	RPL19, RPL14, GAR1, SURF6, RPL13, RPL15, RPLP2, MKI67IP, LARP1, DDX18, RPS3A, RPLP0, DDX24, HNRNPCL1, DDX21, RPL12, DDX10, RPP25, NIP7, FMR1, MRPS5, NCL, RSL1D1, NOP2, RPL3L, RPS13, DDX31, NOL12, RBM34, RPL35, MYEF2, LIN28B, RPP14, HNRNPM, RPS26, KIAA0020, RPL7, RPL6, RPL8, NPM1, RPL3, RPL5, RPL10A, RPL7A, RPL4, RBM28, RPS9, RPL23A, ILF3, RPF1, DDX56, RPL18A, POP4, DDX54, DDX51	103	718	12983	9.65553	5.5244e-39	2.7622e-39	5.59138e-38
Cellular Component	GO:0030529~ribonucleoprotein complex	54	40.9091	7.31051e-46	RPP38, RPL17, RPL19, RPL14, GAR1, RPL13, RPL15, RPLP2, RRP1B, RPS3A, RPLP0, HNRNPCL1, RPL26L1, RPL12, RPL36AL, FMR1, MRPS5, NCL, RSL1D1, RPL3L, RPS13, MRPL43, RPL35, HNRNPM, RPS26, RPL7, RPL6, RPL8, NPM1, RPL3, RPL5, RPL10A, RPL7A, RSL24D1, RPL4, RBM28, NSA2, RPS24, MPHOSPH10, RPS9, RPL27, RPL23A, ILF3, RPS8, RPL18A, RPL13A, RPL7L1, POP1, RPL37A, POP4, PES1, POP5, POP7, RPP40	107	515	12782	12.5257	7.1643e-44	2.3881e-44	8.08331e-43
Cellular Component	GO:0005840~ribosome	38	28.7879	1.63955e-39	RPL17, RPL19, RPL14, RPL13, RPL15, RPL35, RPLP2, RPS26, RPL7, RPL6, RPS3A, RPLP0, RPL8, NPM1, RPL3, RPL26L1, RPL5, RPL12, RSL24D1, RPL7A, RPL10A, RPL4, RPL36AL, RPS24, FMR1, MRPS5, RPL27, RPS9, RPL23A, RPS8, RSL1D1, RPL18A, RPL13A, RPL7L1, RPL3L, RPS13, RPL37A, MRPL43	107	215	12782	21.1135	1.60676e-37	3.21351e-38	1.81287e-36
Molecular Function	GO:0003735~structural constituent of ribosome	36	27.2727	2.43999e-41	RPL17, RPL19, RPL14, RPL13, RPL15, RPL35, RPLP2, RPS26, RPL7, RPL6, RPS3A, RPLP0, RPL8, RPL3, RPL26L1, RPL5, RPL12, RSL24D1, RPL7A, RPL10A, RPL4, RPL36AL, RPS24, MRPS5, RPS9, RPL27, RPL23A, RPS8, RSL1D1, RPL18A, RPL13A, RPL7L1, RPL3L, RPS13, RPL37A, MRPL43	103	168	12983	27.0104	2.73279e-39	2.73279e-39	2.76592e-38
Biological Procoess	GO:0006412~translation	36	27.2727	2.49733e-31	RPL17, RPL19, RPL14, RPL13, RPL15, RPL35, RPLP2, RPS26, RPL7, RPL6, RPS3A, RPLP0, RPL8, RPL3, RPL26L1, RPL5, RPL12, RSL24D1, RPL7A, RPL10A, RPL4, RPL36AL, RPS24, MRPS5, RPS9, RPL27, RPL23A, RPS8, RSL1D1, RPL18A, RPL13A, RPL7L1, RPL3L, RPS13, RPL37A, MRPL43	102	331	13528	14.4247	9.66468e-29	3.22156e-29	3.46654e-28
Molecular Function	GO:0005198~structural molecule activity	36	27.2727	5.42777e-21	RPL17, RPL19, RPL14, RPL13, RPL15, RPL35, RPLP2, RPS26, RPL7, RPL6, RPS3A, RPLP0, RPL8, RPL3, RPL26L1, RPL5, RPL12, RSL24D1, RPL7A, RPL10A, RPL4, RPL36AL, RPS24, MRPS5, RPS9, RPL27, RPL23A, RPS8, RSL1D1, RPL18A, RPL13A, RPL7L1, RPL3L, RPS13, RPL37A, MRPL43	103	634	12983	7.15733	6.0791e-19	2.02637e-19	6.1528e-18
Biological Procoess	GO:0006396~RNA processing	32	24.2424	1.74107e-19	RPP38, RPL14, GAR1, LIN28B, RPP14, HNRNPM, RRP1B, RPL7, NPM3, RPL5, RPL10A, RBM28, FTSJ3, NSA2, RPS24, RPP25, PPAN-P2RY11, MPHOSPH10, RRP8, RPF1, RSL1D1, DDX56, NOP2, POP1, POP4, PES1, POP5, DDX54, POP7, XRN2, RPP40, DDX51	102	547	13528	7.75883	6.73795e-17	9.62564e-18	2.41678e-16
Cellular Component	GO:0005829~cytosol	32	24.2424	5.8837e-08	RPL17, RPL19, RPL14, RPL13, RPL15, RPL35, RPLP2, RPS26, RRP1B, RPL7, RPL6, RPS3A, RPLP0, RPL8, NPM1, RPL3, RPL26L1, RPL5, RPL12, RPL4, RPL7A, RPL10A, RPS24, RPS9, RPL27, RPL23A, RPS8, RPL18A, RPL13A, RPL3L, RPS13, RPL37A	107	1330	12782	2.87418	5.76601e-06	3.60377e-07	6.50567e-05
Biological Procoess	GO:0006414~translational elongation	30	22.7273	2.93574e-39	RPL17, RPL19, RPL14, RPL13, RPL15, RPL35, RPLP2, RPS26, RPL7, RPL6, RPS3A, RPLP0, RPL8, RPL26L1, RPL3, RPL5, RPL12, RPL4, RPL7A, RPL10A, RPS24, RPS9, RPL27, RPL23A, RPS8, RPL18A, RPL13A, RPL3L, RPS13, RPL37A	102	101	13528	39.3943	1.13613e-36	1.13613e-36	4.0751e-36
Biological Procoess	GO:0042254~ribosome biogenesis	29	21.9697	8.19434e-35	SDAD1, RPL14, SURF6, GAR1, MINA, RRP1B, RPL7, RPLP0, NPM1, BRIX1, NPM3, RPL5, RSL24D1, RPL7A, GNL2, FTSJ3, NSA2, RPS24, GTPBP4, NIP7, MPHOSPH10, RRP8, RPF1, DDX56, NOP2, RRS1, POP4, PES1, DDX51	102	122	13528	31.5262	3.17121e-32	1.5856e-32	1.13745e-31
Biological Procoess	GO:0022613~ribonucleoprotein complex biogenesis	29	21.9697	1.00641e-29	SDAD1, RPL14, SURF6, GAR1, MINA, RRP1B, RPL7, RPLP0, NPM1, BRIX1, NPM3, RPL5, RSL24D1, RPL7A, GNL2, FTSJ3, NSA2, RPS24, GTPBP4, NIP7, MPHOSPH10, RRP8, RPF1, DDX56, NOP2, RRS1, POP4, PES1, DDX51	102	180	13528	21.3678	3.89482e-27	9.73706e-28	1.397e-26
Cellular Component	GO:0033279~ribosomal subunit	26	19.697	5.68826e-28	RPL17, RPL19, RPL14, RPL35, RPLP2, RPS26, RPL7, RPS3A, RPL6, RPLP0, RPL8, NPM1, RPL26L1, RPL3, RPL5, RPL4, RPL7A, RPS24, RPS9, RPL23A, RPS8, RPL18A, RPL13A, RPL7L1, RPS13, MRPL43	107	128	12782	24.2649	5.57449e-26	6.19388e-27	6.28957e-25
Biological Procoess	GO:0034660~ncRNA metabolic process	26	19.697	1.53518e-22	RPP38, RPL14, GAR1, MKI67IP, LIN28B, RPP14, RRP1B, RPL7, NPM3, RPL5, FTSJ3, RPS24, NSA2, RPP25, MPHOSPH10, RRP8, RPF1, DDX56, NOP2, POP1, POP4, POP5, PES1, RPP40, POP7, DDX51	102	230	13528	14.9927	5.94115e-20	9.90192e-21	2.13098e-19
Biological Procoess	GO:0034470~ncRNA processing	25	18.9394	2.11953e-23	RPP38, RPL14, GAR1, LIN28B, RPP14, RPL7, RRP1B, NPM3, RPL5, FTSJ3, RPS24, NSA2, RPP25, MPHOSPH10, RRP8, RPF1, DDX56, NOP2, POP1, POP4, POP5, PES1, RPP40, POP7, DDX51	102	187	13528	17.7309	8.20257e-21	1.64051e-21	2.94211e-20
Molecular Function	GO:0000166~nucleotide binding	25	18.9394	0.0656702	RBM34, MYEF2, MKI67IP, DDX27, HNRNPM, DDX18, HNRNPCL1, DDX24, DHX33, DDX21, DDX10, GNL2, RBM28, GNL3, RPS24, GTPBP4, MKI67, RPL23A, NCL, NVL, DDX56, DDX31, DDX54, NMNAT1, DDX51	103	2245	12983	1.40366	0.999503	0.292349	53.6984
Cellular Component	GO:0022626~cytosolic ribosome	21	15.9091	1.10028e-24	RPL19, RPL14, RPL13, RPL35, RPLP2, RPS9, RPL23A, RPS8, RPS26, RPL7, RPL18A, RPS3A, RPL6, RPLP0, RPL8, RPL3, RPS13, RPL5, RPL4, RPL7A, RPS24	107	81	12782	30.9706	1.07828e-22	9.80253e-24	1.2166e-21
Cellular Component	GO:0015934~large ribosomal subunit	20	15.1515	9.03652e-25	RPL17, RPL19, RPL14, RPL35, RPLP2, RPL23A, RPL7, RPL18A, RPL13A, RPL6, RPLP0, RPL7L1, NPM1, RPL8, RPL26L1, RPL3, RPL5, RPL4, RPL7A, MRPL43	107	67	12782	35.6591	8.85579e-23	8.85579e-24	9.99178e-22
Cellular Component	GO:0044445~cytosolic part	20	15.1515	1.51004e-17	RPL19, RPL14, RPL35, RPLP2, RPS9, RPL23A, RPS8, RPS26, RPL7, RPL18A, RPS3A, RPL6, RPLP0, RPL8, RPL3, RPS13, RPL5, RPL4, RPL7A, RPS24	107	152	12782	15.7182	1.47984e-15	1.13834e-16	1.66967e-14
Biological Procoess	GO:0016072~rRNA metabolic process	18	13.6364	3.20929e-19	RPL14, GAR1, MPHOSPH10, RRP8, MKI67IP, RPF1, DDX56, NOP2, RRP1B, RPL7, NPM3, RPL5, POP4, PES1, FTSJ3, DDX51, NSA2, RPS24	102	96	13528	24.8676	1.24199e-16	1.55249e-17	4.4548e-16
Biological Procoess	GO:0006364~rRNA processing	17	12.8788	5.22983e-18	RPL14, GAR1, MPHOSPH10, RRP8, RPF1, DDX56, NOP2, RRP1B, RPL7, NPM3, RPL5, POP4, PES1, FTSJ3, DDX51, NSA2, RPS24	102	92	13528	24.5072	2.02394e-15	2.24883e-16	7.25951e-15
Cellular Component	GO:0022625~cytosolic large ribosomal subunit	14	10.6061	1.84954e-18	RPL19, RPL14, RPL35, RPLP2, RPL23A, RPL7, RPL18A, RPL6, RPLP0, RPL8, RPL3, RPL5, RPL7A, RPL4	107	38	12782	44.0108	1.81254e-16	1.51045e-17	2.04505e-15
Molecular Function	GO:0008026~ATP-dependent helicase activity	10	7.57576	7.03442e-08	DDX27, DDX56, DDX18, DDX24, DDX31, DHX33, DDX21, DDX10, DDX54, DDX51	103	98	12983	12.8621	7.87852e-06	7.87854e-07	7.97406e-05
Molecular Function	GO:0070035~purine NTP-dependent helicase activity	10	7.57576	7.03442e-08	DDX27, DDX56, DDX18, DDX24, DDX31, DHX33, DDX21, DDX10, DDX54, DDX51	103	98	12983	12.8621	7.87852e-06	7.87854e-07	7.97406e-05
Molecular Function	GO:0004386~helicase activity	10	7.57576	1.49157e-06	DDX27, DDX56, DDX18, DDX24, DDX31, DHX33, DDX21, DDX10, DDX54, DDX51	103	140	12983	9.00347	0.000167042	1.39212e-05	0.0016908
Molecular Function	GO:0004518~nuclease activity	10	7.57576	4.0649e-06	RPP38, RPP25, REXO4, POP1, POP4, POP5, XRN2, RPP40, POP7, RPP14	103	158	12983	7.97776	0.000455166	3.25187e-05	0.00460778
Molecular Function	GO:0042623~ATPase activity, coupled	10	7.57576	0.000284985	DDX27, DDX56, DDX18, DDX24, DDX31, DHX33, DDX21, DDX10, DDX54, DDX51	103	272	12983	4.63414	0.0314187	0.00177192	0.322578
Molecular Function	GO:0016887~ATPase activity	10	7.57576	0.00124305	DDX27, DDX56, DDX18, DDX24, DDX31, DHX33, DDX21, DDX10, DDX54, DDX51	103	334	12983	3.77391	0.13004	0.00730517	1.40007
Cellular Component	GO:0005694~chromosome	10	7.57576	0.0141216	MKI67, HIST1H2AG, HJURP, HP1BP3, CENPC1, CENPV, RRS1, MKI67IP, H2AFX, PES1	107	460	12782	2.59691	0.751865	0.064216	14.5516
Cellular Component	GO:0044452~nucleolar part	9	6.81818	3.33423e-11	RPP38, SURF6, NPM1, POP1, POP4, PES1, POP5, RPP40, POP7	107	27	12782	39.8193	3.26755e-09	2.33396e-10	3.6867e-08
Molecular Function	GO:0004540~ribonuclease activity	9	6.81818	4.33507e-08	RPP38, RPP25, POP1, POP4, POP5, XRN2, RPP40, POP7, RPP14	103	66	12983	17.1884	4.85527e-06	5.39475e-07	4.91414e-05
Molecular Function	GO:0004526~ribonuclease P activity	8	6.06061	1.76443e-13	RPP38, RPP25, POP1, POP4, POP5, RPP40, POP7, RPP14	103	10	12983	100.839	1.97584e-11	4.9396e-12	1.99984e-10
Molecular Function	GO:0004549~tRNA-specific ribonuclease activity	8	6.06061	1.14997e-12	RPP38, RPP25, POP1, POP4, POP5, RPP40, POP7, RPP14	103	12	12983	84.0324	1.28797e-10	2.57593e-11	1.30358e-09
Molecular Function	GO:0016891~endoribonuclease activity, producing 5'-phosphomonoesters	8	6.06061	1.17092e-09	RPP38, RPP25, POP1, POP4, POP5, RPP40, POP7, RPP14	103	27	12983	37.3477	1.31143e-07	2.18572e-08	1.32733e-06
Molecular Function	GO:0019843~rRNA binding	8	6.06061	2.03172e-09	GAR1, RPL8, NPM1, RPS9, RPL5, RPL23A, RPF1, NOL12	103	29	12983	34.772	2.27553e-07	3.25075e-08	2.30311e-06
Molecular Function	GO:0016893~endonuclease activity, active with either ribo- or deoxyribonucleic acids and producing 5'-phosphomonoesters	8	6.06061	6.78157e-09	RPP38, RPP25, POP1, POP4, POP5, RPP40, POP7, RPP14	103	34	12983	29.6585	7.59535e-07	9.49419e-08	7.68744e-06
Molecular Function	GO:0004521~endoribonuclease activity	8	6.06061	7.2934e-08	RPP38, RPP25, POP1, POP4, POP5, RPP40, POP7, RPP14	103	47	12983	21.4551	8.16858e-06	7.42601e-07	8.26764e-05
Biological Procoess	GO:0008033~tRNA processing	8	6.06061	1.5033e-06	RPP38, RPP25, POP1, POP4, POP5, RPP40, POP7, RPP14	102	76	13528	13.9608	0.000581607	5.28874e-05	0.0020867
Molecular Function	GO:0004519~endonuclease activity	8	6.06061	1.32166e-05	RPP38, RPP25, POP1, POP4, POP5, RPP40, POP7, RPP14	103	100	12983	10.0839	0.00147917	9.86794e-05	0.014981
Biological Procoess	GO:0006399~tRNA metabolic process	8	6.06061	2.8082e-05	RPP38, RPP25, POP1, POP4, POP5, RPP40, POP7, RPP14	102	118	13528	8.99169	0.0108091	0.000905248	0.0389736
Biological Procoess	GO:0034621~cellular macromolecular complex subunit organization	8	6.06061	0.017414	HIST1H2AG, HJURP, HP1BP3, NIP7, NPM1, CENPV, H2AFX, XRN2	102	357	13528	2.97204	0.998885	0.276563	21.6397
Biological Procoess	GO:0051276~chromosome organization	8	6.06061	0.0706399	HIST1H2AG, HJURP, HP1BP3, NPM1, CENPV, RRS1, H2AFX, WHSC1	102	485	13528	2.18767	1	0.636706	63.8288
Cellular Component	GO:0015935~small ribosomal subunit	7	5.30303	1.30642e-05	RPS26, RPS3A, NPM1, RPS13, RPS9, RPS8, RPS24	107	63	12782	13.2731	0.00127948	7.53089e-05	0.0144443
Cellular Component	GO:0000793~condensed chromosome	7	5.30303	0.000703688	MKI67, HJURP, CENPC1, CENPV, RRS1, MKI67IP, PES1	107	129	12782	6.48221	0.06666	0.00344334	0.775328
Biological Procoess	GO:0034622~cellular macromolecular complex assembly	7	5.30303	0.0317653	HIST1H2AG, HJURP, HP1BP3, NIP7, NPM1, CENPV, H2AFX	102	318	13528	2.91947	0.999996	0.41909	36.1152
Biological Procoess	GO:0000279~M phase	7	5.30303	0.0365818	MKI67, CENPV, RRS1, H2AFX, PAPD5, ILF3, PES1	102	329	13528	2.82186	0.999999	0.451705	40.388
Biological Procoess	GO:0006325~chromatin organization	7	5.30303	0.0636007	HIST1H2AG, HJURP, HP1BP3, NPM1, CENPV, H2AFX, WHSC1	102	378	13528	2.45606	1	0.61011	59.8347
Biological Procoess	GO:0022403~cell cycle phase	7	5.30303	0.0894085	MKI67, CENPV, RRS1, H2AFX, PAPD5, ILF3, PES1	102	414	13528	2.24249	1	0.677842	72.7497
Cellular Component	GO:0005655~nucleolar ribonuclease P complex	6	4.54545	7.39249e-10	RPP38, POP1, POP4, POP5, RPP40, POP7	107	7	12782	102.393	7.24464e-08	4.82976e-09	8.17395e-07
Cellular Component	GO:0030677~ribonuclease P complex	6	4.54545	7.39249e-10	RPP38, POP1, POP4, POP5, RPP40, POP7	107	7	12782	102.393	7.24464e-08	4.82976e-09	8.17395e-07
Cellular Component	GO:0030681~multimeric ribonuclease P complex	6	4.54545	7.39249e-10	RPP38, POP1, POP4, POP5, RPP40, POP7	107	7	12782	102.393	7.24464e-08	4.82976e-09	8.17395e-07
Molecular Function	GO:0003724~RNA helicase activity	6	4.54545	2.77241e-06	DDX56, DDX18, DDX24, DDX21, DDX10, DDX54	103	29	12983	26.079	0.000310462	2.38851e-05	0.0031427
Cellular Component	GO:0022627~cytosolic small ribosomal subunit	6	4.54545	1.86336e-05	RPS26, RPS3A, RPS13, RPS9, RPS8, RPS24	107	40	12782	17.9187	0.00182445	0.000101446	0.0206015
Biological Procoess	GO:0031497~chromatin assembly	6	4.54545	0.000477962	HIST1H2AG, HJURP, HP1BP3, NPM1, CENPV, H2AFX	102	87	13528	9.14672	0.168909	0.0141312	0.66142
Biological Procoess	GO:0065004~protein-DNA complex assembly	6	4.54545	0.000587583	HIST1H2AG, HJURP, HP1BP3, NPM1, CENPV, H2AFX	102	91	13528	8.74467	0.203447	0.0150497	0.812543
Biological Procoess	GO:0006323~DNA packaging	6	4.54545	0.00181766	HIST1H2AG, HJURP, HP1BP3, NPM1, CENPV, H2AFX	102	117	13528	6.80141	0.505433	0.0430504	2.49376
Biological Procoess	GO:0006333~chromatin assembly or disassembly	6	4.54545	0.00260134	HIST1H2AG, HJURP, HP1BP3, NPM1, CENPV, H2AFX	102	127	13528	6.26586	0.635062	0.057572	3.55103
Biological Procoess	GO:0042273~ribosomal large subunit biogenesis	5	3.78788	5.93844e-07	RPL14, RPL7, NPM1, RPL5, PES1	102	10	13528	66.3137	0.000229791	2.29815e-05	0.00082431
Molecular Function	GO:0004004~ATP-dependent RNA helicase activity	5	3.78788	1.93936e-05	DDX56, DDX18, DDX24, DDX21, DDX54	103	21	12983	30.0116	0.00216974	0.000135747	0.0219819
Molecular Function	GO:0008186~RNA-dependent ATPase activity	5	3.78788	2.35605e-05	DDX56, DDX18, DDX24, DDX21, DDX54	103	22	12983	28.6474	0.00263533	0.000155212	0.0267045
Molecular Function	GO:0003729~mRNA binding	5	3.78788	0.00178183	RPS26, RPL7, FMR1, RPL35, RPS13	103	66	12983	9.54913	0.181059	0.00993745	2.00135
Biological Procoess	GO:0006334~nucleosome assembly	5	3.78788	0.00357642	HIST1H2AG, HJURP, HP1BP3, NPM1, H2AFX	102	84	13528	7.89449	0.750066	0.0741388	4.85168
Biological Procoess	GO:0034728~nucleosome organization	5	3.78788	0.00514309	HIST1H2AG, HJURP, HP1BP3, NPM1, H2AFX	102	93	13528	7.13051	0.864056	0.0996996	6.90738
Cellular Component	GO:0005732~small nucleolar ribonucleoprotein complex	4	3.0303	0.000570292	GAR1, MPHOSPH10, POP1, POP4	107	20	12782	23.8916	0.0543706	0.00293802	0.628772
Cellular Component	GO:0000775~chromosome, centromeric region	4	3.0303	0.0839126	MKI67, HJURP, CENPC1, CENPV	107	124	12782	3.85348	0.999814	0.281327	62.057
Biological Procoess	GO:0033119~negative regulation of RNA splicing	3	2.27273	0.000543897	RPS26, NPM1, RPS13	102	5	13528	79.5765	0.189858	0.0149264	0.752344
Biological Procoess	GO:0043484~regulation of RNA splicing	3	2.27273	0.00960694	RPS26, NPM1, RPS13	102	20	13528	19.8941	0.976147	0.170385	12.5409
Molecular Function	GO:0042393~histone binding	3	2.27273	0.0467017	HJURP, NPM1, H2AFX	103	44	12983	8.59422	0.995283	0.225145	41.851
Cellular Component	GO:0000777~condensed chromosome kinetochore	3	2.27273	0.0834904	HJURP, CENPC1, CENPV	107	58	12782	6.17886	0.999805	0.289479	61.8631
Biological Procoess	GO:0006401~RNA catabolic process	3	2.27273	0.0848201	POP1, LIN28B, XRN2	102	65	13528	6.12127	1	0.669287	70.7805
Cellular Component	GO:0000786~nucleosome	3	2.27273	0.0960946	HIST1H2AG, HP1BP3, H2AFX	107	63	12782	5.68847	0.99995	0.306985	67.2774
Cellular Component	GO:0000172~ribonuclease MRP complex	2	1.51515	0.0165177	POP1, POP4	107	2	12782	119.458	0.804511	0.0715078	16.82
Biological Procoess	GO:0031055~chromatin remodeling at centromere	2	1.51515	0.0222328	HJURP, CENPV	102	3	13528	88.4183	0.999834	0.326662	26.8088
Cellular Component	GO:0042788~polysomal ribosome	2	1.51515	0.0327651	FMR1, RPL7A	107	4	12782	59.729	0.961794	0.132332	30.8129
Cellular Component	GO:0001652~granular component	2	1.51515	0.0407888	SURF6, NPM1	107	5	12782	47.7832	0.983111	0.156374	36.9008
Biological Procoess	GO:0034508~centromere complex assembly	2	1.51515	0.0439761	HJURP, CENPV	102	6	13528	44.2092	1	0.50151	46.4343
Biological Procoess	GO:0034661~ncRNA catabolic process	2	1.51515	0.051117	POP1, LIN28B	102	7	13528	37.8936	1	0.542048	51.7286
Biological Procoess	GO:0042255~ribosome assembly	2	1.51515	0.0722241	NIP7, NPM1	102	10	13528	26.5255	1	0.632266	64.6753
Biological Procoess	GO:0042274~ribosomal small subunit biogenesis	2	1.51515	0.079156	NPM1, RPS24	102	11	13528	24.1141	1	0.654856	68.1678

## Sheet: Funtional_annotation_table
ID	Gene Name	Biological Process	Cellular Component	Molecular Function
XRN2	5'-3' exoribonuclease 2	DNA catabolic process, exonucleolytic, DNA metabolic proc ess, DNA catabolic process, transcription, transcription- DNA-dependent, transcription termination, RNA processing, mRNA processing, RNA catabolic process, gamete generation, spermatogenesis, regulation of cell size, macromolecule catabolic process, cell growth, mRNA metabolic process, sexual reproduction, cellular component disassembly, m…	nucleolus, membrane-enclosed lumen, nuclear lumen, non-membrane-bounded organelle, intracellular non-membrane-bounded organelle, organelle lumen, intracellular organelle lumen,	nuclease activity, exonuclease activity, exoribonuclease activity, 5'-3' exoribonuclease activity, ribonuclease activity, zinc ion binding, 5'-3' exonuclease activity, exonuclease activity, active with either ribo- or deoxyribonucleic acids and producing 5'-phosphomonoesters, exoribonuclease activity, producing 5'-phosphomonoesters, ion binding, cation binding, metal ion binding, transition metal…
DDX21	DEAD (Asp-Glu-Ala-Asp) box polypeptide 21		nucleolus, membrane-enclosed lumen, nuclear lumen, non-membrane-bounded organelle, intracellular non-membrane-bounded organelle, organelle lumen, intracellular organelle lumen,	nucleotide binding, nucleoside binding, purine nucleoside binding, RNA binding, RNA helicase activity, ATP-dependent RNA helicase activity, helicase activity, ATP binding, ATP-dependent helicase activity, RNA-dependent ATPase activity, ATPase activity, purine nucleotide binding, adenyl nucleotide binding, ribonucleotide binding, purine ribonucleotide binding, adenyl ribonucleotide binding, ATPase…
DDX24	DEAD (Asp-Glu-Ala-Asp) box polypeptide 24		nucleolus, membrane-enclosed lumen, nuclear lumen, non-membrane-bounded organelle, intracellular non-membrane-bounded organelle, organelle lumen, intracellular organelle lumen,	nucleotide binding, nucleoside binding, purine nucleoside binding, RNA binding, RNA helicase activity,ATP-dependent RNA helicase activity, helicase activity, ATP binding, ATP-dependent helicase activity, RNA-dependent ATPase activity, ATPase activity, purine nucleotide binding, adenyl nucleotide binding, ribonucleotide binding, purine ribonucleotide binding, adenyl ribonucleotide binding, ATPase …
DDX31	DEAD (Asp-Glu-Ala-Asp) box polypeptide 31		nucleolus, membrane-enclosed lumen, nuclear lumen, non-membrane-bounded organelle, intracellular non-membrane-bounded organelle, organelle lumen, intracellular organelle lumen,	nucleotide binding, nucleoside binding, purine nucleoside binding, RNA binding, helicase activity, ATP binding, ATP-dependent helicase activity, ATPase activity, purine nucleotide binding, adenyl nucleotide binding, ribonucleotide binding, purine ribonucleotide binding, adenyl ribonucleotide binding, ATPase activity, coupled, purine NTP-dependent helicase activity,
DDX51	DEAD (Asp-Glu-Ala-Asp) box polypeptide 51	rRNA processing,RNA processing,rRNA metabolic process,ribonucleoprotein complex biogenesis,ncRNA processing,ncRNA metabolic process,ribosome biogenesis,	nucleolus, membrane-enclosed lumen, nuclear lumen, non-membrane-bounded organelle, intracellular non-membrane-bounded organelle, organelle lumen, intracellular organelle lumen,	nucleotide binding, nucleoside binding, purine nucleoside binding, RNA binding, helicase activity, ATP binding, ATP-dependent helicase activity, ATPase activity, purine nucleotide binding, adenyl nucleotide binding, ribonucleotide binding, purine ribonucleotide binding, adenyl ribonucleotide binding, ATPase activity, coupled, purine NTP-dependent helicase activity,
DDX54	DEAD (Asp-Glu-Ala-Asp) box polypeptide 54	transcription,RNA processing,intracellular signaling cascade,steroid hormone receptor signaling pathway,estrogen receptor signaling pathway,intracellular receptor-mediated signaling pathway,regulation of transcription,	nucleolus, membrane-enclosed lumen, nuclear lumen, non-membrane-bounded organelle, intracellular non-membrane-bounded organelle, organelle lumen, intracellular organelle lumen,	nucleotide binding, nucleoside binding, purine nucleoside binding, transcription cofactor activity, transcription corepressor activity, RNA binding, RNA helicase activity, ATP-dependent RNA helicase activity, helicase activity, ATP binding, ATP-dependent helicase activity, transcription factor binding, RNA-dependent ATPase activity, transcription repressor activity, ATPase activity, purine nucleo…
DDX56	DEAD (Asp-Glu-Ala-Asp) box polypeptide 56	rRNA processing,RNA processing,rRNA metabolic process,ribonucleoprotein complex biogenesis,ncRNA processing,ncRNA metabolic process,ribosome biogenesis,	nucleolus, membrane-enclosed lumen, nuclear lumen, non-membrane-bounded organelle, intracellular non-membrane-bounded organelle, organelle lumen, intracellular organelle lumen,	nucleotide binding, nucleoside binding, purine nucleoside binding, RNA binding, RNA helicase activity, ATP-dependent RNA helicase activity, helicase activity, ATP binding, ATP-dependent helicase activity, RNA-dependent ATPase activity, ATPase activity, purine nucleotide binding, adenyl nucleotide binding, ribonucleotide binding, purine ribonucleotide binding, adenyl ribonucleotide binding, ATPase…
DHX33	DEAH (Asp-Glu-Ala-His) box polypeptide 33		nucleolus, membrane-enclosed lumen, nuclear lumen, non-membrane-bounded organelle, intracellular non-membrane-bounded organelle, organelle lumen, intracellular organelle lumen,	nucleotide binding, nucleoside binding, purine nucleoside binding, helicase activity, ATP binding, ATP-dependent helicase activity, ATPase activity, purine nucleotide binding, adenyl nucleotide binding, ribonucleotide binding, purine ribonucleotide binding, adenyl ribonucleotide binding, ATPase activity, coupled, purine NTP-dependent helicase activity,
FTSJ3	FtsJ homolog 3 (E. coli)	rRNA modification,RNA methylation, rRNA processing, RNA processing, one-carbon metabolic process, RNA modification, rRNA metabolic process, ribonucleoprotein complex biogenesis, rRNA methylation, methylation, ncRNA processing, ncRNA metabolic process, ribosome biogenesis, biopolymer methylation,	nucleolus, membrane-enclosed lumen, nuclear lumen, non-membrane-bounded organelle, intracellular non-membrane-bounded organelle, organelle lumen, intracellular organelle lumen,
GAR1	GAR1 ribonucleoprotein homolog (yeast)	rRNA processing, RNA processing, rRNA metabolic process, ribonucleoprotein complex biogenesis, ncRNA processing, ncRNA metabolic process, ribosome biogenesis,	nucleoplasm, nucleolus, small nucleolar ribonucleoprotein complex, Cajal body, nuclear body, ribonucleoprotein complex, membrane-enclosed lumen, nuclear lumen, non-membrane-bounded organelle, intracellular non-membrane-bounded organelle, organelle lumen, nucleoplasm part, intracellular organelle lumen,	RNA binding, ion channel activity, cation channel activity, channel activity, rRNA binding, passive transmembrane transporter activity, substrate specific channel activity, metal ion transmembrane transporter activity,
GTPBP4	GTP binding protein 4	regulation of cyclin-dependent protein kinase activity, regulation of DNA replication, negative regulation of cell adhesion, negative regulation of DNA replication, negative regulation of cell proliferation, negative regulation of biosynthetic process, negative regulation of macromolecule biosynthetic process, negative regulation of macromolecule metabolic process, posttranscriptional regulation …	nucleolus, membrane-enclosed lumen, nuclear lumen, non-membrane-bounded organelle, intracellular non-membrane-bounded organelle, organelle lumen, perinuclear region of cytoplasm, intracellular organelle lumen,	nucleotide binding, GTPase activity, GTP binding, purine nucleotide binding, guanyl nucleotide binding, ribonucleotide binding, purine ribonucleotide binding, guanyl ribonucleotide binding,
HJURP	Holliday junction recognition protein	DNA packaging, chromatin organization, chromatin assembly or disassembly, nucleosome assembly,DNA replication-independent nucleosome assembly, chromatin remodeling, cell cycle, chromosome segregation, chromatin modification, chromatin remodeling at centromere, chromatin assembly, CenH3-containing nucleosome assembly at centromere, centromere complex assembly, centromeric core chromatin formation,…	chromosome: centromeric region, kinetochore, condensed chromosome kinetochore, condensed chromosome, centromeric region, condensed chromosome,chromosome, nucleolus, membrane-enclosed lumen, nuclear lumen, non-membrane-bounded organelle, intracellular non-membrane-bounded organelle, organelle lumen, chromosomal part, intracellular organelle lumen,	DNA binding, histone binding,
KIAA0020	KIAA0020		nucleolus, endoplasmic reticulum, membrane-enclosed lumen, nuclear lumen,non-membrane-bounded organelle, intracellular non-membrane-bounded organelle, organelle lumen, intracellular organelle lumen,	RNA binding,
LYAR	Ly1 antibody reactive homolog (mouse)		nucleolus, membrane-enclosed lumen, nuclear lumen, non-membrane-bounded organelle, intracellular non-membrane-bounded organelle, organelle lumen, intracellular organelle lumen,	GO:0008270~zinc ion binding,GO:0043167~ion binding,GO:0043169~cation binding,GO:0046872~metal ion binding,GO:0046914~transition metal ion binding,
MPHOSPH10	M-phase phosphoprotein 10 (U3 small nucleolar ribonucleoprotein)	rRNA processing,RNA processing, RNA splicing, rRNA metabolic process, ribonucleoprotein complex biogenesis, ncRNA processing, ncRNA metabolic process, ribosome biogenesis,	nucleolus, small nucleolar ribonucleoprotein complex, ribonucleoprotein complex, membrane-enclosed lumen, nuclear lumen, non-membrane-bounded organelle, intracellular non-membrane-bounded organelle, organelle lumen, intracellular organelle lumen,	RNA splicing factor activity, transesterification mechanism,
MAK16	MAK16 homolog (S. cerevisiae)		nucleolus, membrane-enclosed lumen, nuclear lumen, non-membrane-bounded organelle, intracellular non-membrane-bounded organelle, organelle lumen, intracellular organelle lumen,
MKI67IP	MKI67 (FHA domain) interacting nucleolar phosphoprotein	transcription, transcription, DNA-dependent, protein complex assembly, rRNA transcription, rRNA metabolic process, RNA biosynthetic process, ncRNA metabolic process, macromolecular complex subunit organization, macromolecular complex assembly,protein complex biogenesis,	nuclear chromosome, condensed chromosome, condensed nuclear chromosome, nucleoplasm, chromosome, nucleolus, membrane-enclosed lumen, nuclear lumen, non-membrane-bounded organelle, intracellular non-membrane-bounded organelle, organelle lumen, intracellular organelle lumen,	nucleotide binding, RNA binding,
MYBBP1A	MYB binding protein (P160) 1a	transcription,regulation of transcription, DNA-dependent, nucleocytoplasmic transport, regulation of transcription, intracellular transport, nuclear transport, regulation of RNA metabolic process,	nucleolus, nucleocytoplasmic shuttling complex, membrane-enclosed lumen, nuclear lumen, NLS-dependent protein nuclear import complex, non-membrane-bounded organelle, intracellular non-membrane-bounded organelle, organelle lumen, intracellular organelle lumen,	DNA binding, DNA-directed DNA polymerase activity, transcription factor binding, nucleotidyltransferase activity, DNA polymerase activity,
MINA	MYC induced nuclear antigen	ribonucleoprotein complex biogenesis,ribosome biogenesis,	nucleolus, membrane-enclosed lumen, nuclear lumen, non-membrane-bounded organelle, intracellular non-membrane-bounded organelle, organelle lumen, intracellular organelle lumen,
NOP16	NOP16 nucleolar protein homolog (yeast)		nucleolus, membrane-enclosed lumen, nuclear lumen, non-membrane-bounded organelle, intracellular non-membrane-bounded organelle, organelle lumen, intracellular organelle lumen,
NOP2	NOP2 nucleolar protein homolog (yeast)	rRNA processing,RNA processing, positive regulation of cell proliferation, rRNA metabolic process, ribonucleoprotein complex biogenesis,ncRNA processing, ncRNA metabolic process, regulation of cell proliferation, ribosome biogenesis,	nucleolus, membrane-enclosed lumen, nuclear lumen, non-membrane-bounded organelle, intracellular non-membrane-bounded organelle, organelle lumen, intracellular organelle lumen,	RNA binding,
PPAN-P2RY11	PPAN-P2RY11 readthrough transcript	RNA processing, RNA splicing,	nucleolus, membrane-enclosed lumen, nuclear lumen, non-membrane-bounded organelle, intracellular non-membrane-bounded organelle, organelle lumen, intracellular organelle lumen,
REXO4	REX4, RNA exonuclease 4 homolog (S. cerevisiae)	regulation of transcription: DNA-dependent, regulation of transcription, regulation of RNA metabolic process,	nucleolus, membrane-enclosed lumen, nuclear lumen, non-membrane-bounded organelle, intracellular non-membrane-bounded organelle, organelle lumen, intracellular organelle lumen,	DNA binding, transcription factor activity, nuclease activity, exonuclease activity, transcription regulator activity,
RBM28	RNA binding motif protein 28	RNA processing, mRNA processing, RNA splicing, mRNA metabolic process,	spliceosome, nucleolus, ribonucleoprotein complex, membrane-enclosed lumen, nuclear lumen, non-membrane-bounded organelle, intracellular non-membrane-bounded organelle, organelle lumen, intracellular organelle lumen,	nucleotide binding, RNA binding,
RBM34	RNA binding motif protein 34		nucleolus, membrane-enclosed lumen, nuclear lumen, non-membrane-bounded organelle, intracellular non-membrane-bounded organelle, organelle lumen, intracellular organelle lumen,	nucleotide binding, RNA binding,
RRS1	RRS1 ribosome biogenesis regulator homolog (S. cerevisiae)	mitotic sister chromatid segregation, M phase of mitotic cell cycle, mitotic cell cycle, M phase, nuclear division, sister chromatid segregation, cell cycle, chromosome segregation, mitosis, mitotic metaphase plate congression, cell cycle process, cell cycle phase, ribonucleoprotein complex biogenesis, ribosome biogenesis, organelle fission, chromosome localization, chromosome organization, estab…	nuclear chromosome, condensed chromosome, condensed nuclear chromosome, chromosome, nucleolus, membrane-enclosed lumen, nuclear lumen, non-membrane-bounded organelle, intracellular non-membrane-bounded organelle, organelle lumen, intracellular organelle lumen,
SDAD1	SDA1 domain containing 1	protein localization, protein transport, ribonucleoprotein complex biogenesis, ribosome biogenesis, establishment of protein localization,	nucleolus, membrane-enclosed lumen, nuclear lumen, non-membrane-bounded organelle, intracellular non-membrane-bounded organelle, organelle lumen, intracellular organelle lumen,
SENP5	SUMO1/sentrin specific peptidase 5	proteolysis, cell cycle, macromolecule catabolic process, modification-dependent protein catabolic process, protein catabolic process, modification-dependent macromolecule catabolic process, cellular protein catabolic process, cellular macromolecule catabolic process, cell division, proteolysis involved in cellular protein catabolic process,	nucleolus, membrane-enclosed lumen, nuclear lumen, non-membrane-bounded organelle, intracellular non-membrane-bounded organelle, organelle lumen, intracellular organelle lumen,	peptidase activity, cysteine-type peptidase activity, peptidase activity, acting on L-amino acid peptides,
URB1	URB1 ribosome biogenesis 1 homolog (S. cerevisiae)		nucleolus, membrane-enclosed lumen, nuclear lumen, non-membrane-bounded organelle, intracellular non-membrane-bounded organelle, organelle lumen, intracellular organelle lumen,
MKI67	antigen identified by monoclonal antibody Ki-67	M phase,cell cycle,meiosis, cell proliferation, cell cycle process, cell cycle phase, meiotic cell cycle, M phase of meiotic cell cycle,	chromosome, centromeric region, condensed chromosome, chromosome, nucleolus, membrane-enclosed lumen, nuclear lumen, non-membrane-bounded organelle, intracellular non-membrane-bounded organelle, organelle lumen, chromosomal part, intracellular organelle lumen,	nucleotide binding, nucleoside binding, purine nucleoside binding, ATP binding, protein C-terminus binding, purine nucleotide binding, adenyl nucleotide binding, ribonucleotide binding, purine ribonucleotide binding, adenyl ribonucleotide binding,
RPF2	brix domain containing 1 pseudogene; brix domain containing 1		nucleolus, membrane-enclosed lumen, nuclear lumen, non-membrane-bounded organelle, intracellular non-membrane-bounded organelle, organelle lumen, intracellular organelle lumen,
BRIX1	brix domain containing 2	ribonucleoprotein complex biogenesis, ribosome biogenesis,	nucleolus, membrane-enclosed lumen, nuclear lumen, non-membrane-bounded organelle, intracellular non-membrane-bounded organelle, organelle lumen, intracellular organelle lumen,
RPF1	brix domain containing 5	rRNA processing, RNA processing, rRNA metabolic process, ribonucleoprotein complex biogenesis, ncRNA processing, ncRNA metabolic process, ribosome biogenesis,	nucleolus, membrane-enclosed lumen, nuclear lumen, non-membrane-bounded organelle, intracellular non-membrane-bounded organelle, organelle lumen, intracellular organelle lumen,	RNA binding, rRNA binding,
FMR1	fragile X mental retardation 1	RNA localization, nucleobase, nucleoside, nucleotide and nucleic acid transport, nucleic acid transport, RNA transport, mRNA transport, establishment of RNA localization,	cell fraction, soluble fraction, nucleoplasm, nucleolus, ribosome, polysome, ribonucleoprotein complex, membrane-enclosed lumen, nuclear lumen, polysomal ribosome, non-membrane-bounded organelle, intracellular non-membrane-bounded organelle, organelle lumen, intracellular organelle lumen,	RNA binding,mRNA binding,
GLTSCR2	glioma tumor suppressor candidate region gene 2; glioma tumor suppressor candidate region gene 2 pseudogene		nucleolus, membrane-enclosed lumen, nuclear lumen, non-membrane-bounded organelle, intracellular non-membrane-bounded organelle, organelle lumen, intracellular organelle lumen,
GNL2	guanine nucleotide binding protein-like 2 (nucleolar)	ribonucleoprotein complex biogenesis, ribosome biogenesis,	nucleolus, membrane-enclosed lumen, nuclear lumen, non-membrane-bounded organelle, intracellular non-membrane-bounded organelle, organelle lumen, intracellular organelle lumen,	nucleotide binding, GTPase activity, GTP binding, purine nucleotide binding, guanyl nucleotide binding, ribonucleotide binding, purine ribonucleotide binding, guanyl ribonucleotide binding,
GNL3	guanine nucleotide binding protein-like 3 (nucleolar)	regulation of cell proliferation,	nucleoplasm, nucleolus, membrane-enclosed lumen, nuclear lumen, non-membrane-bounded organelle, intracellular non-membrane-bounded organelle, organelle lumen, intracellular organelle lumen,	nucleotide binding, GTP binding, purine nucleotide binding, guanyl nucleotide binding, ribonucleotide binding, purine ribonucleotide binding, guanyl ribonucleotide binding,
HNRNPM	heterogeneous nuclear ribonucleoprotein M	RNA splicing: via transesterification reactions, RNA splicing, via transesterification reactions with bulged adenosine as nucleophile, nuclear mRNA splicing: via spliceosome, RNA processing, mRNA processing, RNA splicing, mRNA metabolic process,	spliceosome, nucleolus, plasma membrane, integral to plasma membrane, integral to membrane, ribonucleoprotein complex, intrinsic to membrane, intrinsic to plasma membrane, membrane-enclosed lumen, nuclear lumen, non-membrane-bounded organelle, intracellular non-membrane-bounded organelle, organelle lumen, plasma membrane part, intracellular organelle lumen,	nucleotide binding, RNA binding, protein domain specific binding,
NSA2	hypothetical gene supported by NM_014886; TGF beta-inducible nuclear protein 1; similar to TGF beta-inducible nuclear protein 1	rRNA processing, RNA processing, rRNA metabolic process, ribonucleoprotein complex biogenesis, ncRNA processing, ncRNA metabolic process, ribosome biogenesis,	nucleolus, ribonucleoprotein complex, membrane-enclosed lumen, nuclear lumen, non-membrane-bounded organelle, intracellular non-membrane-bounded organelle, organelle lumen, intracellular organelle lumen,
ILF3	interleukin enhancer binding factor 3, 90kDa	M phase, transcription, regulation of transcription, DNA-dependent, cell cycle, negative regulation of biosynthetic process, positive regulation of biosynthetic process, positive regulation of macromolecule biosynthetic process, negative regulation of macromolecule biosynthetic process, positive regulation of macromolecule metabolic process, negative regulation of macromolecule metabolic process,…	nucleolus, mitochondrion, ribonucleoprotein complex, membrane-enclosed lumen, nuclear lumen, non-membrane-bounded organelle, intracellular non-membrane-bounded organelle, organelle lumen, intracellular organelle lumen,	DNA binding, RNA binding, double-stranded RNA binding, transcription activator activity, transcription repressor activity, transcription regulator activity,
MYEF2	myelin expression factor 2	cell fate determination, transcription, transcription, DNA-dependent, transcription from RNA polymerase II promoter, myoblast cell fate determination, RNA biosynthetic process, muscle cell differentiation, cell fate commitment, myoblast differentiation, myoblast cell fate commitment,	nucleolus, Golgi apparatus, membrane-enclosed lumen, nuclear lumen, non-membrane-bounded organelle, intracellular non-membrane-bounded organelle, organelle lumen, intracellular organelle lumen,	nucleotide binding, DNA binding, transcription factor activity, RNA polymerase II transcription factor activity, RNA polymerase II transcription factor activity, enhancer binding, transcription cofactor activity, transcription coactivator activity, RNA binding, transcription factor binding, transcription activator activity, transcription regulator activity, sequence-specific DNA binding,
NVL	nuclear VCP-like		nucleolus, membrane-enclosed lumen, nuclear lumen, non-membrane-bounded organelle, intracellular non-membrane-bounded organelle, organelle lumen, intracellular organelle lumen,	nucleotide binding, nucleoside binding, purine nucleoside binding, ATP binding, purine nucleotide binding, adenyl nucleotide binding, ribonucleotide binding, purine ribonucleotide binding, adenyl ribonucleotide binding,
NIP7	nuclear import 7 homolog (S. cerevisiae)	ribonucleoprotein complex biogenesis, ribonucleoprotein complex assembly, cellular macromolecular complex subunit organization, cellular macromolecular complex assembly, ribosome biogenesis, ribosome assembly, macromolecular complex subunit organization, macromolecular complex assembly,	nucleolus, membrane-enclosed lumen, nuclear lumen, non-membrane-bounded organelle, intracellular non-membrane-bounded organelle, organelle lumen, intracellular organelle lumen,	RNA binding,
NOC2L	nucleolar complex associated 2 homolog (S. cerevisiae)		nucleolus, membrane-enclosed lumen, nuclear lumen, non-membrane-bounded organelle, intracellular non-membrane-bounded organelle, organelle lumen, intracellular organelle lumen,
NOC3L	nucleolar complex associated 3 homolog (S. cerevisiae)	fat cell differentiation,	nucleoplasm, nucleolus, nuclear body, nuclear speck, membrane-enclosed lumen, nuclear lumen, non-membrane-bounded organelle, intracellular non-membrane-bounded organelle, organelle lumen, nucleoplasm part, intracellular organelle lumen,
NOL12	nucleolar protein 12		nucleolus, membrane-enclosed lumen, nuclear lumen, non-membrane-bounded organelle, intracellular non-membrane-bounded organelle, organelle lumen, intracellular organelle lumen,	RNA binding, rRNA binding,
NCL	nucleolin	angiogenesis, blood vessel development, vasculature development, blood vessel morphogenesis,	nucleoplasm, nucleolus, cell cortex, ribonucleoprotein complex, membrane-enclosed lumen, nuclear lumen, non-membrane-bounded organelle, intracellular non-membrane-bounded organelle, organelle lumen, intracellular organelle lumen,	nucleotide binding, DNA binding, RNA binding, protein C-terminus binding, telomeric DNA binding, sequence-specific DNA binding,
NPM1	nucleophosmin 1 (nucleolar phosphoprotein B23, numatrin) pseudogene 21; hypothetical LOC100131044; similar to nucleophosmin 1; nucleophosmin (nucleolar phosphoprotein B23, numatrin)	ribosome export from nucleus, ribosomal large subunit export from nucleus, ribosomal small subunit export from nucleus, microtubule cytoskeleton organization, DNA packaging, chromatin organization, chromatin assembly or disassembly, nucleosome assembly, RNA localization, RNA export from nucleus, rRNA export from nucleus, protein complex assembly, cell volume homeostasis, intracellular protein tra…	spindle pole, granular component, nucleoplasm, nucleolus, centrosome, microtubule organizing center, spindle, cytosol, ribosome, cytoskeleton, microtubule cytoskeleton, large ribosomal subunit, small ribosomal subunit, nuclear body, nuclear speck, ribonucleoprotein complex, spindle pole centrosome, membrane-enclosed lumen, nuclear lumen, ribosomal subunit, non-membrane-bounded organelle, intracel…	transcription cofactor activity, transcription coactivator activity, RNA binding, transcription factor binding, transcription activator activity, rRNA binding, transcription regulator activity, Tat protein binding, histone binding, identical protein binding, protein homodimerization activity, ribonucleoprotein binding, ribosomal large subunit binding, ribosomal small subunit binding, protein hete…
NPM3	nucleophosmin/nucleoplasmin, 3	transcription, transcription, DNA-dependent, rRNA processing, RNA processing, rRNA transcription, rRNA metabolic process, ribonucleoprotein complex biogenesis, RNA biosynthetic process, ncRNA processing, ncRNA metabolic process, ribosome biogenesis,	nucleolus, membrane-enclosed lumen, nuclear lumen, non-membrane-bounded organelle, intracellular non-membrane-bounded organelle, organelle lumen, intracellular organelle lumen,
PES1	pescadillo homolog 1, containing BRCT domain (zebrafish)	M phase of mitotic cell cycle, mitotic metaphase, mitotic cell cycle, M phase, nuclear division, maturation of 5.8S rRNA, maturation of LSU-rRNA from tricistronic rRNA transcript (SSU-rRNA, 5.8S rRNA, LSU-rRNA), maturation of 5.8S rRNA from tricistronic rRNA transcript (SSU-rRNA, 5.8S rRNA, LSU-rRNA), maturation of LSU-rRNA, rRNA processing, RNA processing, nucleus organization, nucleolus organiz…	condensed chromosome, nucleoplasm, chromosome, nucleolus, ribonucleoprotein complex, preribosome, 90S preribosome, preribosome, large subunit precursor, membrane-enclosed lumen, nuclear lumen, non-membrane-bounded organelle, intracellular non-membrane-bounded organelle, organelle lumen, nucleolar part, intracellular organelle lumen, PeBoW complex,
POP1	processing of precursor 1, ribonuclease P/MRP subunit (S. cerevisiae)	tRNA 5'-leader removal, RNA processing, tRNA metabolic process, RNA catabolic process, tRNA processing, macromolecule catabolic process, tRNA catabolic process, ncRNA processing, ncRNA metabolic process, ncRNA catabolic process, cellular macromolecule catabolic process,	ribonuclease MRP complex, nucleolar ribonuclease P complex, nucleolus, small nucleolar ribonucleoprotein complex, ribonucleoprotein complex, ribonuclease P complex, multimeric ribonuclease P complex, membrane-enclosed lumen, nuclear lumen, non-membrane-bounded organelle, intracellular non-membrane-bounded organelle, organelle lumen, nucleolar part, intracellular organelle lumen,	ribonuclease MRP activity, nuclease activity, endonuclease activity, endoribonuclease activity, ribonuclease P activity, ribonuclease activity, tRNA-specific ribonuclease activity, endoribonuclease activity, producing 5'-phosphomonoesters, endonuclease activity, active with either ribo- or deoxyribonucleic acids and producing 5'-phosphomonoesters, identical protein binding,
POP4	processing of precursor 4, ribonuclease P/MRP subunit (S. cerevisiae)	rRNA processing, mRNA cleavage, RNA processing, mRNA processing, tRNA metabolic process, tRNA processing, mRNA metabolic process, rRNA metabolic process, ribonucleoprotein complex biogenesis, ncRNA processing, ncRNA metabolic process, ribosome biogenesis,	ribonuclease MRP complex, nucleolar ribonuclease P complex, nucleolus, small nucleolar ribonucleoprotein complex, ribonucleoprotein complex, ribonuclease P complex, multimeric ribonuclease P complex, membrane-enclosed lumen, nuclear lumen, non-membrane-bounded organelle, intracellular non-membrane-bounded organelle, organelle lumen, nucleolar part, intracellular organelle lumen,	RNA binding, nuclease activity, endonuclease activity, endoribonuclease activity, ribonuclease P activity, ribonuclease activity, tRNA-specific ribonuclease activity, endoribonuclease activity, producing 5'-phosphomonoesters, endonuclease activity, active with either ribo- or deoxyribonucleic acids and producing 5'-phosphomonoesters, identical protein binding,
POP5	processing of precursor 5, ribonuclease P/MRP subunit (S. cerevisiae)	RNA processing, tRNA metabolic process, tRNA processing, ncRNA processing, ncRNA metabolic process,	nucleolar ribonuclease P complex, nucleolus, ribonucleoprotein complex, ribonuclease P complex, multimeric ribonuclease P complex, membrane-enclosed lumen, nuclear lumen, non-membrane-bounded organelle, intracellular non-membrane-bounded organelle, organelle lumen, nucleolar part, intracellular organelle lumen,	nuclease activity, endonuclease activity, endoribonuclease activity, ribonuclease P activity, ribonuclease activity, tRNA-specific ribonuclease activity, endoribonuclease activity, producing 5'-phosphomonoesters, endonuclease activity, active with either ribo- or deoxyribonucleic acids and producing 5'-phosphomonoesters,
POP7	processing of precursor 7, ribonuclease P/MRP subunit (S. cerevisiae)	RNA processing, tRNA metabolic process, tRNA processing, ncRNA processing, ncRNA metabolic process,	nucleolar ribonuclease P complex, nucleolus, ribonucleoprotein complex, ribonuclease P complex, multimeric ribonuclease P complex, membrane-enclosed lumen, nuclear lumen, non-membrane-bounded organelle, intracellular non-membrane-bounded organelle, organelle lumen, nucleolar part, intracellular organelle lumen,	nuclease activity, endonuclease activity, endoribonuclease activity, ribonuclease P activity, ribonuclease activity, tRNA-specific ribonuclease activity, endoribonuclease activity, producing 5'-phosphomonoesters,G endonuclease activity, active with either ribo- or deoxyribonucleic acids and producing 5'-phosphomonoesters,
RPP38	ribonuclease P/MRP 38kDa subunit	RNA processing, tRNA metabolic process, tRNA processing, ncRNA processing, ncRNA metabolic process,	nucleolar ribonuclease P complex, nucleolus, ribonucleoprotein complex, ribonuclease P complex, multimeric ribonuclease P complex, membrane-enclosed lumen, nuclear lumen, non-membrane-bounded organelle, intracellular non-membrane-bounded organelle, organelle lumen, nucleolar part, intracellular organelle lumen,	nuclease activity, endonuclease activity, endoribonuclease activity, ribonuclease P activity, ribonuclease activity, tRNA-specific ribonuclease activity, endoribonuclease activity, producing 5'-phosphomonoesters, endonuclease activity, active with either ribo- or deoxyribonucleic acids and producing 5'-phosphomonoesters,
RPP40	ribonuclease P/MRP 40kDa subunit	RNA processing, tRNA metabolic process, tRNA processing, ncRNA processing, ncRNA metabolic process,	nucleolar ribonuclease P complex, nucleolus, ribonucleoprotein complex, ribonuclease P complex, multimeric ribonuclease P complex, membrane-enclosed lumen, nuclear lumen, non-membrane-bounded organelle, intracellular non-membrane-bounded organelle, organelle lumen, nucleolar part, intracellular organelle lumen,	nuclease activity, endonuclease activity, endoribonuclease activity, ribonuclease P activity, ribonuclease activity, tRNA-specific ribonuclease activity, endoribonuclease activity, producing 5'-phosphomonoesters, endonuclease activity, active with either ribo- or deoxyribonucleic acids and producing 5'-phosphomonoesters,
RSL1D1	ribosomal L1 domain containing 1	RNA processing, translation, regulation of protein localization,	nucleolus, ribosome, ribonucleoprotein complex, membrane-enclosed lumen, nuclear lumen, non-membrane-bounded organelle, intracellular non-membrane-bounded organelle, organelle lumen, intracellular organelle lumen,	RNA binding, structural constituent of ribosome, structural molecule activity,
RSL24D1	ribosomal L24 domain containing 1; similar to ribosomal protein L24-like	translation, ribonucleoprotein complex biogenesis, ribosome biogenesis,	nucleolus, ribosome, ribonucleoprotein complex, membrane-enclosed lumen, nuclear lumen, non-membrane-bounded organelle, intracellular non-membrane-bounded organelle, organelle lumen, intracellular organelle lumen,	structural constituent of ribosome, structural molecule activity,
RRP1B	ribosomal RNA processing 1 homolog B (S. cerevisiae)	rRNA processing, RNA processing, rRNA metabolic process, ribonucleoprotein complex biogenesis, ncRNA processing, ncRNA metabolic process, ribosome biogenesis,	nucleolus, cytosol, ribonucleoprotein complex, preribosome, preribosome, small subunit precursor, membrane-enclosed lumen, nuclear lumen, non-membrane-bounded organelle, intracellular non-membrane-bounded organelle, organelle lumen, intracellular organelle lumen,
RRP8	ribosomal RNA processing 8, methyltransferase, homolog (yeast)	rRNA processing, RNA processing, rRNA metabolic process, ribonucleoprotein complex biogenesis, ncRNA processing, ncRNA metabolic process, ribosome biogenesis,	nucleolus, membrane-enclosed lumen, nuclear lumen, non-membrane-bounded organelle, intracellular non-membrane-bounded organelle, organelle lumen, intracellular organelle lumen,
RPL35	ribosomal protein L35; ribosomal protein L35 pseudogene 1; ribosomal protein L35 pseudogene 2	translation, translational elongation,	nucleolus, cytosol, ribosome, large ribosomal subunit, cytosolic large ribosomal subunit, cytosolic ribosome, ribonucleoprotein complex, membrane-enclosed lumen, nuclear lumen, ribosomal subunit, non-membrane-bounded organelle, intracellular non-membrane-bounded organelle, organelle lumen, cytosolic part, intracellular organelle lumen,	RNA binding, mRNA binding, structural constituent of ribosome, structural molecule activity,
RPL3	ribosomal protein L3; similar to 60S ribosomal protein L3 (L4)	translation, translational elongation,	nucleolus, cytosol, ribosome, large ribosomal subunit, cytosolic large ribosomal subunit, cytosolic ribosome, ribonucleoprotein complex, membrane-enclosed lumen, nuclear lumen, ribosomal subunit, non-membrane-bounded organelle, intracellular non-membrane-bounded organelle, organelle lumen, cytosolic part, intracellular organelle lumen,	RNA binding, structural constituent of ribosome, structural molecule activity,
RPL5	ribosomal protein L5 pseudogene 34; ribosomal protein L5 pseudogene 1; ribosomal protein L5	rRNA processing, RNA processing, translation, translational elongation, rRNA metabolic process, ribonucleoprotein complex biogenesis, ncRNA processing, ncRNA metabolic process, ribosome biogenesis, ribosomal large subunit biogenesis,	nucleolus, cytosol, ribosome, large ribosomal subunit, cytosolic large ribosomal subunit, cytosolic ribosome, ribonucleoprotein complex, membrane-enclosed lumen, nuclear lumen, ribosomal subunit, non-membrane-bounded organelle, intracellular non-membrane-bounded organelle, organelle lumen, cytosolic part, intracellular organelle lumen,	RNA binding, structural constituent of ribosome, structural molecule activity, 5S rRNA binding, rRNA binding,
RPS13	ribosomal protein S13 pseudogene 8; ribosomal protein S13; ribosomal protein S13 pseudogene 2	translation, translational elongation, negative regulation of macromolecule metabolic process, negative regulation of RNA splicing, regulation of RNA splicing, negative regulation of nucleobase, nucleoside, nucleotide and nucleic acid metabolic process, negative regulation of nitrogen compound metabolic process, regulation of RNA metabolic process, negative regulation of RNA metabolic process,	nucleolus, cytosol, ribosome, small ribosomal subunit, cytosolic ribosome, cytosolic small ribosomal subunit, ribonucleoprotein complex, membrane-enclosed lumen, nuclear lumen, ribosomal subunit, non-membrane-bounded organelle, intracellular non-membrane-bounded organelle, organelle lumen, cytosolic part, intracellular organelle lumen,	RNA binding, mRNA binding, structural constituent of ribosome, structural molecule activity,
RPS3A	ribosomal protein S3A pseudogene 5; ribosomal protein S3a pseudogene 47; ribosomal protein S3a pseudogene 49; ribosomal protein S3A; hypothetical LOC100131699; hypothetical LOC100130107	translation, translational initiation, translational elongation, induction of apoptosis, regulation of cell death, positive regulation of cell death, induction of programmed cell death, regulation of apoptosis, positive regulation of apoptosis, regulation of programmed cell death, positive regulation of programmed cell death,	nucleolus, cytosol, ribosome, small ribosomal subunit, cytosolic ribosome, cytosolic small ribosomal subunit, ribonucleoprotein complex, membrane-enclosed lumen, nuclear lumen, ribosomal subunit, non-membrane-bounded organelle, intracellular non-membrane-bounded organelle, organelle lumen, cytosolic part, intracellular organelle lumen,	RNA binding, structural constituent of ribosome, structural molecule activity,
RPS9	ribosomal protein S9; ribosomal protein S9 pseudogene 4	translation, translational elongation, positive regulation of cell proliferation, regulation of cell proliferation,	nucleolus, cytosol, ribosome, small ribosomal subunit, cytosolic ribosome, cytosolic small ribosomal subunit, ribonucleoprotein complex, membrane-enclosed lumen, nuclear lumen, ribosomal subunit, non-membrane-bounded organelle, intracellular non-membrane-bounded organelle, organelle lumen, cytosolic part, intracellular organelle lumen,	RNA binding, structural constituent of ribosome, structural molecule activity, rRNA binding, translation regulator activity,
SURF6	surfeit 6	ribonucleoprotein complex biogenesis, ribosome biogenesis,	granular component, nucleoplasm, nucleolus, membrane-enclosed lumen, nuclear lumen, non-membrane-bounded organelle, intracellular non-membrane-bounded organelle, organelle lumen, nucleoplasm part, nucleolar part, intracellular organelle lumen,	DNA binding, RNA binding,
TEX10	testis expressed 10		nucleolus, integral to membrane, intrinsic to membrane, membrane-enclosed lumen, nuclear lumen, non-membrane-bounded organelle, intracellular non-membrane-bounded organelle, organelle lumen, intracellular organelle lumen,
USP36	ubiquitin specific peptidase 36	proteolysis, ubiquitin-dependent protein catabolic process, macromolecule catabolic process, modification-dependent protein catabolic process, protein catabolic process, modification-dependent macromolecule catabolic process, cellular protein catabolic process, cellular macromolecule catabolic process, proteolysis involved in cellular protein catabolic process,	nucleolus, membrane-enclosed lumen, nuclear lumen, non-membrane-bounded organelle, intracellular non-membrane-bounded organelle, organelle lumen, intracellular organelle lumen,	ubiquitin thiolesterase activity, peptidase activity, cysteine-type peptidase activity, thiolester hydrolase activity, peptidase activity, acting on L-amino acid peptides,
ZNF22	zinc finger protein 22 (KOX 15)	transcription, odontogenesis, regulation of transcription,	nucleolus, membrane-enclosed lumen, nuclear lumen, non-membrane-bounded organelle, intracellular non-membrane-bounded organelle, organelle lumen, intracellular organelle lumen,	DNA binding, zinc ion binding, ion binding, cation binding, metal ion binding, transition metal ion binding,
ASH2L	ash2 (absent, small, or homeotic)-like (Drosophila)	immune system development,transcription, transcription: DNA-dependent, regulation of transcription, DNA-dependent, transcription from RNA polymerase II promoter, hemopoiesis, RNA biosynthetic process, cellular response to DNA damage stimulus, regulation of transcription, hemopoietic or lymphoid organ development, regulation of RNA metabolic process,	nucleoplasm, membrane-enclosed lumen, nuclear lumen, methyltransferase complex, histone methyltransferase complex, organelle lumen, nucleoplasm part, intracellular organelle lumen,	DNA binding, zinc ion binding, transcription regulator activity, ion binding, cation binding, metal ion binding, transition metal ion binding,
C3orf17	chromosome 3 open reading frame 17		integral to membrane, intrinsic to membrane,
CENPC1	centromere protein C 1		chromosome, centromeric region, kinetochore, condensed chromosome kinetochore, condensed chromosome, centromeric region, condensed chromosome, chromosome, non-membrane-bounded organelle, intracellular non-membrane-bounded organelle, chromosomal part,	DNA binding,
CENPV	centromere protein V	M phase of mitotic cell cycle, mitotic cell cycle, M phase, nuclear division, DNA packaging, chromatin organization, chromatin assembly or disassembly, chromatin remodeling, cell cycle, mitosis, chromatin modification, cell cycle process, cell cycle phase, chromatin remodeling at centromere, chromatin assembly, heterochromatin formation, centromeric heterochromatin formation, regulation of cytoki…	chromosome, centromeric region, kinetochore, condensed chromosome kinetochore, condensed chromosome, centromeric region, condensed chromosome, chromosome, spindle, cytoskeleton, microtubule cytoskeleton, non-membrane-bounded organelle, intracellular non-membrane-bounded organelle, chromosomal part, cytoskeletal part, spindle midzone,	carbon-sulfur lyase activity,
DDX10	DEAD (Asp-Glu-Ala-Asp) box polypeptide 10			nucleotide binding, nucleoside binding, purine nucleoside binding, RNA binding, RNA helicase activity, helicase activity, ATP binding, ATP-dependent helicase activity, ATPase activity, purine nucleotide binding, adenyl nucleotide binding, ribonucleotide binding, purine ribonucleotide binding, adenyl ribonucleotide binding, ATPase activity, coupled, purine NTP-dependent helicase activity,
DDX18	DEAD (Asp-Glu-Ala-Asp) box polypeptide 18			nucleotide binding, nucleoside binding, purine nucleoside binding, RNA binding, RNA helicase activity, ATP-dependent RNA helicase activity, helicase activity, ATP binding, ATP-dependent helicase activity, RNA-dependent ATPase activity, ATPase activity, purine nucleotide binding, adenyl nucleotide binding, ribonucleotide binding, purine ribonucleotide binding, adenyl ribonucleotide binding, ATPase…
DDX27	DEAD (Asp-Glu-Ala-Asp) box polypeptide 27			nucleotide binding, nucleoside binding, purine nucleoside binding, helicase activity, ATP binding, ATP-dependent helicase activity, ATPase activity, purine nucleotide binding, adenyl nucleotide binding, ribonucleotide binding, purine ribonucleotide binding, adenyl ribonucleotide binding, ATPase activity, coupled, purine NTP-dependent helicase activity,
DNTTIP2	deoxynucleotidyltransferase, terminal, interacting protein 2	transcription, regulation of transcription,
EPB41L5	erythrocyte membrane protein band 4.1 like 5	mesoderm development, axial mesoderm development, paraxial mesoderm development,	cytoskeleton, plasma membrane, adherens junction, extrinsic to membrane, cell junction, non-membrane-bounded organelle, intracellular non-membrane-bounded organelle, plasma membrane part, anchoring junction,	cytoskeletal protein binding,
GLYR1	cytokine-like nuclear factor n-pac	monosaccharide metabolic process, glucose metabolic process, glucose catabolic process, pentose-phosphate shunt, coenzyme metabolic process, oxidoreduction coenzyme metabolic process, NADP metabolic process, nicotinamide metabolic process, alkaloid metabolic process, carbohydrate catabolic process, hexose metabolic process, hexose catabolic process, pyridine nucleotide metabolic process, secondar…		DNA binding, phosphogluconate dehydrogenase (decarboxylating) activity, cofactor binding, coenzyme binding,
GZF1	GDNF-inducible zinc finger protein 1	negative regulation of transcription from RNA polymerase II promoter, urogenital system development, metanephros development, ureteric bud development, branching involved in ureteric bud morphogenesis, morphogenesis of a branching structure, kidney development, morphogenesis of an epithelium, transcription, regulation of transcription, DNA-dependent, regulation of transcription from RNA polymeras…		DNA binding, zinc ion binding, ion binding, cation binding, metal ion binding, transition metal ion binding,
H2AFX	H2A histone family, member X	cell cycle checkpoint, DNA damage checkpoint, M phase, double-strand break repair via homologous recombination, recombinational repair, DNA metabolic process, DNA repair, regulation of DNA repair, double-strand break repair, DNA recombination, DNA packaging, chromatin organization, chromatin assembly or disassembly, nucleosome assembly, response to DNA damage stimulus, cell cycle, meiosis, intrac…	nuclear chromosome, chromatin, nucleosome, nuclear chromatin, heterochromatin, sex chromosome, male germ cell nucleus, sex chromatin, XY body, nucleoplasm, replication fork, chromosome, nuclear heterochromatin, membrane-enclosed lumen, nuclear lumen, protein-DNA complex, germ cell nucleus, non-membrane-bounded organelle, intracellular non-membrane-bounded organelle, organelle lumen, chromosomal p…	DNA binding, damaged DNA binding, enzyme binding, histone binding,
HIST1H2AG	histone cluster 1, H2ag; histone cluster 1, H2ah; histone cluster 1, H2ai; histone cluster 1, H2ak; histone cluster 1, H2al; histone cluster 1, H2am	DNA packaging, chromatin organization, chromatin assembly or disassembly, nucleosome assembly, chromatin assembly, cellular macromolecular complex subunit organization, cellular macromolecular complex assembly, nucleosome organization, macromolecular complex subunit organization, chromosome organization, macromolecular complex assembly, protein-DNA complex assembly,	chromatin, nucleosome, chromosome, protein-DNA complex, non-membrane-bounded organelle, intracellular non-membrane-bounded organelle, chromosomal part,	DNA binding,
HNRNPCL1	heterogeneous nuclear ribonucleoprotein C-like; heterogeneous nuclear ribonucleoprotein C-like 1; similar to Heterogeneous nuclear ribonucleoprotein C-like dJ845O24.4 (hnRNP core protein C-like)		ribonucleoprotein complex,	nucleotide binding, RNA binding,
HP1BP3	heterochromatin protein 1, binding protein 3	DNA packaging, chromatin organization, chromatin assembly or disassembly, nucleosome assembly, chromatin assembly, cellular macromolecular complex subunit organization, cellular macromolecular complex assembly, nucleosome organization, macromolecular complex subunit organization, chromosome organization, macromolecular complex assembly, protein-DNA complex assembly,	chromatin, nucleosome, chromosome, protein-DNA complex, non-membrane-bounded organelle, intracellular non-membrane-bounded organelle, chromosomal part,	DNA binding,
LARP1	La ribonucleoprotein domain family, member 1			RNA binding,
LIN28B	lin-28 homolog B (C. elegans)	regulation of transcription, DNA-dependent, RNA processing, RNA catabolic process, macromolecule catabolic process, response to organic substance, miRNA metabolic process, miRNA catabolic process, negative regulation of macromolecule metabolic process, posttranscriptional regulation of gene expression, negative regulation of gene expression, posttranscriptional gene silencing, gene silencing, gen…		DNA binding, RNA binding, zinc ion binding, ion binding, cation binding, metal ion binding, transition metal ion binding,
MRPL43	mitochondrial ribosomal protein L43	translation,	organellar ribosome, organellar large ribosomal subunit, mitochondrion, mitochondrial matrix, mitochondrial ribosome, mitochondrial large ribosomal subunit, ribosome, large ribosomal subunit, ribonucleoprotein complex, membrane-enclosed lumen, mitochondrial lumen, ribosomal subunit, non-membrane-bounded organelle, intracellular non-membrane-bounded organelle, organelle lumen, mitochondrial part, …	structural constituent of ribosome, structural molecule activity, translation regulator activity,
MRPS5	mitochondrial ribosomal protein S5	GO:0006412~translation,	mitochondrion, ribosome, ribonucleoprotein complex, non-membrane-bounded organelle, intracellular non-membrane-bounded organelle,	RNA binding, structural constituent of ribosome, structural molecule activity,
NMNAT1	nicotinamide nucleotide adenylyltransferase 1	coenzyme metabolic process, oxidoreduction coenzyme metabolic process, vitamin metabolic process, water-soluble vitamin metabolic process, nicotinamide metabolic process, coenzyme biosynthetic process, vitamin biosynthetic process, nucleotide biosynthetic process, NAD biosynthetic process, alkaloid metabolic process, regulation of cell death, nicotinamide nucleotide biosynthetic process, pyridine…		nucleotide binding, magnesium ion binding, nicotinamide-nucleotide adenylyltransferase activity, nucleoside binding, purine nucleoside binding, nicotinate-nucleotide adenylyltransferase activity, ATP binding, zinc ion binding, nucleotidyltransferase activity, purine nucleotide binding, adenyl nucleotide binding, ribonucleotide binding, purine ribonucleotide binding, adenyl ribonucleotide binding,…
PAPD5	PAP associated domain containing 5	M phase of mitotic cell cycle, mitotic cell cycle, M phase, nuclear division, DNA metabolic process, DNA replication, cell cycle, mitosis, cell cycle process, cell cycle phase, organelle fission, cell division,		DNA binding, DNA-directed DNA polymerase activity, nucleotidyltransferase activity, DNA polymerase activity,
PELP1	proline, glutamate and leucine rich protein 1	transcription,
RPL10A	ribosomal protein L10a pseudogene 6; ribosomal protein L10a; ribosomal protein L10a pseudogene 9	RNA processing, translation, translational elongation,	cytosol, ribosome, ribonucleoprotein complex, non-membrane-bounded organelle, intracellular non-membrane-bounded organelle,	RNA binding, structural constituent of ribosome, structural molecule activity,
RPL12	ribosomal protein L12 pseudogene 2; ribosomal protein L12 pseudogene 32; ribosomal protein L12 pseudogene 35; ribosomal protein L12 pseudogene 19; ribosomal protein L12 pseudogene 6; ribosomal protein L12; ribosomal protein L12 pseudogene 14	translation, translational elongation,	cytosol, ribosome, ribonucleoprotein complex, non-membrane-bounded organelle, intracellular non-membrane-bounded organelle,	RNA binding, structural constituent of ribosome, structural molecule activity,
RPL13	ribosomal protein L13 pseudogene 12; ribosomal protein L13	translation, translational elongation,	cytosol, ribosome, cytosolic ribosome, ribonucleoprotein complex, non-membrane-bounded organelle, intracellular non-membrane-bounded organelle,	RNA binding, structural constituent of ribosome, structural molecule activity,
RPL13A	ribosomal protein L13a pseudogene 7; ribosomal protein L13a pseudogene 5; ribosomal protein L13a pseudogene 16; ribosomal protein L13a; ribosomal protein L13a pseudogene 18	translation, translational elongation,	cytosol, ribosome, large ribosomal subunit, ribonucleoprotein complex, ribosomal subunit, non-membrane-bounded organelle, intracellular non-membrane-bounded organelle,	structural constituent of ribosome, structural molecule activity,
RPL14	ribosomal protein L14	rRNA processing, RNA processing, translation, translational elongation, rRNA metabolic process, ribonucleoprotein complex biogenesis, ncRNA processing, ncRNA metabolic process, ribosome biogenesis, ribosomal large subunit biogenesis,	cytosol, ribosome, large ribosomal subunit, cytosolic large ribosomal subunit, cytosolic ribosome, ribonucleoprotein complex, ribosomal subunit, non-membrane-bounded organelle, intracellular non-membrane-bounded organelle, cytosolic part,	RNA binding, structural constituent of ribosome, structural molecule activity,
RPL15	ribosomal protein L15 pseudogene 22; ribosomal protein L15 pseudogene 18; ribosomal protein L15 pseudogene 17; ribosomal protein L15 pseudogene 3; ribosomal protein L15 pseudogene 7; ribosomal protein L15	translation, translational elongation,	cytosol, ribosome, ribonucleoprotein complex, non-membrane-bounded organelle, intracellular non-membrane-bounded organelle,	RNA binding, structural constituent of ribosome, structural molecule activity,
RPL17	ribosomal protein L17 pseudogene 22; ribosomal protein L17 pseudogene 36; ribosomal protein L17 pseudogene 20; similar to ribosomal protein L17; ribosomal protein L17 pseudogene 33; ribosomal protein L17 pseudogene 34; ribosomal protein L17 pseudogene 9; ribosomal protein L17; ribosomal protein L17 pseudogene 18; ribosomal protein L17 pseudogene 7; ribosomal protein L17 pseudogene 39	translation, translational elongation,	cytosol, ribosome, large ribosomal subunit, ribonucleoprotein complex, ribosomal subunit, non-membrane-bounded organelle, intracellular non-membrane-bounded organelle,	structural constituent of ribosome, structural molecule activity,
RPL18A	ribosomal protein L18a pseudogene 6; ribosomal protein L18a	GO:0006412~translation,GO:0006414~translational elongation,	cytosol, ribosome, large ribosomal subunit, cytosolic large ribosomal subunit, cytosolic ribosome, ribonucleoprotein complex, ribosomal subunit, non-membrane-bounded organelle, intracellular non-membrane-bounded organelle, cytosolic part,	RNA binding, structural constituent of ribosome, structural molecule activity,
RPL19	ribosomal protein L19; ribosomal protein L19 pseudogene 12	translation, translational elongation,	cytosol, ribosome, large ribosomal subunit, cytosolic large ribosomal subunit, cytosolic ribosome, ribonucleoprotein complex, ribosomal subunit, non-membrane-bounded organelle, intracellular non-membrane-bounded organelle, cytosolic part,	RNA binding, structural constituent of ribosome, structural molecule activity,
RPL23A	ribosomal protein L23a pseudogene 63; ribosomal protein L23a pseudogene 75; ribosomal protein L23a pseudogene 37; ribosomal protein L23a pseudogene 65; ribosomal protein L23a pseudogene 43; ribosomal protein L23a pseudogene 44; ribosomal protein L23a	translation, translational elongation,	cytosol, ribosome, large ribosomal subunit, cytosolic large ribosomal subunit, cytosolic ribosome, ribonucleoprotein complex, ribosomal subunit, non-membrane-bounded organelle, intracellular non-membrane-bounded organelle, cytosolic part,	nucleotide binding, RNA binding, structural constituent of ribosome, structural molecule activity, rRNA binding,
RPL26L1	ribosomal protein L26-like 1	translation, translational elongation,	cytosol, ribosome, large ribosomal subunit, ribonucleoprotein complex, ribosomal subunit, non-membrane-bounded organelle, intracellular non-membrane-bounded organelle,	structural constituent of ribosome, structural molecule activity,
RPL27	ribosomal protein L27	translation, translational elongation,	cytosol, ribosome, ribonucleoprotein complex, non-membrane-bounded organelle, intracellular non-membrane-bounded organelle,	structural constituent of ribosome, structural molecule activity,
RPL36AL	ribosomal protein L36a-like	translation,	ribosome, ribonucleoprotein complex, non-membrane-bounded organelle, intracellular non-membrane-bounded organelle,	structural constituent of ribosome, structural molecule activity,
RPL37A	ribosomal protein L37a	translation, translational elongation,	cytosol, ribosome, ribonucleoprotein complex, non-membrane-bounded organelle, intracellular non-membrane-bounded organelle,	structural constituent of ribosome, structural molecule activity, zinc ion binding, ion binding, cation binding,metal ion binding, transition metal ion binding,
RPL3L	ribosomal protein L3-like	translation, translational elongation,	cytosol, ribosome, ribonucleoprotein complex, non-membrane-bounded organelle, intracellular non-membrane-bounded organelle,	RNA binding, structural constituent of ribosome, structural molecule activity,
RPL4	ribosomal protein L4; ribosomal protein L4 pseudogene 5; ribosomal protein L4 pseudogene 4	translation, translational elongation,	cytosol, ribosome, large ribosomal subunit, cytosolic large ribosomal subunit, cytosolic ribosome, ribonucleoprotein complex, ribosomal subunit, non-membrane-bounded organelle, intracellular non-membrane-bounded organelle, cytosolic part,	RNA binding, structural constituent of ribosome, structural molecule activity,
RPL6	ribosomal protein L6 pseudogene 27; ribosomal protein L6 pseudogene 19; ribosomal protein L6; ribosomal protein L6 pseudogene 10	regulation of transcription, DNA-dependent, translation, translational elongation, regulation of transcription, regulation of RNA metabolic process,	cytosol, ribosome, large ribosomal subunit, cytosolic large ribosomal subunit, cytosolic ribosome, ribonucleoprotein complex, ribosomal subunit, non-membrane-bounded organelle, intracellular non-membrane-bounded organelle, cytosolic part,	DNA binding, RNA binding, structural constituent of ribosome, structural molecule activity,
RPL7	ribosomal protein L7 pseudogene 26; ribosomal protein L7 pseudogene 16; ribosomal protein L7; ribosomal protein L7 pseudogene 32; ribosomal protein L7 pseudogene 23; ribosomal protein L7 pseudogene 24; ribosomal protein L7 pseudogene 20	rRNA processing, RNA processing, translation, translational elongation, rRNA metabolic process, ribonucleoprotein complex biogenesis, ncRNA processing, ncRNA metabolic process, ribosome biogenesis, ribosomal large subunit biogenesis,	cytosol, ribosome, large ribosomal subunit, cytosolic large ribosomal subunit, cytosolic ribosome, ribonucleoprotein complex, ribosomal subunit, non-membrane-bounded organelle, intracellular non-membrane-bounded organelle, cytosolic part,	DNA binding, RNA binding, mRNA binding, structural constituent of ribosome, structural molecule activity, transcription regulator activity, identical protein binding, protein homodimerization activity, protein dimerization activity,
RPL7A	ribosomal protein L7a pseudogene 70; ribosomal protein L7a; ribosomal protein L7a pseudogene 30; ribosomal protein L7a pseudogene 66; ribosomal protein L7a pseudogene 27; ribosomal protein L7a pseudogene 11; ribosomal protein L7a pseudogene 62	translation, translational elongation, ribonucleoprotein complex biogenesis, ribosome biogenesis,	cell fraction, membrane fraction, insoluble fraction, cytosol, ribosome, polysome, large ribosomal subunit, cytosolic large ribosomal subunit, cytosolic ribosome, ribonucleoprotein complex, ribosomal subunit, polysomal ribosome, non-membrane-bounded organelle, intracellular non-membrane-bounded organelle, cytosolic part,	RNA binding,G structural constituent of ribosome, structural molecule activity,
RPL7L1	ribosomal protein L7-like 1; ribosomal protein L7 pseudogene 14; ribosomal protein L7 pseudogene 21; ribosomal protein L7 pseudogene 22; ribosomal protein L7 pseudogene 46	translation,	ribosome, large ribosomal subunit, ribonucleoprotein complex, ribosomal subunit, non-membrane-bounded organelle, intracellular non-membrane-bounded organelle,	structural constituent of ribosome, structural molecule activity, transcription regulator activity,
RPL8	ribosomal protein L8; ribosomal protein L8 pseudogene 2	translation, translational elongation,	cytosol, ribosome, large ribosomal subunit, cytosolic large ribosomal subunit, cytosolic ribosome, ribonucleoprotein complex, ribosomal subunit, non-membrane-bounded organelle, intracellular non-membrane-bounded organelle, cytosolic part,	RNA binding, structural constituent of ribosome, structural molecule activity, rRNA binding,
RPLP0	ribosomal protein, large, P0 pseudogene 2; ribosomal protein, large, P0 pseudogene 3; ribosomal protein, large, P0 pseudogene 6; ribosomal protein, large, P0	translation, translational elongation, ribonucleoprotein complex biogenesis, ribosome biogenesis,	cytosol, ribosome, large ribosomal subunit, cytosolic large ribosomal subunit, cytosolic ribosome, ribonucleoprotein complex, ribosomal subunit, non-membrane-bounded organelle, intracellular non-membrane-bounded organelle, cytosolic part,	RNA binding, structural constituent of ribosome, structural molecule activity,
RPLP2	ribosomal protein, large, P2 pseudogene 3; ribosomal protein, large, P2	translation, translational elongation,	cytosol, ribosome, large ribosomal subunit, cytosolic large ribosomal subunit, cytosolic ribosome, ribonucleoprotein complex, ribosomal subunit, non-membrane-bounded organelle, intracellular non-membrane-bounded organelle, cytosolic part,	GO:0003723~RNA binding,GO:0003735~structural constituent of ribosome,GO:0005198~structural molecule activity,
RPP14	ribonuclease P/MRP 14kDa subunit	RNA processing, tRNA metabolic process, tRNA processing, ncRNA processing, ncRNA metabolic process,		RNA binding, nuclease activity, endonuclease activity, endoribonuclease activity, ribonuclease P activity, ribonuclease activity, tRNA-specific ribonuclease activity, endoribonuclease activity, producing 5'-phosphomonoesters, endonuclease activity, active with either ribo- or deoxyribonucleic acids and producing 5'-phosphomonoesters, identical protein binding,
RPP25	ribonuclease P/MRP 25kDa subunit	RNA processing, tRNA metabolic process, tRNA processing, ncRNA processing, ncRNA metabolic process,		RNA binding, nuclease activity, endonuclease activity, endoribonuclease activity, ribonuclease P activity, ribonuclease activity, tRNA-specific ribonuclease activity, endoribonuclease activity, producing 5'-phosphomonoesters, endonuclease activity, active with either ribo- or deoxyribonucleic acids and producing 5'-phosphomonoesters,
RPS24	ribosomal protein S24	rRNA processing, RNA processing, translation, translational elongation, rRNA metabolic process, ribonucleoprotein complex biogenesis, erythrocyte homeostasis, ncRNA processing, ncRNA metabolic process, ribosome biogenesis, ribosomal small subunit biogenesis, homeostatic process, homeostasis of number of cells,	cytosol, ribosome, small ribosomal subunit, cytosolic ribosome, cytosolic small ribosomal subunit, ribonucleoprotein complex, ribosomal subunit, non-membrane-bounded organelle, intracellular non-membrane-bounded organelle, cytosolic part,	nucleotide binding, structural constituent of ribosome, structural molecule activity, translation initiation factor binding,
RPS26	ribosomal protein S26 pseudogene 38; ribosomal protein S26 pseudogene 39; ribosomal protein S26 pseudogene 35; ribosomal protein S26 pseudogene 31; ribosomal protein S26 pseudogene 20; ribosomal protein S26 pseudogene 54; ribosomal protein S26 pseudogene 2; ribosomal protein S26 pseudogene 53; ribosomal protein S26 pseudogene 25; ribosomal protein S26 pseudogene 50; ribosomal protein S26 pseudoge…	translation, translational elongation, negative regulation of macromolecule metabolic process, negative regulation of RNA splicing, regulation of RNA splicing, negative regulation of nucleobase, nucleoside, nucleotide and nucleic acid metabolic process, negative regulation of nitrogen compound metabolic process, regulation of RNA metabolic process, negative regulation of RNA metabolic process,	cytosol, ribosome, small ribosomal subunit, cytosolic ribosome, cytosolic small ribosomal subunit, ribonucleoprotein complex, ribosomal subunit, non-membrane-bounded organelle, intracellular non-membrane-bounded organelle, cytosolic part,	RNA binding, mRNA binding, structural constituent of ribosome, structural molecule activity,
RPS8	ribosomal protein S8; ribosomal protein S8 pseudogene 8; ribosomal protein S8 pseudogene 10	translation, translational elongation,	cytosol, ribosome, small ribosomal subunit, cytosolic ribosome, cytosolic small ribosomal subunit, ribonucleoprotein complex, ribosomal subunit, non-membrane-bounded organelle, intracellular non-membrane-bounded organelle, cytosolic part,	structural constituent of ribosome, structural molecule activity,
SCML1	sex comb on midleg-like 1 (Drosophila)	transcription, regulation of transcription,		DNA binding, transcription factor activity, transcription regulator activity,
WHSC1	Wolf-Hirschhorn syndrome candidate 1	chromatin organization, transcription, regulation of transcription, DNA-dependent, chromatin modification, regulation of transcription, regulation of RNA metabolic process, chromosome organization,		DNA binding, N-methyltransferase activity, zinc ion binding, protein methyltransferase activity, lysine N-methyltransferase activity, protein-lysine N-methyltransferase activity, histone-lysine N-methyltransferase activity, histone methyltransferase activity, ion binding, cation binding, metal ion binding, transition metal ion binding,
ZFP62	zinc finger protein 62 homolog (mouse)	transcription, regulation of transcription,		zinc ion binding, ion binding, cation binding, metal ion binding, transition metal ion binding,
ZNF668	zinc finger protein 668	transcription, regulation of transcription,		DNA binding, zinc ion binding, ion binding, cation binding, metal ion binding, transition metal ion binding,
ZNF800	zinc finger protein 800	transcription, regulation of transcription,		DNA binding, zinc ion binding, ion binding, cation binding, metal ion binding, transition metal ion binding,
