# Supplementary material for: Nucleophosmin integrates within the nucleolus via multi-modal interactions with proteins displaying R-rich linear motifs and rRNA
Source: eLife. 2016 Feb 2;5:e13571. doi: 10.7554/eLife.13571 (PMC4786410; doi:10.7554/eLife.13571)
Supplement: Supplementary file 3. — DOI: http://dx.doi.org/10.7554/eLife.13571.032 [file elife-13571-supp3.xlsx]

## Sheet: Gygi List
Total Possible Multivalent Arg Motifs	Total Arginines	Protein Length	% Arg	UniProt Accession	UniProt ID		% with at least 1 multivalent R-motif	0.734848
18	76	619	0.122779	Q9BRD0	BUD13_HUMAN
15	91	881	0.103292	Q8TDD1	DDX54_HUMAN
13	60	478	0.125523	Q9NZM5	GSCR2_HUMAN
11	33	204	0.161765	P61313	RL15_HUMAN
9	53	361	0.146814	O75683	SURF6_HUMAN
8	37	733	0.0504775	Q9HCM4	E41L5_HUMAN
8	196	3256	0.0601966	P46013	KI67_HUMAN
6	24	300	0.08	Q9BXY0	MAK16_HUMAN
5	43	783	0.054917	Q9NR30	DDX21_HUMAN
5	53	632	0.0838608	Q06787	FMR1_HUMAN
5	60	703	0.0853485	Q8N9T8	KRI1_HUMAN
5	31	263	0.117871	Q9BU76	MMTA2_HUMAN
5	41	427	0.0960187	P36578	RL4_HUMAN
5	27	248	0.108871	P18124	RL7_HUMAN
5	22	246	0.0894309	Q6DKI1	RL7L_HUMAN
5	68	847	0.0802834	Q8IY81	SPB1_HUMAN
5	58	685	0.0846715	Q68D10	SPT2_HUMAN
5	48	473	0.10148	Q9NQ55	SSF1_HUMAN
5	72	950	0.0757895	Q9H0D6	XRN2_HUMAN
4	58	666	0.0870871	Q8N8A6	DDX51_HUMAN
4	25	217	0.115207	Q9NY12	GAR1_HUMAN
4	54	634	0.0851735	Q9BZE4	NOG1_HUMAN
4	49	731	0.0670315	Q13823	NOG2_HUMAN
4	30	213	0.140845	Q9UGY1	NOL12_HUMAN
4	87	1365	0.0637363	O96028	NSD2_HUMAN
4	15	140	0.107143	O75817	POP7_HUMAN
4	23	208	0.110577	P62241	RS8_HUMAN
4	36	318	0.113208	Q96QD9	UIF_HUMAN
3	56	875	0.064	Q13206	DDX10_HUMAN
3	52	812	0.0640394	P46087	NOP2_HUMAN
3	26	710	0.0366197	P19338	NUCL_HUMAN
3	58	856	0.067757	O15381	NVL_HUMAN
3	71	1024	0.0693359	Q99575	POP1_HUMAN
3	45	759	0.0592885	Q9NW13	RBM28_HUMAN
3	31	211	0.146919	P26373	RL13_HUMAN
3	21	176	0.119318	Q02543	RL18A_HUMAN
3	11	156	0.0705128	P62750	RL23A_HUMAN
3	50	929	0.0538213	Q9NXF1	TEX10_HUMAN
3	74	1121	0.0660125	Q9P275	UBP36_HUMAN
2	60	943	0.0636267	Q03188	CENPC_HUMAN
2	43	547	0.0786106	Q9NY93	DDX56_HUMAN
2	27	553	0.0488246	Q49A26	GLYR1_HUMAN
2	66	748	0.0882353	Q8NCD3	HJURP_HUMAN
2	83	1096	0.0757299	Q6PKG0	LARP1_HUMAN
2	84	1328	0.063253	Q9BQG0	MBB1A_HUMAN
2	31	196	0.158163	P84098	RL19_HUMAN
2	33	407	0.0810811	Q92901	RL3L_HUMAN
2	28	257	0.108949	P62917	RL8_HUMAN
2	30	349	0.0859599	Q9H9Y2	RPF1_HUMAN
2	36	456	0.0789474	O43159	RRP8_HUMAN
2	41	365	0.112329	Q15050	RRS1_HUMAN
2	27	194	0.139175	P46781	RS9_HUMAN
2	58	619	0.0936995	Q96K58	ZN668_HUMAN
1	28	353	0.0793201	Q8TDN6	BRX1_HUMAN
1	31	567	0.0546737	Q6NW34	CC017_HUMAN
1	21	275	0.0763636	Q7Z7K6	CENPV_HUMAN
1	62	796	0.0778894	Q96GQ7	DDX27_HUMAN
1	63	851	0.0740306	Q9H8H2	DDX31_HUMAN
1	48	707	0.0678925	Q9H6R0	DHX33_HUMAN
1	44	711	0.0618847	Q9H116	GZF1_HUMAN
1	12	130	0.0923077	P0C0S8	H2A1_HUMAN
1	12	143	0.0839161	P16104	H2AX_HUMAN
1	13	293	0.0443686	O60812	HNRCL_HUMAN
1	54	730	0.0739726	P52272	HNRPM_HUMAN
1	39	894	0.0436242	Q12906	ILF3_HUMAN
1	11	129	0.0852713	Q9BRT6	LLPH_HUMAN
1	19	379	0.0501319	Q9NX58	LYAR_HUMAN
1	24	293	0.0819113	Q9BYG3	MK67I_HUMAN
1	27	681	0.0396476	O00566	MPP10_HUMAN
1	54	749	0.0720961	Q9Y3T9	NOC2L_HUMAN
1	44	800	0.055	Q8WTT2	NOC3L_HUMAN
1	21	178	0.117978	Q9Y3C1	NOP16_HUMAN
1	112	2271	0.0493175	O60287	NPA1P_HUMAN
1	43	588	0.0731293	O00541	PESC_HUMAN
1	32	430	0.0744186	P42696	RBM34_HUMAN
1	22	203	0.108374	P40429	RL13A_HUMAN
1	13	215	0.0604651	P50914	RL14_HUMAN
1	16	145	0.110345	Q9UNX3	RL26L_HUMAN
1	30	403	0.0744417	P39023	RL3_HUMAN
1	15	123	0.121951	P42766	RL35_HUMAN
1	24	297	0.0808081	P46777	RL5_HUMAN
1	22	288	0.0763889	Q02878	RL6_HUMAN
1	19	215	0.0883721	Q8N983	RM43_HUMAN
1	21	306	0.0686275	Q9H7B2	RPF2_HUMAN
1	15	199	0.0753769	Q9BUL9	RPP25_HUMAN
1	17	220	0.0772727	O95707	RPP29_HUMAN
1	12	363	0.0330579	O75818	RPP40_HUMAN
1	52	758	0.0686016	Q14684	RRP1B_HUMAN
1	14	151	0.0927152	P62277	RS13_HUMAN
1	13	133	0.0977444	P62847	RS24_HUMAN
1	16	115	0.13913	P62854	RS26_HUMAN
1	35	430	0.0813953	P82675	RT05_HUMAN
1	37	687	0.0538574	Q9NVU7	SDA1_HUMAN
1	44	755	0.0582781	Q96HI0	SENP5_HUMAN
1	41	756	0.0542328	Q5QJE6	TDIF2_HUMAN
1	37	664	0.0557229	Q2TB10	ZN800_HUMAN
1	20	224	0.0892857	P17026	ZNF22_HUMAN
0	22	628	0.0350318	Q9UBL3	ASH2L_HUMAN
0	31	670	0.0462687	Q9NVP1	DDX18_HUMAN
0	43	859	0.0500582	Q9GZR7	DDX24_HUMAN
0	30	549	0.0546448	Q9BVP2	GNL3_HUMAN
0	29	553	0.0524412	Q5SSJ5	HP1B3_HUMAN
0	31	648	0.0478395	Q15397	K0020_HUMAN
0	15	250	0.06	Q6ZN17	LN28B_HUMAN
0	24	465	0.0516129	Q8IUF8	MINA_HUMAN
0	36	600	0.06	Q9P2K5	MYEF2_HUMAN
0	9	180	0.05	Q9Y221	NIP7_HUMAN
0	16	279	0.0573477	Q9HAN9	NMNA1_HUMAN
0	8	294	0.0272109	P06748	NPM_HUMAN
0	9	178	0.0505618	O75607	NPM3_HUMAN
0	19	260	0.0730769	O95478	NSA2_HUMAN
0	33	572	0.0576923	Q8NDF8	PAPD5_HUMAN
0	47	1130	0.0415929	Q8IZL8	PELP1_HUMAN
0	16	163	0.0981595	Q969H6	POP5_HUMAN
0	25	422	0.0592417	Q9GZR2	REXO4_HUMAN
0	11	217	0.0506912	P62906	RL10A_HUMAN
0	10	165	0.0606061	P30050	RL12_HUMAN
0	15	184	0.0815217	P18621	RL17_HUMAN
0	30	490	0.0612245	O76021	RL1D1_HUMAN
0	13	136	0.0955882	P61353	RL27_HUMAN
0	12	106	0.113208	Q969Q0	RL36L_HUMAN
0	7	92	0.076087	P61513	RL37A_HUMAN
0	23	266	0.0864662	P62424	RL7A_HUMAN
0	13	317	0.0410095	P05388	RLA0_HUMAN
0	2	115	0.0173913	P05387	RLA2_HUMAN
0	14	163	0.0858896	Q9UHA3	RLP24_HUMAN
0	19	163	0.116564	Q8N5L8	RP25L_HUMAN
0	4	124	0.0322581	O95059	RPP14_HUMAN
0	20	283	0.0706714	P78345	RPP38_HUMAN
0	14	264	0.0530303	P61247	RS3A_HUMAN
0	16	329	0.0486322	Q9UN30	SCML1_HUMAN
0	52	900	0.0577778	Q8NB50	ZFP62_HUMAN

## Sheet: Swiss-Prot
Total Possible Multivalent Arg Motifs	Total Arginines	Protein Length	% Arg	UniProt Accession	UniProt ID		% with at least 1 multivalent R-motif	0.438469
197	435	1943	0.223881	Q07283	TRHY_HUMAN
119	468	2752	0.170058	Q9UQ35	SRRM2_HUMAN
60	144	904	0.159292	Q8IYB3	SRRM1_HUMAN
57	187	1984	0.094254	Q68DN1	CB016_HUMAN
56	159	2426	0.06554	P18583	SON_HUMAN
49	225	1382	0.162808	Q14152	EIF3A_HUMAN
49	280	1668	0.167866	Q5T200	ZC3HD_HUMAN
44	173	1649	0.104912	Q9P1Y6	PHRF1_HUMAN
42	127	1001	0.126873	Q8IXT5	RB12B_HUMAN
39	119	1299	0.0916089	Q6Y7W6	PERQ2_HUMAN
39	453	4684	0.0967122	Q15149	PLEC_HUMAN
36	97	494	0.196356	Q08170	SRSF4_HUMAN
35	308	3267	0.0942761	Q15772	SPEG_HUMAN
35	133	715	0.186014	B3KS81	SRRM5_HUMAN
35	175	1951	0.0896976	P49750	YLPM1_HUMAN
34	119	1491	0.0798122	Q96QZ7	MAGI1_HUMAN
33	252	2017	0.124938	Q5TZA2	CROCC_HUMAN
32	126	707	0.178218	Q9NQR7	CC177_HUMAN
31	327	3477	0.0940466	Q8IZT6	ASPM_HUMAN
31	99	918	0.107843	Q9NQS7	INCE_HUMAN
30	108	674	0.160237	Q8N2M8	CLASR_HUMAN
28	100	820	0.121951	Q9BUQ8	DDX23_HUMAN
28	433	5090	0.0850688	P58107	EPIPL_HUMAN
28	149	1462	0.101915	P30414	NKTR_HUMAN
27	118	1045	0.112919	Q9NS56	TOPRS_HUMAN
26	117	1123	0.104185	P78332	RBM6_HUMAN
26	331	3674	0.0900925	Q9NRC6	SPTN5_HUMAN
25	232	2715	0.0854512	Q9UMN6	KMT2B_HUMAN
25	91	749	0.121495	Q14244	MAP7_HUMAN
25	101	915	0.110383	Q15424	SAFB1_HUMAN
25	1640	34350	0.0477438	Q8WZ42	TITIN_HUMAN
24	72	499	0.144289	P49760	CLK2_HUMAN
24	114	955	0.119372	Q9Y2W1	TR150_HUMAN
23	78	611	0.12766	P23588	IF4B_HUMAN
23	257	3664	0.0701419	Q96T58	MINT_HUMAN
23	118	977	0.120778	Q96T37	RBM15_HUMAN
22	270	3530	0.0764873	Q9UKN7	MYO15_HUMAN
21	201	2505	0.0802395	O00555	CAC1A_HUMAN
21	111	1239	0.0895884	O95819	M4K4_HUMAN
21	214	1995	0.107268	Q7Z406	MYH14_HUMAN
21	104	754	0.137931	Q13427	PPIG_HUMAN
21	178	2896	0.0614641	Q9Y520	PRC2C_HUMAN
21	112	1374	0.0815138	Q9NRR4	RNC_HUMAN
21	83	1147	0.0723627	O95104	SFR15_HUMAN
21	114	1034	0.110251	Q9NWH9	SLTM_HUMAN
21	86	516	0.166667	Q6ZRH9	YB011_HUMAN
20	114	920	0.123913	Q9NYF8	BCLF1_HUMAN
20	262	3926	0.0667346	Q9UPA5	BSN_HUMAN
20	216	2252	0.0959147	H7BZ55	CROL3_HUMAN
20	440	4061	0.108348	P20930	FILA_HUMAN
20	81	1035	0.0782609	O75420	PERQ1_HUMAN
20	135	1411	0.0956768	Q9UQ26	RIMS2_HUMAN
19	141	1824	0.0773026	P55196	AFAD_HUMAN
19	86	793	0.108449	Q05682	CALD1_HUMAN
19	70	512	0.136719	Q9Y6R9	CCD61_HUMAN
19	77	629	0.122417	Q96B18	DACT3_HUMAN
19	65	574	0.11324	A6NEF3	GG6L4_HUMAN
19	58	463	0.12527	A6NEY3	GG6L3_HUMAN
19	123	1007	0.122145	Q13523	PRP4B_HUMAN
19	96	890	0.107865	Q8NDT2	RB15B_HUMAN
19	63	282	0.223404	Q9BRL6	SRSF8_HUMAN
18	159	2063	0.0770722	Q96PE2	ARHGH_HUMAN
18	76	619	0.122779	Q9BRD0	BUD13_HUMAN
18	116	1083	0.10711	Q9UPN4	CP131_HUMAN
18	101	1502	0.0672437	Q9UKJ3	GPTC8_HUMAN
18	101	1538	0.0656697	Q12766	HMGX3_HUMAN
18	71	392	0.181122	Q9Y383	LC7L2_HUMAN
18	58	503	0.115308	Q8NC56	LEMD2_HUMAN
18	97	841	0.115339	Q3KQU3	MA7D1_HUMAN
18	137	1639	0.0835876	Q9UFD9	RIM3A_HUMAN
18	93	685	0.135766	Q9Y252	RNF6_HUMAN
18	241	2564	0.0939938	Q9H254	SPTN4_HUMAN
18	103	611	0.168576	A7MD48	SRRM4_HUMAN
17	71	656	0.108232	Q9P0U4	CXXC1_HUMAN
17	183	2240	0.0816964	Q9BTC0	DIDO1_HUMAN
17	93	805	0.115528	Q8TF01	PNISR_HUMAN
17	125	1792	0.0697545	Q7Z6E9	RBBP6_HUMAN
17	137	1639	0.0835876	A6NNM3	RIM3B_HUMAN
17	137	1639	0.0835876	A6NJZ7	RIM3C_HUMAN
17	52	305	0.170492	Q15287	RNPS1_HUMAN
17	76	434	0.175115	Q7L4I2	RSRC2_HUMAN
17	134	1565	0.085623	O15061	SYNEM_HUMAN
17	64	288	0.222222	P62995	TRA2B_HUMAN
17	151	2279	0.0662571	Q5VUA4	ZN318_HUMAN
17	272	3925	0.0692994	Q96JG9	ZN469_HUMAN
16	87	695	0.12518	Q02040	AK17A_HUMAN
16	208	2303	0.090317	O95996	APC2_HUMAN
16	181	2353	0.0769231	O95180	CAC1H_HUMAN
16	79	795	0.0993711	P21127	CD11B_HUMAN
16	118	976	0.120902	C9J069	CI172_HUMAN
16	74	678	0.109145	C9JLR9	CK095_HUMAN
16	83	638	0.130094	P49761	CLK3_HUMAN
16	34	198	0.171717	P0DI83	NARR_HUMAN
16	541	7968	0.0678966	Q5VST9	OBSCN_HUMAN
16	168	1692	0.0992908	Q86UR5	RIMS1_HUMAN
16	148	1242	0.119163	A8K8P3	SFI1_HUMAN
16	58	238	0.243697	Q16629	SRSF7_HUMAN
16	94	1303	0.0721412	Q9UPT8	ZC3H4_HUMAN
16	111	953	0.116474	Q86VM9	ZCH18_HUMAN
16	156	1829	0.0852925	O15015	ZN646_HUMAN
15	158	1476	0.107046	A6NC98	CC88B_HUMAN
15	62	531	0.116761	Q9Y3X0	CCDC9_HUMAN
15	117	1512	0.077381	Q14004	CDK13_HUMAN
15	123	1256	0.0979299	Q1MSJ5	CSPP1_HUMAN
15	91	881	0.103292	Q8TDD1	DDX54_HUMAN
15	144	2002	0.0719281	Q7RTP6	MICA3_HUMAN
15	247	3336	0.0740408	O95613	PCNT_HUMAN
15	179	2157	0.0829856	P48634	PRC2A_HUMAN
15	63	798	0.0789474	Q9UBK2	PRGC1_HUMAN
15	80	1007	0.0794439	Q5T8P6	RBM26_HUMAN
15	151	1491	0.101274	Q9P227	RHG23_HUMAN
15	140	2564	0.0546022	Q9BYW2	SETD2_HUMAN
15	202	3230	0.0625387	Q6ZRS2	SRCAP_HUMAN
15	76	508	0.149606	Q8WXA9	SREK1_HUMAN
15	51	262	0.194656	O75494	SRS10_HUMAN
15	40	164	0.243902	P84103	SRSF3_HUMAN
15	262	2365	0.110782	Q9H2D6	TARA_HUMAN
15	118	1190	0.0991597	Q9UDY2	ZO2_HUMAN
15	73	725	0.10069	Q96SZ4	ZSC10_HUMAN
14	165	2663	0.0619602	Q6UB99	ANR11_HUMAN
14	62	526	0.117871	Q9UK58	CCNL1_HUMAN
14	62	605	0.102479	Q9UIS9	MBD1_HUMAN
14	79	579	0.136442	Q9HCD5	NCOA5_HUMAN
14	121	1377	0.0878722	Q86UU1	PHLB1_HUMAN
14	90	546	0.164835	Q5VTL8	PR38B_HUMAN
14	109	1227	0.0888346	Q92620	PRP16_HUMAN
14	111	843	0.131673	P49756	RBM25_HUMAN
14	124	1067	0.116214	Q8N7X1	RMXL3_HUMAN
14	100	1463	0.0683527	Q99590	SCAFB_HUMAN
14	53	221	0.239819	Q01130	SRSF2_HUMAN
14	108	1360	0.0794118	Q9UKE5	TNIK_HUMAN
14	60	282	0.212766	Q13595	TRA2A_HUMAN
14	40	212	0.188679	Q2TAM9	TUSC1_HUMAN
14	102	1978	0.0515672	Q14966	ZN638_HUMAN
14	59	452	0.130531	Q499Z4	ZN672_HUMAN
14	42	412	0.101942	O75541	ZN821_HUMAN
14	67	1059	0.0632672	P0CJ78	ZN865_HUMAN
14	49	330	0.148485	O95218	ZRAB2_HUMAN
13	150	1341	0.111857	Q9UKV3	ACINU_HUMAN
13	74	726	0.101928	Q9H8Y5	ANKZ1_HUMAN
13	64	550	0.116364	Q96A19	C102A_HUMAN
13	176	2339	0.0752458	Q00975	CAC1B_HUMAN
13	95	758	0.12533	Q8WUQ7	CATIN_HUMAN
13	79	623	0.126806	Q8N715	CC185_HUMAN
13	74	783	0.0945083	Q9UQ88	CD11A_HUMAN
13	93	1211	0.076796	A4D2P6	GRD2I_HUMAN
13	60	478	0.125523	Q9NZM5	GSCR2_HUMAN
13	105	1257	0.0835322	O14654	IRS4_HUMAN
13	74	432	0.171296	O95232	LC7L3_HUMAN
13	47	463	0.101512	Q8ND56	LS14A_HUMAN
13	68	496	0.137097	P0DJD3	RBY1A_HUMAN
13	68	496	0.137097	A6NDE4	RBY1B_HUMAN
13	68	496	0.137097	P0DJD4	RBY1C_HUMAN
13	68	496	0.137097	P0C7P1	RBY1D_HUMAN
13	68	496	0.137097	A6NEQ0	RBY1E_HUMAN
13	66	496	0.133065	Q15415	RBY1F_HUMAN
13	66	392	0.168367	O75526	RMXL2_HUMAN
13	92	437	0.210526	P08621	RU17_HUMAN
13	103	953	0.10808	Q14151	SAFB2_HUMAN
13	69	344	0.200581	Q13247	SRSF6_HUMAN
13	206	2968	0.069407	O15417	TNC18_HUMAN
13	105	1336	0.0785928	Q9C0J8	WDR33_HUMAN
13	129	1918	0.0672576	Q9P2E3	ZNFX1_HUMAN
12	113	2168	0.0521218	Q9UIF8	BAZ2B_HUMAN
12	98	1249	0.0784628	Q9P1Y5	CAMP3_HUMAN
12	58	520	0.111538	Q96S94	CCNL2_HUMAN
12	50	287	0.174216	Q8IVE0	CROL2_HUMAN
12	50	503	0.0994036	Q86X51	CX067_HUMAN
12	69	860	0.0802326	Q58WW2	DCAF6_HUMAN
12	211	2871	0.0734936	P15924	DESP_HUMAN
12	94	1117	0.084154	Q13574	DGKZ_HUMAN
12	185	2033	0.0909985	Q92817	EVPL_HUMAN
12	150	1894	0.0791975	Q4ZHG4	FNDC1_HUMAN
12	72	716	0.100559	Q4VC44	FWCH1_HUMAN
12	82	681	0.120411	Q99501	GA2L1_HUMAN
12	59	536	0.110075	D6RB28	GG6LR_HUMAN
12	36	463	0.0777538	P61978	HNRPK_HUMAN
12	75	719	0.104312	Q96ED9	HOOK2_HUMAN
12	96	1721	0.0557815	Q15811	ITSN1_HUMAN
12	58	665	0.087218	Q14807	KIF22_HUMAN
12	138	1343	0.102755	Q2M1P5	KIF7_HUMAN
12	104	1332	0.0780781	Q8N4C8	MINK1_HUMAN
12	63	691	0.0911722	Q8TDR0	MIPT3_HUMAN
12	162	2804	0.0577746	Q6KC79	NIPBL_HUMAN
12	98	2003	0.0489266	Q99466	NOTC4_HUMAN
12	65	613	0.106036	Q6NYC8	PPR18_HUMAN
12	75	624	0.120192	Q9NVW2	RNF12_HUMAN
12	146	1996	0.0731463	Q8TF72	SHRM3_HUMAN
12	59	396	0.14899	Q8TAD8	SNIP1_HUMAN
12	210	2390	0.0878661	O15020	SPTN2_HUMAN
12	47	261	0.180077	Q8WXF0	SRS12_HUMAN
12	201	3258	0.0616943	Q8N2C7	UNC80_HUMAN
12	77	604	0.127483	A8MXQ7	YH010_HUMAN
11	185	2320	0.0797414	Q9NSI6	BRWD1_HUMAN
11	136	2223	0.0611786	Q9P0X4	CAC1I_HUMAN
11	206	3014	0.0683477	Q9NYQ6	CELR1_HUMAN
11	99	1031	0.0960233	Q7L014	DDX46_HUMAN
11	97	1041	0.0931796	O60231	DHX16_HUMAN
11	119	1419	0.0838619	Q86US8	EST1A_HUMAN
11	50	409	0.122249	Q2M3D2	EX3L2_HUMAN
11	85	1164	0.0730241	Q9Y613	FHOD1_HUMAN
11	61	550	0.110909	H0YKK7	GG6LS_HUMAN
11	226	2649	0.0853152	Q9BYK8	HELZ2_HUMAN
11	77	924	0.0833333	Q9UMF0	ICAM5_HUMAN
11	54	546	0.0989011	Q86SU0	ILDR1_HUMAN
11	80	988	0.0809717	Q8N9B5	JMY_HUMAN
11	57	628	0.0907643	Q96JJ6	JPH4_HUMAN
11	229	3969	0.0576972	Q03164	KMT2A_HUMAN
11	250	4911	0.0509061	Q8NEZ4	KMT2C_HUMAN
11	253	5537	0.0456926	O14686	KMT2D_HUMAN
11	102	1288	0.0791925	O95382	M3K6_HUMAN
11	60	732	0.0819672	Q96T17	MA7D2_HUMAN
11	49	401	0.122195	Q96A59	MALD3_HUMAN
11	50	538	0.0929368	Q8TC71	MIEAP_HUMAN
11	116	1848	0.0627706	Q9ULV0	MYO5B_HUMAN
11	87	982	0.0885947	O60237	MYPT2_HUMAN
11	82	734	0.111717	P28698	MZF1_HUMAN
11	68	675	0.100741	Q0ZGT2	NEXN_HUMAN
11	71	640	0.110937	Q6NSJ2	PHLB3_HUMAN
11	176	2521	0.0698136	Q92508	PIEZ1_HUMAN
11	44	279	0.157706	Q9H7J1	PPR3E_HUMAN
11	49	312	0.157051	Q8NAV1	PR38A_HUMAN
11	84	963	0.0872274	Q5U651	RAIN_HUMAN
11	51	439	0.116173	Q86U06	RBM23_HUMAN
11	58	530	0.109434	Q14498	RBM39_HUMAN
11	57	483	0.118012	Q9BZI7	REN3B_HUMAN
11	33	204	0.161765	P61313	RL15_HUMAN
11	59	290	0.203448	Q9BUV0	RSRP1_HUMAN
11	40	306	0.130719	Q9GZW5	SCND2_HUMAN
11	38	336	0.113095	Q8NFV5	SPDE1_HUMAN
11	102	597	0.170854	A6NNA2	SRRM3_HUMAN
11	125	1132	0.110424	O14746	TERT_HUMAN
11	57	479	0.118998	Q15695	U2AFL_HUMAN
11	69	809	0.0852905	Q8TF30	WHAMM_HUMAN
11	118	2446	0.048242	P31629	ZEP2_HUMAN
11	74	939	0.0788072	Q9UPR6	ZFR2_HUMAN
10	113	1298	0.087057	Q9C0C7	AMRA1_HUMAN
10	99	1232	0.0803571	Q9HCE9	ANO8_HUMAN
10	107	1039	0.102984	Q76KP1	B4GN4_HUMAN
10	122	1905	0.064042	Q9UIF9	BAZ2A_HUMAN
10	59	369	0.159892	Q8NCU7	C2C4A_HUMAN
10	165	2313	0.0713359	Q15878	CAC1E_HUMAN
10	151	2377	0.0635255	O43497	CAC1G_HUMAN
10	96	1602	0.0599251	Q5T5Y3	CAMP1_HUMAN
10	106	1032	0.102713	Q9BWT7	CAR10_HUMAN
10	48	571	0.084063	Q9NUG4	CCM2L_HUMAN
10	100	1490	0.0671141	Q9NYV4	CDK12_HUMAN
10	263	3312	0.0794082	Q9NYQ7	CELR3_HUMAN
10	41	242	0.169421	Q8N319	CF223_HUMAN
10	80	711	0.112518	O94850	DEND_HUMAN
10	103	1179	0.0873622	Q6ZRV2	FA83H_HUMAN
10	32	390	0.0820513	O60667	FAIM3_HUMAN
10	39	528	0.0738636	Q9H3P7	GCP60_HUMAN
10	107	1217	0.0879211	Q14687	GSE1_HUMAN
10	62	671	0.0923994	Q7Z4V5	HDGR2_HUMAN
10	162	2610	0.062069	Q9ULT8	HECD1_HUMAN
10	63	556	0.113309	Q9BW71	HIRP3_HUMAN
10	98	1599	0.0612883	Q04637	IF4G1_HUMAN
10	122	1478	0.082544	Q5JU85	IQEC2_HUMAN
10	234	5005	0.0467532	Q2LD37	K1109_HUMAN
10	105	1233	0.0851582	Q6ZU35	K1211_HUMAN
10	98	1103	0.0888486	O43896	KIF1C_HUMAN
10	278	3695	0.0752368	O15230	LAMA5_HUMAN
10	122	1435	0.0850174	Q6F5E8	LR16C_HUMAN
10	108	1821	0.0593081	Q14767	LTBP2_HUMAN
10	66	371	0.177898	Q9NQ29	LUC7L_HUMAN
10	135	1798	0.0750834	Q6P0Q8	MAST2_HUMAN
10	153	1941	0.0788253	A7E2Y1	MYH7B_HUMAN
10	147	2215	0.0663657	Q13402	MYO7A_HUMAN
10	88	1043	0.084372	O60391	NMD3B_HUMAN
10	51	570	0.0894737	Q9BZ23	PANK2_HUMAN
10	77	717	0.107392	Q9H307	PININ_HUMAN
10	106	1416	0.0748588	O75038	PLCH2_HUMAN
10	112	1664	0.0673077	Q5VV67	PPRC1_HUMAN
10	164	2229	0.0735756	Q5JSZ5	PRC2B_HUMAN
10	59	476	0.12395	Q9H1J1	REN3A_HUMAN
10	147	1857	0.0791599	O95153	RIMB1_HUMAN
10	58	334	0.173653	Q96IZ7	RSRC1_HUMAN
10	29	309	0.0938511	Q96CW6	S7A6O_HUMAN
10	32	739	0.0433018	Q8N196	SIX5_HUMAN
10	107	1590	0.0672956	P51531	SMCA2_HUMAN
10	50	402	0.124378	P0CI01	SPDE6_HUMAN
10	62	484	0.128099	Q05519	SRS11_HUMAN
10	309	5147	0.060035	A2VEC9	SSPO_HUMAN
10	63	498	0.126506	Q9BT92	TCHP_HUMAN
10	177	2925	0.0605128	O15050	TRNK1_HUMAN
10	97	1324	0.0732628	Q9H9J4	UBP42_HUMAN
10	91	727	0.125172	Q96MU7	YTDC1_HUMAN
10	105	505	0.207921	A8MUU9	YV023_HUMAN
10	56	1074	0.0521415	Q96KR1	ZFR_HUMAN
10	118	1748	0.0675057	Q07157	ZO1_HUMAN
9	72	985	0.0730964	Q9NRA8	4ET_HUMAN
9	68	1025	0.0663415	Q8N961	ABTB2_HUMAN
9	104	1603	0.0648784	Q5TGY3	AHDC1_HUMAN
9	93	1173	0.0792839	Q6ZSZ5	ARHGI_HUMAN
9	43	453	0.0949227	Q96NS5	ASB16_HUMAN
9	72	1251	0.057554	O43520	AT8B1_HUMAN
9	57	508	0.112205	A1A5D9	BICR2_HUMAN
9	88	1001	0.0879121	O75150	BRE1B_HUMAN
9	146	1802	0.0810211	Q6RI45	BRWD3_HUMAN
9	46	370	0.124324	Q9NZU7	CABP1_HUMAN
9	41	536	0.0764925	Q96M34	CC030_HUMAN
9	58	439	0.132118	P0CW27	CC166_HUMAN
9	77	782	0.0984655	Q8TD31	CCHCR_HUMAN
9	25	132	0.189394	Q8N726	CD2A2_HUMAN
9	48	371	0.12938	Q9BWT1	CDCA7_HUMAN
9	64	551	0.116152	Q9UL16	CFA45_HUMAN
9	128	1828	0.0700219	O14647	CHD2_HUMAN
9	68	916	0.0742358	Q8IWX8	CHERP_HUMAN
9	52	341	0.152493	Q8NET6	CHSTD_HUMAN
9	118	1156	0.102076	Q8IUL8	CILP2_HUMAN
9	120	1197	0.100251	Q9P2M7	CING_HUMAN
9	50	551	0.0907441	Q16630	CPSF6_HUMAN
9	83	908	0.0914097	Q9HCG8	CWC22_HUMAN
9	98	1220	0.0803279	Q14562	DHX8_HUMAN
9	50	399	0.125313	Q8N4Y2	EFC4A_HUMAN
9	76	1016	0.0748031	Q9Y6C2	EMIL1_HUMAN
9	45	329	0.136778	Q6ZT52	FA43B_HUMAN
9	58	594	0.0976431	Q6UN15	FIP1_HUMAN
9	46	701	0.0656205	Q9UF56	FXL17_HUMAN
9	73	782	0.0933504	Q96JK4	HIPL1_HUMAN
9	113	1556	0.0726221	Q9ULG1	INO80_HUMAN
9	72	1083	0.066482	Q9ULD8	KCNH3_HUMAN
9	121	1826	0.0662651	Q9NQT8	KI13B_HUMAN
9	54	779	0.0693196	Q96PV6	LENG8_HUMAN
9	65	649	0.100154	Q86X29	LSR_HUMAN
9	63	669	0.0941704	Q9BRK4	LZTS2_HUMAN
9	79	847	0.0932704	Q16584	M3K11_HUMAN
9	115	1309	0.0878533	O60307	MAST3_HUMAN
9	29	208	0.139423	Q8NHZ7	MB3L2_HUMAN
9	29	208	0.139423	A6NE82	MB3L3_HUMAN
9	29	208	0.139423	A6NDZ8	MB3L4_HUMAN
9	28	208	0.134615	A6NJ08	MB3L5_HUMAN
9	154	2828	0.0544554	Q9NR99	MXRA5_HUMAN
9	140	2346	0.059676	Q5VU43	MYOME_HUMAN
9	56	544	0.102941	O15049	N4BP3_HUMAN
9	75	850	0.0882353	O14511	NRG2_HUMAN
9	68	841	0.0808561	Q6ZVC0	NYAP1_HUMAN
9	72	736	0.0978261	Q8IVL6	P3H3_HUMAN
9	62	917	0.0676118	Q9Y5B6	PAXB1_HUMAN
9	106	2039	0.0519863	Q92576	PHF3_HUMAN
9	76	942	0.0806794	Q16512	PKN1_HUMAN
9	68	789	0.086185	Q8N3E9	PLCD3_HUMAN
9	92	1015	0.0906404	E7EW31	PROB1_HUMAN
9	75	1170	0.0641026	Q96EV2	RBM33_HUMAN
9	70	567	0.123457	Q9BWE0	REPI1_HUMAN
9	51	547	0.0932358	Q6ZRI8	RHG36_HUMAN
9	27	263	0.102662	Q2MKA7	RSPO1_HUMAN
9	39	479	0.0814196	Q9NQZ2	SAS10_HUMAN
9	96	1366	0.0702782	Q9Y2G9	SBNO2_HUMAN
9	128	1312	0.097561	Q9H7N4	SFR19_HUMAN
9	67	951	0.0704522	Q12872	SFSWA_HUMAN
9	31	270	0.114815	Q14493	SLBP_HUMAN
9	79	993	0.0795569	P38935	SMBP2_HUMAN
9	107	1647	0.0649666	P51532	SMCA4_HUMAN
9	109	1423	0.0765987	O94964	SOGA1_HUMAN
9	149	2472	0.0602751	Q13813	SPTN1_HUMAN
9	80	1029	0.0777454	O15042	SR140_HUMAN
9	53	361	0.146814	O75683	SURF6_HUMAN
9	53	621	0.0853462	A6NKL6	T200C_HUMAN
9	107	1235	0.0866397	Q9UL54	TAOK2_HUMAN
9	63	808	0.0779703	Q4KMP7	TB10B_HUMAN
9	299	4289	0.0697132	P22105	TENX_HUMAN
9	32	257	0.124514	Q86V81	THOC4_HUMAN
9	71	482	0.147303	Q15696	U2AFM_HUMAN
9	193	2799	0.0689532	O95071	UBR5_HUMAN
9	36	297	0.121212	Q04323	UBXN1_HUMAN
9	100	1066	0.0938086	Q8WVS4	WDR60_HUMAN
9	99	1092	0.0906593	Q9ULE0	WWC3_HUMAN
9	80	1004	0.0796813	A6NFI3	ZN316_HUMAN
9	84	1163	0.072227	Q92618	ZN516_HUMAN
8	145	2346	0.0618073	Q13085	ACACA_HUMAN
8	74	1158	0.0639033	Q8IUX7	AEBP1_HUMAN
8	67	626	0.107029	P84996	ALEX_HUMAN
8	75	779	0.0962773	Q9Y2J4	AMOL2_HUMAN
8	94	1146	0.0820244	Q8TF21	ANR24_HUMAN
8	99	1705	0.0580645	Q8N1W1	ARG28_HUMAN
8	53	273	0.194139	Q9NWB6	ARGL1_HUMAN
8	184	2969	0.0619737	Q9NR48	ASH1L_HUMAN
8	84	1541	0.0545101	Q8IXJ9	ASXL1_HUMAN
8	116	1458	0.079561	Q9ULI0	ATD2B_HUMAN
8	55	364	0.151099	A6NLJ0	C2C4B_HUMAN
8	73	951	0.0767613	Q6P1N0	C2D1A_HUMAN
8	152	1468	0.103542	Q5SNV9	CA167_HUMAN
8	72	886	0.0812641	Q8NDL9	CBPC5_HUMAN
8	67	538	0.124535	Q9H0W5	CCDC8_HUMAN
8	46	561	0.0819964	Q96BT3	CENPT_HUMAN
8	64	459	0.139434	D6REC4	CFA99_HUMAN
8	165	2581	0.0639287	Q9HCK8	CHD8_HUMAN
8	38	248	0.153226	Q9Y3Y2	CHTOP_HUMAN
8	92	1184	0.0777027	O75339	CILP1_HUMAN
8	25	165	0.151515	P59089	CU086_HUMAN
8	55	660	0.0833333	O15523	DDX3Y_HUMAN
8	105	1496	0.0701872	O75064	DEN4B_HUMAN
8	96	1194	0.080402	Q7L2E3	DHX30_HUMAN
8	153	2047	0.0747435	Q96HP0	DOCK6_HUMAN
8	93	1158	0.0803109	Q5VZP5	DUS27_HUMAN
8	37	733	0.0504775	Q9HCM4	E41L5_HUMAN
8	68	598	0.113712	Q9HA90	EFCC1_HUMAN
8	38	398	0.0954774	Q6NSI3	FA53A_HUMAN
8	41	288	0.142361	P09038	FGF2_HUMAN
8	145	2391	0.0606441	Q5D862	FILA2_HUMAN
8	141	3013	0.0467972	O94915	FRYL_HUMAN
8	47	479	0.0981211	A6NI86	GG6LA_HUMAN
8	53	413	0.128329	Q5JVS0	HABP4_HUMAN
8	255	4834	0.0527513	O95714	HERC2_HUMAN
8	49	633	0.0774092	O43390	HNRPR_HUMAN
8	60	686	0.0874636	Q96MM6	HS12B_HUMAN
8	83	1697	0.0489098	Q9NZM3	ITSN2_HUMAN
8	39	400	0.0975	Q9UPV7	K1045_HUMAN
8	121	1637	0.0739157	O75037	KI21B_HUMAN
8	196	3256	0.0601966	P46013	KI67_HUMAN
8	88	838	0.105012	Q96AC6	KIFC2_HUMAN
8	33	370	0.0891892	Q86VI4	LAP4B_HUMAN
8	27	402	0.0671642	Q9H2C1	LHX5_HUMAN
8	61	683	0.0893119	O75427	LRCH4_HUMAN
8	35	606	0.0577558	Q9UNF1	MAGD2_HUMAN
8	129	2803	0.0460221	P78559	MAP1A_HUMAN
8	72	1137	0.0633245	O15068	MCF2L_HUMAN
8	183	2845	0.0643234	Q7Z7M0	MEGF8_HUMAN
8	31	248	0.125	Q15773	MLF2_HUMAN
8	115	1711	0.0672122	Q9Y5S2	MRCKB_HUMAN
8	73	719	0.10153	A6NGR9	MROH6_HUMAN
8	172	2440	0.0704918	O75376	NCOR1_HUMAN
8	95	1050	0.0904762	Q92617	NPIB3_HUMAN
8	103	1138	0.0905097	C9JG80	NPIB4_HUMAN
8	102	1133	0.0900265	A8MRT5	NPIB5_HUMAN
8	102	1138	0.0896309	A6NJU9	NPIL5_HUMAN
8	25	237	0.105485	P54845	NRL_HUMAN
8	66	1249	0.0528423	Q96HA1	P121A_HUMAN
8	74	889	0.0832396	Q6P5Z2	PKN3_HUMAN
8	93	1234	0.0753647	Q01970	PLCB3_HUMAN
8	98	1278	0.0766823	O95428	PPN_HUMAN
8	63	585	0.107692	Q9BWN1	PRR14_HUMAN
8	36	382	0.0942408	Q9NXS2	QPCTL_HUMAN
8	105	1011	0.103858	Q86YV0	RASL3_HUMAN
8	63	815	0.0773006	P52756	RBM5_HUMAN
8	60	784	0.0765306	Q9H1K0	RBNS5_HUMAN
8	73	855	0.0853801	Q96CC6	RHDF1_HUMAN
8	35	433	0.0808314	Q9BY78	RNF26_HUMAN
8	72	1286	0.0559876	Q96KN7	RPGR1_HUMAN
8	294	5038	0.0583565	P21817	RYR1_HUMAN
8	51	538	0.0947955	Q6SPF0	SAMD1_HUMAN
8	31	441	0.0702948	Q9BX95	SGPP1_HUMAN
8	52	728	0.0714286	P12755	SKI_HUMAN
8	41	531	0.0772128	Q92925	SMRD2_HUMAN
8	110	1469	0.0748809	Q5SXM2	SNPC4_HUMAN
8	49	402	0.121891	Q495Y8	SPDE2_HUMAN
8	55	549	0.100182	A6NKU9	SPDE3_HUMAN
8	49	402	0.121891	A6NHP3	SPE2B_HUMAN
8	157	2364	0.0664129	Q01082	SPTB2_HUMAN
8	79	1055	0.0748815	Q9C0H9	SRCN1_HUMAN
8	86	870	0.0988506	Q96GP6	SREC2_HUMAN
8	79	876	0.0901826	Q9BXP5	SRRT_HUMAN
8	43	248	0.173387	Q07955	SRSF1_HUMAN
8	158	2699	0.0585402	Q9P273	TEN3_HUMAN
8	164	2769	0.0592272	Q6N022	TEN4_HUMAN
8	33	253	0.130435	P0C1Z6	TFPT_HUMAN
8	36	360	0.1	Q66K66	TM198_HUMAN
8	33	298	0.110738	P45379	TNNT2_HUMAN
8	55	638	0.0862069	Q96LD4	TRI47_HUMAN
8	55	693	0.0793651	Q9H2G4	TSYL2_HUMAN
8	39	1087	0.0358786	Q14157	UBP2L_HUMAN
8	52	890	0.058427	O76024	WFS1_HUMAN
8	93	1243	0.074819	Q96J92	WNK4_HUMAN
8	32	234	0.136752	Q96IU2	ZBED3_HUMAN
8	90	919	0.0979325	O95049	ZO3_HUMAN
7	46	462	0.0995671	P18825	ADA2C_HUMAN
7	74	1251	0.0591527	P40145	ADCY8_HUMAN
7	196	3911	0.0501151	Q99996	AKAP9_HUMAN
7	44	380	0.115789	C9JTQ0	ANR63_HUMAN
7	46	501	0.0918164	Q8NCL9	APCDL_HUMAN
7	113	1544	0.0731865	Q8WWN8	ARAP3_HUMAN
7	30	220	0.136364	Q5T4W7	ARTN_HUMAN
7	102	1074	0.0949721	Q6UY14	ATL4_HUMAN
7	69	862	0.0800464	O15169	AXIN1_HUMAN
7	178	2608	0.0682515	Q9P281	BAHC1_HUMAN
7	121	1556	0.0777635	Q9NRL2	BAZ1A_HUMAN
7	37	261	0.141762	Q96PG8	BBC3B_HUMAN
7	92	1214	0.0757825	P55201	BRPF1_HUMAN
7	61	778	0.0784062	Q8TDC3	BRSK1_HUMAN
7	148	1589	0.0931403	Q9Y4F5	C170B_HUMAN
7	69	663	0.104072	Q3KP66	CA106_HUMAN
7	29	237	0.122363	Q6ZS94	CA229_HUMAN
7	127	2161	0.0587691	Q01668	CAC1D_HUMAN
7	49	499	0.0981964	Q8IYK2	CC105_HUMAN
7	37	308	0.12013	A6NFT4	CC42B_HUMAN
7	57	627	0.0909091	O60826	CCD22_HUMAN
7	54	900	0.06	Q9C0I3	CCSE1_HUMAN
7	93	1227	0.0757946	Q8IWY9	CDAN1_HUMAN
7	62	802	0.0773067	Q99459	CDC5L_HUMAN
7	59	546	0.108059	Q9H211	CDT1_HUMAN
7	138	2000	0.069	Q12873	CHD3_HUMAN
7	155	2715	0.0570902	Q8TD26	CHD6_HUMAN
7	76	772	0.0984456	Q9P2E5	CHPF2_HUMAN
7	49	295	0.166102	Q5T8R8	CI066_HUMAN
7	50	435	0.114943	Q7Z7L8	CK096_HUMAN
7	58	534	0.108614	Q6ZUT6	CO052_HUMAN
7	101	1736	0.0581797	P13942	COBA2_HUMAN
7	20	217	0.0921659	Q99807	COQ7_HUMAN
7	24	153	0.156863	Q9BQM9	CT144_HUMAN
7	154	2517	0.0611839	Q8IWT3	CUL9_HUMAN
7	43	454	0.0947137	O43293	DAPK3_HUMAN
7	64	621	0.10306	Q96MC4	DDC8_HUMAN
7	60	737	0.0814111	Q9BQ39	DDX50_HUMAN
7	85	979	0.0868233	O95886	DLGP3_HUMAN
7	261	4753	0.0549127	Q96M86	DNHD1_HUMAN
7	70	853	0.0820633	Q9UBC3	DNM3B_HUMAN
7	289	4646	0.062204	Q14204	DYHC1_HUMAN
7	114	1523	0.0748523	Q8N3D4	EH1L1_HUMAN
7	36	354	0.101695	Q4G0M1	ERFE_HUMAN
7	45	656	0.0685976	Q01844	EWS_HUMAN
7	23	369	0.0623306	P50502	F10A1_HUMAN
7	32	271	0.118081	Q8TAY7	F110D_HUMAN
7	31	256	0.121094	Q5T036	F120S_HUMAN
7	62	647	0.0958269	Q96MY7	F161B_HUMAN
7	65	791	0.0821745	Q5JRC9	FA47A_HUMAN
7	81	1223	0.0662306	Q6ZS17	FA65A_HUMAN
7	74	946	0.0782241	Q96MK2	FA65C_HUMAN
7	56	549	0.102004	Q14296	FASTK_HUMAN
7	86	1045	0.0822967	Q9HCM7	FBSL_HUMAN
7	45	555	0.0810811	Q7Z6M2	FBX33_HUMAN
7	31	170	0.182353	Q9HCT0	FGF22_HUMAN
7	85	1143	0.0743657	Q9C0D6	FHDC1_HUMAN
7	124	1810	0.0685083	Q5JV73	FRPD3_HUMAN
7	80	880	0.0909091	Q8NHY3	GA2L2_HUMAN
7	92	1478	0.0622463	Q14C86	GAPD1_HUMAN
7	113	1819	0.062122	Q96RT7	GCP6_HUMAN
7	37	250	0.148	Q5U4N7	GDF5O_HUMAN
7	38	432	0.087963	A6NEM1	GG6L9_HUMAN
7	38	444	0.0855856	A6NFL8	GG6LT_HUMAN
7	80	1586	0.0504414	P10070	GLI2_HUMAN
7	52	607	0.0856672	P36915	GNL1_HUMAN
7	51	675	0.0755556	Q8IX06	GOR_HUMAN
7	49	516	0.0949612	O43824	GTPB6_HUMAN
7	44	255	0.172549	Q75WM6	H1FNT_HUMAN
7	64	798	0.0802005	Q8TF76	HASP_HUMAN
7	67	774	0.0865633	Q9P1Z3	HCN3_HUMAN
7	45	623	0.0722311	O60506	HNRPQ_HUMAN
7	138	2623	0.0526115	Q6WRI0	IGS10_HUMAN
7	73	1065	0.0685446	Q9Y283	INVS_HUMAN
7	70	817	0.0856793	A6NCM1	IQCAL_HUMAN
7	44	520	0.0846154	Q8NCT3	K0895_HUMAN
7	77	840	0.0916667	Q6NY19	KANK3_HUMAN
7	38	456	0.0833333	Q96RP8	KCNA7_HUMAN
7	57	989	0.057634	O95259	KCNH1_HUMAN
7	107	1643	0.0651248	O15054	KDM6B_HUMAN
7	52	597	0.0871022	Q9UJP4	KLH21_HUMAN
7	51	579	0.0880829	Q5T749	KPRP_HUMAN
7	42	525	0.08	P18627	LAG3_HUMAN
7	26	406	0.0640394	P48742	LHX1_HUMAN
7	112	1257	0.089101	O75334	LIPA2_HUMAN
7	64	664	0.0963855	P02545	LMNA_HUMAN
7	43	765	0.0562092	Q5VUJ6	LRCH2_HUMAN
7	44	439	0.100228	P55081	MFAP1_HUMAN
7	36	443	0.0812641	Q9HD23	MRS2_HUMAN
7	158	2054	0.0769231	Q92614	MY18A_HUMAN
7	120	1855	0.06469	Q9Y4I1	MYO5A_HUMAN
7	88	1294	0.0680062	Q9UM54	MYO6_HUMAN
7	174	2548	0.0682889	B2RTY4	MYO9A_HUMAN
7	108	1738	0.0621404	Q8IZF0	NALCN_HUMAN
7	21	206	0.101942	Q8WUY8	NAT14_HUMAN
7	169	2754	0.0613653	Q6ZNJ1	NBEL2_HUMAN
7	46	429	0.107226	F8W1W9	NPIB9_HUMAN
7	49	619	0.0791599	Q9UBU9	NXF1_HUMAN
7	155	1896	0.0817511	O75147	OBSL1_HUMAN
7	70	861	0.0813008	Q13415	ORC1_HUMAN
7	45	673	0.0668648	A6NDB9	PALM3_HUMAN
7	212	3298	0.0642814	Q96JQ0	PCD16_HUMAN
7	49	712	0.0688202	Q08493	PDE4C_HUMAN
7	156	1756	0.0888383	O60437	PEPL_HUMAN
7	63	911	0.0691548	Q96GW7	PGCB_HUMAN
7	52	559	0.0930233	Q96KR7	PHAR3_HUMAN
7	74	910	0.0813187	Q9HB75	PIDD1_HUMAN
7	52	643	0.0808709	Q8NG27	PJA1_HUMAN
7	44	493	0.0892495	Q504Y2	PKDCC_HUMAN
7	62	881	0.0703746	Q99959	PKP2_HUMAN
7	51	463	0.110151	Q9UL41	PNMA3_HUMAN
7	48	458	0.104803	Q8NEY8	PPHLN_HUMAN
7	101	1507	0.0670206	P57071	PRD15_HUMAN
7	90	894	0.100671	Q9NQV7	PRDM9_HUMAN
7	79	1447	0.0545957	Q13635	PTC1_HUMAN
7	31	268	0.115672	Q96D70	R3HD4_HUMAN
7	41	669	0.0612855	Q96PK6	RBM14_HUMAN
7	57	391	0.14578	P38159	RBMX_HUMAN
7	112	1208	0.0927152	O94761	RECQ4_HUMAN
7	64	777	0.0823681	O15211	RGL2_HUMAN
7	34	329	0.103343	M0QZC1	RN225_HUMAN
7	94	1230	0.0764228	O00411	RPOM_HUMAN
7	26	203	0.128079	Q92737	RSLAA_HUMAN
7	36	424	0.0849057	Q52WX2	SBK1_HUMAN
7	87	1271	0.06845	Q9UPN6	SCAF8_HUMAN
7	93	2009	0.0462917	P35498	SCN1A_HUMAN
7	96	1980	0.0484848	Q9UQD0	SCN8A_HUMAN
7	130	2213	0.0587438	Q7Z5N4	SDK1_HUMAN
7	49	589	0.0831919	Q9HC62	SENP2_HUMAN
7	60	707	0.0848656	P23246	SFPQ_HUMAN
7	87	1493	0.0582719	Q9ULL8	SHRM4_HUMAN
7	39	565	0.0690265	Q53GS9	SNUT2_HUMAN
7	29	211	0.137441	O15524	SOCS1_HUMAN
7	37	337	0.109792	A6NIY4	SPDE5_HUMAN
7	42	465	0.0903226	O60687	SRPX2_HUMAN
7	26	339	0.0766962	Q9UH36	SRR1L_HUMAN
7	162	2214	0.0731707	O95425	SVIL_HUMAN
7	75	735	0.102041	Q6ZW31	SYDE1_HUMAN
7	425	8797	0.0483119	Q8NF91	SYNE1_HUMAN
7	288	6885	0.0418301	Q8WXH0	SYNE2_HUMAN
7	23	278	0.0827338	Q9H5J8	TAF1D_HUMAN
7	75	1066	0.0703565	Q96DN5	TBC31_HUMAN
7	169	2109	0.0801328	Q12789	TF3C1_HUMAN
7	25	269	0.0929368	P45378	TNNT3_HUMAN
7	113	1378	0.0820029	Q96HA7	TONSL_HUMAN
7	168	3097	0.054246	O75962	TRIO_HUMAN
7	59	698	0.0845272	Q9BZW7	TSG10_HUMAN
7	57	673	0.0846954	Q6ZVT0	TTL10_HUMAN
7	26	381	0.0682415	F5GYI3	UBA1L_HUMAN
7	60	565	0.106195	Q9UK80	UBP21_HUMAN
7	64	688	0.0930233	Q70CQ1	UBP49_HUMAN
7	91	1363	0.0667645	P35916	VGFR3_HUMAN
7	49	758	0.0646438	P38435	VKGC_HUMAN
7	119	1749	0.0680389	Q76NI1	VKIND_HUMAN
7	90	1253	0.0718276	Q8N398	VW5B2_HUMAN
7	117	1905	0.0614173	A3KMH1	VWA8_HUMAN
7	117	2297	0.050936	Q9Y3S1	WNK2_HUMAN
7	39	324	0.12037	P67809	YBOX1_HUMAN
7	35	219	0.159817	Q96FF7	YS003_HUMAN
7	98	948	0.103376	Q8IXZ2	ZC3H3_HUMAN
7	47	570	0.0824561	Q96JP5	ZFP91_HUMAN
7	41	429	0.0955711	Q9NSD4	ZN275_HUMAN
7	62	562	0.11032	Q8NAF0	ZN579_HUMAN
7	75	904	0.0829646	Q86UK7	ZN598_HUMAN
7	41	615	0.0666667	Q96CK0	ZN653_HUMAN
7	61	537	0.113594	Q96BV0	ZN775_HUMAN
6	46	469	0.098081	Q9H3Z7	ABHGB_HUMAN
6	59	778	0.0758355	O14639	ABLM1_HUMAN
6	149	2067	0.0720851	O00468	AGRIN_HUMAN
6	141	5795	0.0243313	Q8IVF2	AHNK2_HUMAN
6	40	394	0.101523	Q6P6C2	ALKB5_HUMAN
6	36	317	0.113565	Q96BM1	ANKR9_HUMAN
6	79	1061	0.0744581	P16066	ANPRA_HUMAN
6	105	2603	0.0403381	O75179	ANR17_HUMAN
6	163	2843	0.0573338	P25054	APC_HUMAN
6	81	1088	0.0744485	Q0VD83	APOBR_HUMAN
6	100	986	0.10142	Q92974	ARHG2_HUMAN
6	77	841	0.0915577	O94989	ARHGF_HUMAN
6	115	2202	0.0522252	Q8N3C0	ASCC3_HUMAN
6	81	1300	0.0623077	O60423	AT8B3_HUMAN
6	112	1390	0.0805755	Q6PL18	ATAD2_HUMAN
6	65	1190	0.0546218	P54259	ATN1_HUMAN
6	120	1686	0.0711744	Q9UKP4	ATS7_HUMAN
6	45	329	0.136778	Q96L58	B3GT6_HUMAN
6	114	1584	0.0719697	O14514	BAI1_HUMAN
6	105	1585	0.0662461	O60241	BAI2_HUMAN
6	93	1755	0.0529915	Q6W2J9	BCOR_HUMAN
6	89	1271	0.0700236	P11274	BCR_HUMAN
6	130	3051	0.042609	Q8NFC6	BD1L1_HUMAN
6	24	189	0.126984	Q7RTS1	BHA15_HUMAN
6	64	1099	0.0582348	Q6ZN30	BNC2_HUMAN
6	25	391	0.0639386	Q00587	BORG5_HUMAN
6	27	145	0.186207	P59051	BRAS2_HUMAN
6	28	158	0.177215	Q96MR7	CA145_HUMAN
6	34	255	0.133333	P08311	CATG_HUMAN
6	63	630	0.1	Q96HB5	CC120_HUMAN
6	60	622	0.096463	Q96LX7	CCD17_HUMAN
6	42	611	0.0687398	Q494V2	CCD37_HUMAN
6	82	950	0.0863158	Q76M96	CCD80_HUMAN
6	39	598	0.0652174	Q9Y232	CDYL1_HUMAN
6	172	3117	0.0551813	Q5VT06	CE350_HUMAN
6	68	821	0.0828258	Q96GE4	CEP95_HUMAN
6	25	186	0.134409	A8K010	CF176_HUMAN
6	162	2715	0.0596685	Q8IYW2	CFA46_HUMAN
6	101	1302	0.077573	Q0VF96	CGNL1_HUMAN
6	53	495	0.107071	Q86SX3	CN080_HUMAN
6	50	1204	0.0415282	Q53SF7	COBL1_HUMAN
6	87	1140	0.0763158	Q66GS9	CP135_HUMAN
6	198	2442	0.0810811	Q9BV73	CP250_HUMAN
6	45	531	0.0847458	Q6NT55	CP4FN_HUMAN
6	43	471	0.0912951	Q8N684	CPSF7_HUMAN
6	74	848	0.0872642	Q9BZJ0	CRNL1_HUMAN
6	135	2027	0.0666009	O14578	CTRO_HUMAN
6	40	348	0.114943	Q7Z7A3	CTU1_HUMAN
6	49	425	0.115294	Q9NXE8	CWC25_HUMAN
6	85	1068	0.079588	Q86T65	DAAM2_HUMAN
6	63	1042	0.0604607	Q9Y4D2	DGLA_HUMAN
6	198	3685	0.0537313	P11532	DMD_HUMAN
6	248	4471	0.0554686	Q8IVF4	DYH10_HUMAN
6	301	7570	0.0397622	Q03001	DYST_HUMAN
6	58	686	0.0845481	Q9HCS5	E41LA_HUMAN
6	56	900	0.0622222	Q9H329	E41LB_HUMAN
6	44	699	0.0629471	O94769	ECM2_HUMAN
6	39	379	0.102902	A4GXA9	EME2_HUMAN
6	56	807	0.0693928	Q52LR7	EPC2_HUMAN
6	66	722	0.0914127	Q17RC7	EX3L4_HUMAN
6	37	295	0.125424	Q9BQ89	F110A_HUMAN
6	40	383	0.104439	C9JC47	F157A_HUMAN
6	40	387	0.103359	P0CG43	F157C_HUMAN
6	43	384	0.111979	P0CG42	F157B_HUMAN
6	70	893	0.0783875	Q8IYM0	F186B_HUMAN
6	55	668	0.0823353	P81408	F189B_HUMAN
6	57	645	0.0883721	Q8NA70	FA47B_HUMAN
6	44	478	0.0920502	Q2M2I3	FA83E_HUMAN
6	54	363	0.14876	P0C7T7	FMAS1_HUMAN
6	139	1794	0.0774805	A9Z1Z3	FR1L4_HUMAN
6	37	526	0.0703422	P35637	FUS_HUMAN
6	76	694	0.10951	Q6PCT2	FXL19_HUMAN
6	45	398	0.113065	Q9H3Q3	G3ST2_HUMAN
6	66	1106	0.0596745	P08151	GLI1_HUMAN
6	47	693	0.0678211	Q9NYA3	GOG6A_HUMAN
6	48	693	0.0692641	A6NDN3	GOG6B_HUMAN
6	48	693	0.0692641	A6NDK9	GOG6C_HUMAN
6	47	693	0.0678211	P0CG33	GOG6D_HUMAN
6	63	963	0.0654206	Q7Z7M1	GP144_HUMAN
6	16	115	0.13913	P0C5Y9	H2AB1_HUMAN
6	16	115	0.13913	P0C5Z0	H2AB2_HUMAN
6	63	861	0.0731707	Q5T447	HECD3_HUMAN
6	33	286	0.115385	Q96MH2	HEXI2_HUMAN
6	297	5065	0.0586377	Q8NDA2	HMCN2_HUMAN
6	76	1136	0.0669014	Q92619	HMHA1_HUMAN
6	44	458	0.0960699	O43464	HTRA2_HUMAN
6	42	362	0.116022	O75698	HUG1_HUMAN
6	241	4374	0.0550983	Q7Z6Z7	HUWE1_HUMAN
6	27	179	0.150838	K9M1U5	IFNL4_HUMAN
6	105	1631	0.0643777	Q86VI3	IQGA3_HUMAN
6	105	1359	0.0772627	Q9P266	JCAD_HUMAN
6	72	844	0.0853081	Q5VZ66	JKIP3_HUMAN
6	143	1806	0.0791805	Q9BY89	K1671_HUMAN
6	118	1622	0.0727497	A6NE52	K1875_HUMAN
6	96	1180	0.0813559	Q0VF49	K2012_HUMAN
6	57	466	0.122318	Q9UJ96	KCNG2_HUMAN
6	32	424	0.0754717	Q15842	KCNJ8_HUMAN
6	46	430	0.106977	Q9HB15	KCNKC_HUMAN
6	64	932	0.0686695	Q9NR82	KCNQ5_HUMAN
6	46	545	0.0844037	Q8TDN2	KCNV2_HUMAN
6	104	1336	0.0778443	Q8NHM5	KDM2B_HUMAN
6	101	1805	0.0559557	Q9H1H9	KI13A_HUMAN
6	52	706	0.0736544	O00139	KIF2A_HUMAN
6	53	594	0.0892256	Q96G42	KLD7B_HUMAN
6	55	583	0.0943396	Q6PF15	KLH35_HUMAN
6	97	1372	0.0706997	Q8ND23	LR16B_HUMAN
6	66	812	0.0812808	Q15345	LRC41_HUMAN
6	65	770	0.0844156	O75074	LRP3_HUMAN
6	49	360	0.136111	P83369	LSM11_HUMAN
6	27	280	0.0964286	P12980	LYL1_HUMAN
6	78	954	0.081761	Q02779	M3K10_HUMAN
6	97	1512	0.0641534	Q13233	M3K1_HUMAN
6	61	876	0.0696347	Q8IWC1	MA7D3_HUMAN
6	24	300	0.08	Q9BXY0	MAK16_HUMAN
6	63	753	0.0836653	P27448	MARK3_HUMAN
6	51	847	0.0602125	P43243	MATR3_HUMAN
6	59	1003	0.0588235	Q96DN6	MBD6_HUMAN
6	70	718	0.097493	Q9Y6D9	MD1L1_HUMAN
6	91	1013	0.0898322	Q96AX9	MIB2_HUMAN
6	66	679	0.0972018	Q8IVT2	MISP_HUMAN
6	138	1551	0.0889749	Q6DT37	MRCKG_HUMAN
6	86	1360	0.0632353	P52701	MSH6_HUMAN
6	160	1905	0.0839895	Q9Y4B5	MTCL1_HUMAN
6	57	551	0.103448	Q96NY9	MUS81_HUMAN
6	89	1098	0.0810565	O00160	MYO1F_HUMAN
6	96	1018	0.0943026	B0I1T2	MYO1G_HUMAN
6	100	1742	0.0574053	Q9NQX4	MYO5C_HUMAN
6	39	534	0.0730337	Q8N159	NAGS_HUMAN
6	22	286	0.0769231	Q93015	NAT6_HUMAN
6	99	1562	0.0633803	Q96JN8	NEUL4_HUMAN
6	103	1336	0.0770958	O15399	NMDE4_HUMAN
6	98	1161	0.08441	E5RHQ5	NPB11_HUMAN
6	45	443	0.10158	A6NHN6	NPB15_HUMAN
6	44	425	0.103529	E9PJ23	NPIB6_HUMAN
6	43	385	0.111688	Q9NXX6	NSE4A_HUMAN
6	27	312	0.0865385	P78549	NTH_HUMAN
6	49	878	0.0558087	Q8IVF1	NTM2A_HUMAN
6	47	878	0.0535308	A6NNL0	NTM2B_HUMAN
6	44	806	0.0545906	Q5VT03	NTM2D_HUMAN
6	47	878	0.0535308	B1AL46	NTM2E_HUMAN
6	157	2115	0.0742317	Q14980	NUMA1_HUMAN
6	91	1288	0.0706522	O14841	OPLA_HUMAN
6	57	1229	0.0463792	A8CG34	P121C_HUMAN
6	26	387	0.0671835	O75781	PALM_HUMAN
6	74	1025	0.0721951	Q53GL7	PAR10_HUMAN
6	66	976	0.067623	Q86W56	PARG_HUMAN
6	41	534	0.076779	P15863	PAX1_HUMAN
6	206	5065	0.0406713	Q9Y6V0	PCLO_HUMAN
6	129	2034	0.0634218	Q9H6A9	PCX3_HUMAN
6	105	1588	0.0661209	Q9GZU2	PEG3_HUMAN
6	77	1290	0.0596899	O15534	PER1_HUMAN
6	39	326	0.119632	O60683	PEX10_HUMAN
6	133	1821	0.0730368	Q8WWQ0	PHIP_HUMAN
6	59	880	0.0670455	Q8WYR1	PI3R5_HUMAN
6	65	641	0.101404	Q9H611	PIF1_HUMAN
6	278	4303	0.0646061	P98161	PKD1_HUMAN
6	77	968	0.0795455	Q13563	PKD2_HUMAN
6	83	1386	0.0598846	Q9H7P9	PKHG2_HUMAN
6	75	797	0.0941029	Q9Y446	PKP3_HUMAN
6	82	1265	0.0648221	P16885	PLCG2_HUMAN
6	108	1366	0.079063	Q8IY17	PLPL6_HUMAN
6	131	2135	0.0613583	O43157	PLXB1_HUMAN
6	84	782	0.107417	Q9BZL4	PP12C_HUMAN
6	36	567	0.0634921	Q96T49	PP16B_HUMAN
6	28	217	0.129032	Q6ZNR8	PRR17_HUMAN
6	106	1479	0.07167	Q92626	PXDN_HUMAN
6	33	308	0.107143	P55042	RAD_HUMAN
6	31	298	0.104027	O75628	REM1_HUMAN
6	100	1221	0.0819001	Q8N1G1	REXO1_HUMAN
6	15	97	0.154639	P61927	RL37_HUMAN
6	31	305	0.101639	Q5T653	RM02_HUMAN
6	92	1314	0.0700152	Q5XPI4	RN123_HUMAN
6	22	326	0.0674847	Q9BV68	RN126_HUMAN
6	48	420	0.114286	Q9H2S5	RNF39_HUMAN
6	98	1386	0.0707071	Q96MS0	ROBO3_HUMAN
6	52	461	0.112798	P56182	RRP1_HUMAN
6	89	1441	0.0617627	Q96T23	RSF1_HUMAN
6	55	560	0.0982143	Q86UC2	RSPH3_HUMAN
6	21	128	0.164062	O60783	RT14_HUMAN
6	256	4967	0.0515402	Q92736	RYR2_HUMAN
6	49	646	0.0758514	Q6PCB7	S27A1_HUMAN
6	89	1400	0.0635714	Q9BY12	SCAPE_HUMAN
6	84	2005	0.0418953	Q99250	SCN2A_HUMAN
6	57	1112	0.051259	Q9GZR1	SENP6_HUMAN
6	120	1707	0.0702988	O15047	SET1A_HUMAN
6	58	576	0.100694	Q9BRG2	SH23A_HUMAN
6	46	725	0.0634483	Q9BZQ2	SHP1L_HUMAN
6	71	852	0.0833333	Q2M3G4	SHRM1_HUMAN
6	47	538	0.0873606	A6NL88	SHSA7_HUMAN
6	106	1722	0.0615563	Q9P2F8	SI1L2_HUMAN
6	47	783	0.0600255	P57059	SIK1_HUMAN
6	48	400	0.12	Q9NRC8	SIR7_HUMAN
6	47	896	0.0524554	Q14940	SL9A5_HUMAN
6	32	373	0.0857909	Q969T3	SNX21_HUMAN
6	71	1168	0.0607877	Q8WY21	SORC1_HUMAN
6	49	1047	0.0468004	Q9Y5B9	SP16H_HUMAN
6	65	756	0.0859788	Q08AE8	SPIR1_HUMAN
6	291	4700	0.0619149	Q9P2P6	STAR9_HUMAN
6	70	968	0.072314	O94804	STK10_HUMAN
6	29	235	0.123404	Q1ZZU3	SWI5_HUMAN
6	75	1001	0.0749251	Q7L7X3	TAOK1_HUMAN
6	81	1298	0.0624037	O60343	TBCD4_HUMAN
6	108	1960	0.055102	Q9UGU0	TCF20_HUMAN
6	50	651	0.0768049	Q9H7E2	TDRD3_HUMAN
6	93	1409	0.0660043	Q63HR2	TENC1_HUMAN
6	46	654	0.0703364	Q03169	TNAP2_HUMAN
6	27	325	0.0830769	Q96KP6	TNIP3_HUMAN
6	54	583	0.0926244	Q5JTV8	TOIP1_HUMAN
6	61	711	0.0857947	Q4KMQ1	TPRN_HUMAN
6	58	630	0.0920635	Q8WV44	TRI41_HUMAN
6	113	1321	0.0855413	Q5TCY1	TTBK1_HUMAN
6	47	582	0.080756	A2A3L6	TTC24_HUMAN
6	48	566	0.0848057	A8MYJ7	TTC34_HUMAN
6	53	542	0.097786	O00294	TULP1_HUMAN
6	40	246	0.162602	Q16560	U1SBP_HUMAN
6	112	1684	0.0665083	Q70EL1	UBP54_HUMAN
6	40	508	0.0787402	Q92575	UBXN4_HUMAN
6	36	389	0.092545	Q9UKP6	UR2R_HUMAN
6	40	341	0.117302	Q5T230	UTF1_HUMAN
6	36	478	0.0753138	P04004	VTNC_HUMAN
6	47	417	0.11271	Q9GZT5	WN10A_HUMAN
6	43	430	0.1	A6NIX2	WTIP_HUMAN
6	83	1192	0.0696309	Q6AWC2	WWC2_HUMAN
6	44	641	0.0686427	Q5GH73	XKR6_HUMAN
6	34	340	0.1	A6NL46	YF016_HUMAN
6	39	215	0.181395	Q8NDZ9	YJ017_HUMAN
6	56	553	0.101266	O75467	Z324A_HUMAN
6	60	1483	0.0404585	Q6AHZ1	Z518A_HUMAN
6	43	747	0.0575636	Q9UFB7	ZBT47_HUMAN
6	39	456	0.0855263	Q53FD0	ZC21C_HUMAN
6	53	648	0.0817901	O95125	ZN202_HUMAN
6	73	1342	0.0543964	Q9H4Z2	ZN335_HUMAN
6	47	567	0.0828924	Q96ME7	ZN512_HUMAN
6	45	670	0.0671642	Q8TF50	ZN526_HUMAN
6	73	896	0.0814732	Q6ZN55	ZN574_HUMAN
6	33	276	0.119565	P0C7X2	ZN688_HUMAN
6	42	659	0.0637329	P0CG23	ZN853_HUMAN
5	41	393	0.104326	Q7L8J4	3BP5L_HUMAN
5	46	468	0.0982906	Q6UXT9	ABH15_HUMAN
5	145	2458	0.058991	O00763	ACACB_HUMAN
5	61	740	0.0824324	Q15027	ACAP1_HUMAN
5	37	450	0.0822222	P08913	ADA2A_HUMAN
5	52	692	0.0751445	O43823	AKAP8_HUMAN
5	51	494	0.103239	A6NCL7	AN33B_HUMAN
5	56	1153	0.048569	O14617	AP3D1_HUMAN
5	35	279	0.125448	Q96LR9	APLD1_HUMAN
5	87	1485	0.0585859	O60306	AQR_HUMAN
5	108	1450	0.0744828	Q96P48	ARAP1_HUMAN
5	75	912	0.0822368	Q92888	ARHG1_HUMAN
5	37	290	0.127586	Q8N7S6	ARI2O_HUMAN
5	78	935	0.0834225	Q96C12	ARMC5_HUMAN
5	36	607	0.0593081	Q9H9F9	ARP5_HUMAN
5	92	962	0.0956341	O00192	ARVC_HUMAN
5	34	466	0.0729614	Q6ZVZ8	ASB18_HUMAN
5	23	505	0.0455446	P15336	ATF2_HUMAN
5	27	494	0.0546559	P17544	ATF7_HUMAN
5	82	1232	0.0665584	P48751	B3A3_HUMAN
5	37	393	0.0941476	O60512	B4GT3_HUMAN
5	68	780	0.0871795	Q8TBE0	BAHD1_HUMAN
5	80	1522	0.0525624	O60242	BAI3_HUMAN
5	32	235	0.13617	Q7RTU4	BHA09_HUMAN
5	63	746	0.0844504	Q14137	BOP1_HUMAN
5	90	1058	0.0850662	O95696	BRD1_HUMAN
5	79	975	0.0810256	Q5VTR2	BRE1A_HUMAN
5	62	761	0.0814717	O60477	BRNP1_HUMAN
5	48	766	0.0626632	Q76B58	BRNP3_HUMAN
5	47	736	0.0638587	Q8IWQ3	BRSK2_HUMAN
5	44	353	0.124646	B7Z1M9	C2D4D_HUMAN
5	82	1982	0.0413724	Q9UKL3	C8AP2_HUMAN
5	172	3354	0.0512821	Q9H251	CAD23_HUMAN
5	78	1086	0.0718232	O75808	CAN15_HUMAN
5	96	1154	0.0831889	Q9BXL7	CAR11_HUMAN
5	80	1004	0.0796813	Q9BXL6	CAR14_HUMAN
5	67	1380	0.0485507	O75976	CBPD_HUMAN
5	23	210	0.109524	Q494R4	CC153_HUMAN
5	64	674	0.0949555	A6NI56	CC154_HUMAN
5	42	235	0.178723	Q8N9Z2	CC71L_HUMAN
5	24	202	0.118812	Q15834	CC85B_HUMAN
5	19	254	0.0748031	Q9GZT6	CC90B_HUMAN
5	82	1150	0.0713043	Q8IX12	CCAR1_HUMAN
5	44	467	0.0942184	Q8IV32	CCD71_HUMAN
5	38	360	0.105556	Q9H6F5	CCD86_HUMAN
5	33	362	0.0911602	P46092	CCR10_HUMAN
5	94	1094	0.0859232	Q6ZU80	CE128_HUMAN
5	22	130	0.169231	Q9H8W2	CF155_HUMAN
5	178	2997	0.0593927	Q9P2D1	CHD7_HUMAN
5	70	775	0.0903226	Q8IZ52	CHSS2_HUMAN
5	64	486	0.131687	Q9NS84	CHST7_HUMAN
5	32	561	0.057041	Q7LFX5	CHSTF_HUMAN
5	29	203	0.142857	Q8N9P6	CI163_HUMAN
5	14	155	0.0903226	Q5VZT2	CJ113_HUMAN
5	68	1019	0.0667321	P12110	CO6A2_HUMAN
5	45	612	0.0735294	Q96MW5	COG8_HUMAN
5	30	540	0.0555556	Q86Y22	CONA1_HUMAN
5	27	265	0.101887	Q9Y3A0	COQ4_HUMAN
5	56	620	0.0903226	Q53F19	CQ085_HUMAN
5	22	164	0.134146	A8MU93	CQ100_HUMAN
5	26	508	0.0511811	Q02930	CREB5_HUMAN
5	35	693	0.0505051	Q53ET0	CRTC2_HUMAN
5	15	186	0.0806452	I3L1E1	CS084_HUMAN
5	24	136	0.176471	Q5T4H9	CSC10_HUMAN
5	40	589	0.0679117	Q96S65	CSRN1_HUMAN
5	40	563	0.071048	Q8WYA6	CTBL1_HUMAN
5	19	201	0.0945274	Q16619	CTF1_HUMAN
5	115	1698	0.0677267	Q14999	CUL7_HUMAN
5	84	1505	0.055814	P39880	CUX1_HUMAN
5	15	148	0.101351	Q8WYQ4	CV015_HUMAN
5	65	774	0.0839793	Q5SW24	DACT2_HUMAN
5	49	740	0.0662162	O15075	DCLK1_HUMAN
5	67	950	0.0705263	Q92771	DDX12_HUMAN
5	59	729	0.0809328	Q92841	DDX17_HUMAN
5	43	783	0.054917	Q9NR30	DDX21_HUMAN
5	46	326	0.141104	Q8WXF8	DEDD2_HUMAN
5	86	1009	0.0852329	Q9ULE3	DEN2A_HUMAN
5	45	550	0.0818182	Q7L5Y6	DET1_HUMAN
5	91	1556	0.0584833	Q9Y2E4	DIP2C_HUMAN
5	58	702	0.0826211	Q6Y2X3	DJC14_HUMAN
5	26	304	0.0855263	Q9NVM6	DJC17_HUMAN
5	20	178	0.11236	Q5SXM8	DNLZ_HUMAN
5	117	1616	0.072401	P26358	DNMT1_HUMAN
5	22	172	0.127907	Q86SG4	DPCA2_HUMAN
5	128	2590	0.0494208	O75417	DPOLQ_HUMAN
5	242	4523	0.0535043	Q96DT5	DYH11_HUMAN
5	73	1231	0.0593014	Q8NDI1	EHBP1_HUMAN
5	84	1210	0.0694215	Q96KQ7	EHMT2_HUMAN
5	73	753	0.0969456	Q8IYF1	ELOA2_HUMAN
5	48	344	0.139535	B3EWF7	EP2A2_HUMAN
5	164	3159	0.0519152	Q96L91	EP400_HUMAN
5	50	607	0.0823723	Q7L775	EPMIP_HUMAN
5	51	732	0.0696721	P48449	ERG7_HUMAN
5	32	530	0.0603774	Q92731	ESR2_HUMAN
5	68	921	0.0738328	A0FGR8	ESYT2_HUMAN
5	31	734	0.0422343	Q6SJ93	F111B_HUMAN
5	50	575	0.0869565	Q9UFP1	F198A_HUMAN
5	38	538	0.070632	Q7L5A3	F214B_HUMAN
5	37	215	0.172093	Q5T7N8	F27D1_HUMAN
5	16	127	0.125984	Q5RGS3	F74A1_HUMAN
5	22	159	0.138365	A6NL05	F74A7_HUMAN
5	39	464	0.0840517	A6NIJ5	F90AK_HUMAN
5	34	431	0.0788863	Q5VUD6	FA69B_HUMAN
5	21	123	0.170732	Q5TZK3	FAM74_HUMAN
5	36	374	0.0962567	Q9NPI8	FANCF_HUMAN
5	21	166	0.126506	Q96RJ6	FER3L_HUMAN
5	106	1422	0.0745429	Q2V2M9	FHOD3_HUMAN
5	55	437	0.125858	Q86VR8	FJX1_HUMAN
5	80	1419	0.0563777	Q68DA7	FMN1_HUMAN
5	53	632	0.0838608	Q06787	FMR1_HUMAN
5	226	6907	0.0327204	Q5CZC0	FSIP2_HUMAN
5	46	416	0.110577	Q6VB85	FX4L2_HUMAN
5	46	417	0.110312	Q6VB84	FX4L3_HUMAN
5	46	416	0.110577	Q8WXT5	FX4L4_HUMAN
5	44	416	0.105769	Q5VV16	FX4L5_HUMAN
5	45	417	0.107914	Q3SYB3	FX4L6_HUMAN
5	53	805	0.0658385	Q96ME1	FXL18_HUMAN
5	53	684	0.0774854	Q8IWF2	FXRD2_HUMAN
5	27	296	0.0912162	P55040	GEM_HUMAN
5	83	1580	0.0525316	P10071	GLI3_HUMAN
5	32	526	0.0608365	Q8NEA9	GMCLL_HUMAN
5	27	245	0.110204	O95467	GNAS3_HUMAN
5	138	3259	0.0423443	Q14789	GOGB1_HUMAN
5	105	2241	0.0468541	Q3T8J9	GON4L_HUMAN
5	31	560	0.0553571	Q86SQ6	GP123_HUMAN
5	31	368	0.0842391	Q9BZJ7	GPR62_HUMAN
5	49	525	0.0933333	Q96I76	GPTC3_HUMAN
5	28	336	0.0833333	Q5TC63	GRTP1_HUMAN
5	90	1103	0.0815956	Q02846	GUC2D_HUMAN
5	29	474	0.0611814	P41235	HNF4A_HUMAN
5	27	408	0.0661765	Q14541	HNF4G_HUMAN
5	66	856	0.0771028	Q9BUJ2	HNRL1_HUMAN
5	60	747	0.0803213	Q1KMD3	HNRL2_HUMAN
5	35	492	0.0711382	Q9ULV5	HSF4_HUMAN
5	52	1220	0.042623	O60841	IF2P_HUMAN
5	28	168	0.166667	Q6U949	IG2AS_HUMAN
5	51	381	0.133858	Q9UBC1	IKBL1_HUMAN
5	25	184	0.13587	Q9NV31	IMP3_HUMAN
5	51	887	0.0574972	Q9UL03	INT6_HUMAN
5	57	695	0.0820144	Q6IPM2	IQCE_HUMAN
5	82	1338	0.0612855	Q9Y4H2	IRS2_HUMAN
5	77	1167	0.0659811	O75578	ITA10_HUMAN
5	112	2540	0.0440945	Q15652	JHD2C_HUMAN
5	34	334	0.101796	Q96S16	JMJD8_HUMAN
5	41	331	0.123867	Q96MG2	JSPR1_HUMAN
5	43	694	0.0619597	Q6ZU52	K0408_HUMAN
5	114	1618	0.0704574	O60303	K0556_HUMAN
5	109	1950	0.0558974	Q9HCM3	K1549_HUMAN
5	83	1105	0.0751131	Q7Z3B3	KANL1_HUMAN
5	39	538	0.0724907	Q8IYT4	KATL2_HUMAN
5	55	911	0.0603732	Q92953	KCNB2_HUMAN
5	79	1017	0.0776794	Q9UQ05	KCNH4_HUMAN
5	29	427	0.0679157	O15554	KCNN4_HUMAN
5	60	695	0.0863309	P56696	KCNQ4_HUMAN
5	113	1560	0.0724359	P41229	KDM5C_HUMAN
5	101	1674	0.0603345	Q7Z4S6	KI21A_HUMAN
5	155	1882	0.0823592	Q9ULI4	KI26A_HUMAN
5	29	241	0.120332	Q8N7Y1	KIAS3_HUMAN
5	68	1029	0.0660836	Q9P2E2	KIF17_HUMAN
5	93	998	0.0931864	Q2TAC6	KIF19_HUMAN
5	127	1690	0.0751479	Q12756	KIF1A_HUMAN
5	56	673	0.0832095	Q9BW19	KIFC1_HUMAN
5	71	833	0.0852341	Q9BVG8	KIFC3_HUMAN
5	41	504	0.0813492	Q6P597	KLC3_HUMAN
5	33	288	0.114583	Q9Y2Y9	KLF13_HUMAN
5	21	252	0.0833333	Q9BXK1	KLF16_HUMAN
5	43	424	0.101415	P11801	KPSH1_HUMAN
5	13	128	0.101562	C9JBD0	KRBX1_HUMAN
5	60	703	0.0853485	Q8N9T8	KRI1_HUMAN
5	71	914	0.0776805	Q659C4	LAR1B_HUMAN
5	53	756	0.0701058	O95461	LARGE_HUMAN
5	92	1308	0.0703364	Q86UK5	LBN_HUMAN
5	33	602	0.0548173	Q8N3X6	LCORL_HUMAN
5	20	221	0.0904977	Q6UYE1	LEU7_HUMAN
5	102	1202	0.0848586	Q13136	LIPA1_HUMAN
5	104	1194	0.0871022	O75145	LIPA3_HUMAN
5	136	1683	0.0808081	Q8WWI1	LMO7_HUMAN
5	95	1460	0.0650685	Q96Q04	LMTK3_HUMAN
5	24	178	0.134831	A1A4G5	LNP1_HUMAN
5	53	728	0.0728022	Q8TBB1	LNX1_HUMAN
5	64	773	0.0827943	Q17RB8	LONF1_HUMAN
5	61	754	0.0809019	Q1L5Z9	LONF2_HUMAN
5	39	292	0.133562	A6NIK2	LR10B_HUMAN
5	115	2015	0.057072	Q38SD2	LRRK1_HUMAN
5	33	385	0.0857143	Q9BX40	LS14B_HUMAN
5	138	1624	0.0849754	Q8N2S1	LTBP4_HUMAN
5	37	417	0.088729	P28300	LYOX_HUMAN
5	55	626	0.0878594	Q99759	M3K3_HUMAN
5	51	603	0.0845771	Q7Z4T9	MAAT1_HUMAN
5	379	7388	0.0512994	Q9UPN3	MACF1_HUMAN
5	28	206	0.135922	Q9BW11	MAD3_HUMAN
5	58	808	0.0717822	Q8NA82	MARHA_HUMAN
5	69	752	0.0917553	Q96L34	MARK4_HUMAN
5	118	1570	0.0751592	Q9Y2H9	MAST1_HUMAN
5	32	415	0.0771084	Q6ZN01	MASTR_HUMAN
5	69	904	0.0763274	P49736	MCM2_HUMAN
5	51	840	0.0607143	Q9UJA3	MCM8_HUMAN
5	45	878	0.0512528	Q6DN12	MCTP2_HUMAN
5	31	359	0.086351	Q96AQ8	MCUR1_HUMAN
5	35	520	0.0673077	A1L020	MEX3A_HUMAN
5	35	342	0.102339	Q9GZY8	MFF_HUMAN
5	53	816	0.064951	Q13164	MK07_HUMAN
5	52	544	0.0955882	Q8TD08	MK15_HUMAN
5	47	800	0.05875	Q9NYL2	MLTK_HUMAN
5	37	488	0.0758197	P24347	MMP11_HUMAN
5	41	390	0.105128	O75900	MMP23_HUMAN
5	31	263	0.117871	Q9BU76	MMTA2_HUMAN
5	27	183	0.147541	Q13875	MOBP_HUMAN
5	74	1003	0.0737787	Q9HCE1	MOV10_HUMAN
5	48	580	0.0827586	P30305	MPIP2_HUMAN
5	40	675	0.0592593	Q8N3R9	MPP5_HUMAN
5	84	1437	0.0584551	O15440	MRP5_HUMAN
5	38	521	0.0729367	Q8N5Y2	MS3L1_HUMAN
5	32	364	0.0879121	Q5BKX8	MURC_HUMAN
5	77	876	0.0878995	Q8N9H8	MUT7_HUMAN
5	40	442	0.0904977	Q9BRK3	MXRA8_HUMAN
5	108	1530	0.0705882	Q96JP2	MY15B_HUMAN
5	186	2567	0.0724581	Q8IUG5	MY18B_HUMAN
5	124	1972	0.0628803	P35749	MYH11_HUMAN
5	112	1946	0.057554	Q9Y2K3	MYH15_HUMAN
5	123	1960	0.0627551	P35579	MYH9_HUMAN
5	138	2116	0.0652174	Q6PIF6	MYO7B_HUMAN
5	38	399	0.0952381	Q86VE0	MYPOP_HUMAN
5	73	1030	0.0708738	O14974	MYPT1_HUMAN
5	74	1061	0.0697455	P59046	NAL12_HUMAN
5	77	892	0.0863229	P59044	NALP6_HUMAN
5	80	1330	0.0601504	Q9HCH0	NCK5L_HUMAN
5	16	356	0.0449438	Q13562	NDF1_HUMAN
5	25	337	0.074184	Q96NK8	NDF6_HUMAN
5	50	380	0.131579	P18615	NELFE_HUMAN
5	40	772	0.0518135	Q14494	NF2L1_HUMAN
5	73	1120	0.0651786	Q12986	NFX1_HUMAN
5	13	347	0.037464	P23511	NFYA_HUMAN
5	96	1610	0.0596273	Q5SYE7	NHSL1_HUMAN
5	71	697	0.101865	Q86XR2	NIBL2_HUMAN
5	44	402	0.109453	Q5M9Q1	NKAPL_HUMAN
5	29	301	0.0963455	A6NCS4	NKX26_HUMAN
5	74	1484	0.0498652	Q13224	NMDE2_HUMAN
5	82	1233	0.0665045	Q14957	NMDE3_HUMAN
5	57	641	0.0889236	Q9H6W3	NO66_HUMAN
5	46	376	0.12234	Q8NFA2	NOXO1_HUMAN
5	41	414	0.0990338	O75200	NPIB7_HUMAN
5	40	432	0.0925926	E9PQR5	NPIB8_HUMAN
5	33	434	0.0760369	O75469	NR1I2_HUMAN
5	25	281	0.088968	Q9BQI9	NRIP2_HUMAN
5	107	1582	0.0676359	Q7Z2Y5	NRK_HUMAN
5	49	530	0.0924528	Q6X4W1	NSMF_HUMAN
5	20	228	0.0877193	Q9NPB1	NT5M_HUMAN
5	112	2012	0.055666	Q92621	NU205_HUMAN
5	33	429	0.0769231	Q9Y2G5	OFUT2_HUMAN
5	57	677	0.084195	Q9NZT2	OGFR_HUMAN
5	70	842	0.0831354	Q9BZF2	OSBL7_HUMAN
5	38	596	0.0637584	Q7RTS5	OTOP3_HUMAN
5	37	377	0.0981432	P41231	P2RY2_HUMAN
5	28	306	0.0915033	Q86U42	PABP2_HUMAN
5	33	422	0.0781991	P26367	PAX6_HUMAN
5	85	1070	0.0794393	O95206	PCDH8_HUMAN
5	132	2341	0.0563862	Q96RV3	PCX1_HUMAN
5	60	485	0.123711	Q8N8D1	PDCD7_HUMAN
5	73	1447	0.0504492	Q9NTI5	PDS5B_HUMAN
5	38	432	0.087963	Q96HM7	PED1B_HUMAN
5	66	745	0.0885906	P05164	PERM_HUMAN
5	20	314	0.0636943	P78337	PITX1_HUMAN
5	20	317	0.0630915	Q99697	PITX2_HUMAN
5	17	302	0.0562914	O75364	PITX3_HUMAN
5	155	2849	0.0544051	Q8TDX9	PK1L1_HUMAN
5	131	2253	0.0581447	Q9NTG1	PKDRE_HUMAN
5	91	779	0.116816	Q9H4M7	PKHA4_HUMAN
5	89	1048	0.0849237	Q9Y2H5	PKHA6_HUMAN
5	108	1121	0.0963426	Q6IQ23	PKHA7_HUMAN
5	186	4074	0.0456554	P08F94	PKHD1_HUMAN
5	67	984	0.0680894	Q16513	PKN2_HUMAN
5	69	882	0.0782313	P29590	PML_HUMAN
5	30	299	0.100334	O95685	PPR3D_HUMAN
5	73	1023	0.0713587	Q86YN6	PRGC2_HUMAN
5	65	615	0.105691	O43900	PRIC3_HUMAN
5	23	226	0.10177	O75360	PROP1_HUMAN
5	35	413	0.0847458	Q8N3Z0	PRS35_HUMAN
5	43	435	0.0988506	Q86WR7	PRSR2_HUMAN
5	48	700	0.0685714	O75127	PTCD1_HUMAN
5	45	478	0.0941423	Q96A99	PTX4_HUMAN
5	57	803	0.0709838	C9J798	RAS4B_HUMAN
5	37	344	0.107558	Q9NS23	RASF1_HUMAN
5	26	326	0.0797546	P50749	RASF2_HUMAN
5	39	418	0.0933014	Q8WWW0	RASF5_HUMAN
5	58	803	0.0722291	O43374	RASL2_HUMAN
5	56	592	0.0945946	Q92804	RBP56_HUMAN
5	67	739	0.0906631	Q9NS39	RED2_HUMAN
5	23	303	0.0759076	Q8NC24	RELL2_HUMAN
5	74	1101	0.0672116	Q7Z6I6	RHG30_HUMAN
5	41	427	0.0960187	P36578	RL4_HUMAN
5	22	246	0.0894309	Q6DKI1	RL7L_HUMAN
5	27	248	0.108871	P18124	RL7_HUMAN
5	86	1914	0.0449321	Q13129	RLF_HUMAN
5	54	390	0.138462	Q96E39	RMXL1_HUMAN
5	63	708	0.0889831	Q8NCN4	RN169_HUMAN
5	283	5207	0.0543499	Q63HN8	RN213_HUMAN
5	31	459	0.0675381	Q96BH1	RNF25_HUMAN
5	22	221	0.0995475	Q8TA86	RP9_HUMAN
5	30	315	0.0952381	Q9UNE2	RPH3L_HUMAN
5	59	958	0.0615866	Q9Y2L1	RRP44_HUMAN
5	29	218	0.133028	P82930	RT34_HUMAN
5	48	563	0.0852575	Q9BST9	RTKN_HUMAN
5	94	1516	0.0620053	Q8N2Y8	RUSC2_HUMAN
5	79	1288	0.0613354	Q8TF17	S3TC2_HUMAN
5	105	2179	0.0481872	O15027	SC16A_HUMAN
5	77	1279	0.0602033	Q12770	SCAP_HUMAN
5	126	1630	0.0773006	Q14160	SCRIB_HUMAN
5	73	749	0.0974633	Q13214	SEM3B_HUMAN
5	71	888	0.079955	Q9H3T3	SEM6B_HUMAN
5	106	1966	0.0539166	Q9UPS6	SET1B_HUMAN
5	98	1442	0.0679612	Q9C0A6	SETD5_HUMAN
5	138	2677	0.0515502	Q7Z333	SETX_HUMAN
5	132	2161	0.0610828	Q9Y566	SHAN1_HUMAN
5	140	1731	0.0808781	Q9BYB0	SHAN3_HUMAN
5	31	328	0.0945122	Q6ZMC9	SIG15_HUMAN
5	125	1834	0.068157	Q8IY92	SLX4_HUMAN
5	50	894	0.0559284	Q5VUG0	SMBT2_HUMAN
5	15	140	0.107143	Q8TEV8	SMCR5_HUMAN
5	89	917	0.0970556	P53814	SMTN_HUMAN
5	35	339	0.103245	Q6IEG0	SNR48_HUMAN
5	21	328	0.0640244	Q5JUK2	SOLH1_HUMAN
5	30	315	0.0952381	O15370	SOX12_HUMAN
5	34	384	0.0885417	P35713	SOX18_HUMAN
5	60	879	0.0682594	P23497	SP100_HUMAN
5	59	753	0.0783533	Q9BVQ7	SPA5L_HUMAN
5	68	847	0.0802834	Q8IY81	SPB1_HUMAN
5	58	685	0.0846715	Q68D10	SPT2_HUMAN
5	84	1100	0.0763636	O94875	SRBS2_HUMAN
5	48	473	0.10148	Q9NQ55	SSF1_HUMAN
5	35	585	0.0598291	Q9NRC1	ST7_HUMAN
5	51	534	0.0955056	Q8TDR2	STK35_HUMAN
5	74	1194	0.0619765	Q5VT97	SYDE2_HUMAN
5	42	523	0.0803059	Q5JPH6	SYEM_HUMAN
5	76	855	0.0888889	Q9HCS7	SYF1_HUMAN
5	104	1343	0.0774386	Q96PV0	SYGP1_HUMAN
5	46	518	0.0888031	Q9NP81	SYSM_HUMAN
5	74	1063	0.0696143	Q5ST30	SYVM_HUMAN
5	42	468	0.0897436	Q8N4L1	T151A_HUMAN
5	32	376	0.0851064	Q8IXX5	T183A_HUMAN
5	43	307	0.140065	Q69YZ2	T200B_HUMAN
5	35	443	0.0790068	O75478	TAD2A_HUMAN
5	106	1872	0.0566239	P21675	TAF1_HUMAN
5	123	1990	0.061809	Q9HCD6	TANC2_HUMAN
5	38	446	0.0852018	Q8IV04	TB10C_HUMAN
5	59	775	0.076129	O60347	TBC12_HUMAN
5	49	615	0.0796748	A7MCY6	TBKB1_HUMAN
5	27	157	0.171975	Q15170	TCAL1_HUMAN
5	25	199	0.125628	Q12870	TCF15_HUMAN
5	145	2725	0.053211	Q9UKZ4	TEN1_HUMAN
5	41	542	0.0756458	Q15554	TERF2_HUMAN
5	28	208	0.134615	Q8WUY1	THEM6_HUMAN
5	87	1208	0.0720199	Q9UNS1	TIM_HUMAN
5	37	467	0.0792291	Q9GZM7	TINAL_HUMAN
5	27	284	0.0950704	O43763	TLX2_HUMAN
5	36	459	0.0784314	Q96AN5	TM143_HUMAN
5	61	906	0.0673289	Q8TDI7	TMC2_HUMAN
5	57	805	0.0708075	Q7Z403	TMC6_HUMAN
5	31	493	0.0628803	Q96DC7	TMCO6_HUMAN
5	52	1094	0.047532	Q9C0B7	TNG6_HUMAN
5	49	429	0.114219	Q8NFZ5	TNIP2_HUMAN
5	59	601	0.0981697	Q969P6	TOP1M_HUMAN
5	53	423	0.125296	Q9NXH8	TOR4A_HUMAN
5	141	2363	0.0596699	P12270	TPR_HUMAN
5	64	755	0.0847682	Q9BRZ2	TRI56_HUMAN
5	45	486	0.0925926	Q8NG06	TRI58_HUMAN
5	30	643	0.0466563	Q86VQ6	TRXR3_HUMAN
5	75	1244	0.0602894	Q6IQ55	TTBK2_HUMAN
5	71	815	0.0871166	A6NNM8	TTL13_HUMAN
5	30	1119	0.0268097	Q5T6F2	UBAP2_HUMAN
5	87	1123	0.0774711	Q70EL4	UBP43_HUMAN
5	115	2635	0.0436433	Q9P2D8	UNC79_HUMAN
5	68	709	0.0959097	Q2YD98	UVSSA_HUMAN
5	60	867	0.0692042	Q86VR7	VS10L_HUMAN
5	27	281	0.0960854	O43709	WBS22_HUMAN
5	172	2873	0.0598677	Q6ZQQ6	WDR87_HUMAN
5	66	907	0.0727674	Q9P202	WHRN_HUMAN
5	73	940	0.0776596	Q01831	XPC_HUMAN
5	72	950	0.0757895	Q9H0D6	XRN2_HUMAN
5	44	792	0.0555556	Q6P2D8	XRRA1_HUMAN
5	41	372	0.110215	P16989	YBOX3_HUMAN
5	22	135	0.162963	Q9H8V8	YD018_HUMAN
5	29	311	0.0932476	A8MV72	YH009_HUMAN
5	24	164	0.146341	A8MZ25	YQ037_HUMAN
5	28	382	0.0732984	I3L1I5	YS060_HUMAN
5	28	495	0.0565657	Q8NAP8	ZBT8B_HUMAN
5	70	1013	0.0691017	Q9P1Z0	ZBTB4_HUMAN
5	116	1989	0.0583208	O60293	ZC3H1_HUMAN
5	48	485	0.0989691	Q8WTX9	ZDHC1_HUMAN
5	129	3703	0.0348366	Q15911	ZFHX3_HUMAN
5	149	2539	0.0586845	Q68DK2	ZFY26_HUMAN
5	75	1370	0.0547445	Q14202	ZMYM3_HUMAN
5	111	1687	0.0657973	P52746	ZN142_HUMAN
5	40	459	0.087146	O14771	ZN213_HUMAN
5	27	264	0.102273	Q96C55	ZN524_HUMAN
5	34	456	0.0745614	Q9HAH1	ZN556_HUMAN
5	43	317	0.135647	Q7L3S4	ZN771_HUMAN
5	78	782	0.0997442	Q8N393	ZN786_HUMAN
5	47	651	0.0721966	Q0VGE8	ZN816_HUMAN
5	27	372	0.0725806	Q96NB3	ZN830_HUMAN
5	66	1079	0.0611677	Q5FWF4	ZRAB3_HUMAN
5	70	1215	0.0576132	Q9HCJ5	ZSWM6_HUMAN
4	30	298	0.100671	P29372	3MG_HUMAN
4	20	366	0.0546448	P30939	5HT1F_HUMAN
4	48	610	0.0786885	Q96P26	5NT1B_HUMAN
4	58	802	0.0723192	Q8IZ83	A16A1_HUMAN
4	58	619	0.0936995	Q8NAA4	A16L2_HUMAN
4	94	1704	0.0551643	Q99758	ABCA3_HUMAN
4	150	2146	0.0698975	Q8IZY2	ABCA7_HUMAN
4	56	738	0.0758808	Q9NRK6	ABCBA_HUMAN
4	40	673	0.0594354	Q9H221	ABCG8_HUMAN
4	31	501	0.0618762	P11230	ACHB_HUMAN
4	45	572	0.0786713	P25100	ADA1D_HUMAN
4	38	658	0.0577508	O00116	ADAS_HUMAN
4	43	544	0.0790441	Q96D53	ADCK4_HUMAN
4	88	1192	0.0738255	Q99490	AGAP2_HUMAN
4	37	903	0.0409745	Q92667	AKAP1_HUMAN
4	17	210	0.0809524	Q9NQ31	AKIP1_HUMAN
4	22	199	0.110553	Q9NWT8	AKIP_HUMAN
4	127	2813	0.0451475	Q12802	AKP13_HUMAN
4	24	518	0.046332	O94788	AL1A2_HUMAN
4	46	643	0.0715397	Q9UKV5	AMFR_HUMAN
4	67	879	0.076223	Q01433	AMPD2_HUMAN
4	61	992	0.0614919	Q8IVF6	AN18A_HUMAN
4	47	496	0.0947581	Q69YU3	AN34A_HUMAN
4	49	743	0.0659489	P54802	ANAG_HUMAN
4	177	4377	0.0404387	Q12955	ANK3_HUMAN
4	53	941	0.0563231	Q9P2S6	ANKY1_HUMAN
4	65	955	0.0680628	Q32M45	ANO4_HUMAN
4	23	264	0.0871212	Q9H560	ANR19_HUMAN
4	61	917	0.0665213	A6NC57	ANR62_HUMAN
4	27	460	0.0586957	Q92481	AP2B_HUMAN
4	25	450	0.0555556	Q92754	AP2C_HUMAN
4	27	452	0.0597345	Q7Z6R9	AP2D_HUMAN
4	54	421	0.128266	Q66PJ3	AR6P4_HUMAN
4	77	1704	0.0451878	Q8WZ64	ARAP2_HUMAN
4	122	1519	0.080316	Q8TER5	ARH40_HUMAN
4	56	596	0.0939597	Q7Z628	ARHG8_HUMAN
4	99	1522	0.065046	O15085	ARHGB_HUMAN
4	48	789	0.0608365	P27540	ARNT_HUMAN
4	35	390	0.0897436	Q5U4P2	ASPH1_HUMAN
4	45	481	0.0935551	Q6ZMM2	ATL5_HUMAN
4	128	2492	0.0513644	P46100	ATRX_HUMAN
4	99	1259	0.0786338	Q8WXX7	AUTS2_HUMAN
4	87	1241	0.0701048	P04920	B3A2_HUMAN
4	58	983	0.0590031	Q96Q91	B3A4_HUMAN
4	31	378	0.0820106	Q9C0J1	B3GN4_HUMAN
4	35	384	0.0911458	Q6ZMB0	B3GN6_HUMAN
4	84	998	0.0841683	Q6L9W6	B4GN3_HUMAN
4	34	345	0.0985507	Q99933	BAG1_HUMAN
4	104	1483	0.0701281	Q9UIG0	BAZ1B_HUMAN
4	22	193	0.11399	Q9BXH1	BBC3_HUMAN
4	42	628	0.066879	P50895	BCAM_HUMAN
4	83	1711	0.0485096	Q5H9F3	BCORL_HUMAN
4	159	2624	0.0605945	A6H8Y1	BDP1_HUMAN
4	39	799	0.048811	Q8NDZ0	BEND2_HUMAN
4	32	392	0.0816327	O95972	BMP15_HUMAN
4	33	454	0.0726872	P22003	BMP5_HUMAN
4	39	402	0.0970149	Q7Z5Y6	BMP8A_HUMAN
4	38	402	0.0945274	P34820	BMP8B_HUMAN
4	55	994	0.055332	Q01954	BNC1_HUMAN
4	62	1362	0.0455213	O60885	BRD4_HUMAN
4	55	783	0.0702427	Q9C0B6	BRNP2_HUMAN
4	90	1205	0.0746888	Q9ULD4	BRPF3_HUMAN
4	22	253	0.0869565	Q8N1D0	BWR1B_HUMAN
4	41	503	0.0815109	P15538	C11B1_HUMAN
4	25	329	0.0759878	Q9BXJ3	C1QT4_HUMAN
4	26	252	0.103175	P60827	C1QT8_HUMAN
4	119	1620	0.0734568	Q9P2K1	C2D2A_HUMAN
4	23	226	0.10177	F2Z333	CA233_HUMAN
4	122	2221	0.0549302	Q13936	CAC1C_HUMAN
4	117	1977	0.0591806	O60840	CAC1F_HUMAN
4	49	788	0.0621827	Q9Y6N8	CAD10_HUMAN
4	39	794	0.0491184	P55289	CAD12_HUMAN
4	66	956	0.0690377	Q13111	CAF1A_HUMAN
4	21	296	0.0709459	P49069	CAMLG_HUMAN
4	59	719	0.0820584	Q6ZSI9	CAN12_HUMAN
4	16	166	0.0963855	Q2NKX9	CB068_HUMAN
4	36	289	0.124567	Q6PK04	CC137_HUMAN
4	43	553	0.0777577	Q96PX6	CC85A_HUMAN
4	24	483	0.0496894	Q96A33	CCD47_HUMAN
4	56	652	0.0858896	Q6ZN84	CCD81_HUMAN
4	24	281	0.0854093	A8MXV6	CD15L_HUMAN
4	45	454	0.0991189	Q96GN5	CDA7L_HUMAN
4	25	378	0.0661376	Q16543	CDC37_HUMAN
4	20	164	0.121951	P38936	CDN1A_HUMAN
4	95	1460	0.0650685	Q9UPV0	CE164_HUMAN
4	23	281	0.0818505	Q15744	CEBPE_HUMAN
4	21	140	0.15	P49450	CENPA_HUMAN
4	32	205	0.156098	Q5T6M2	CF122_HUMAN
4	20	121	0.165289	Q8N9K7	CH079_HUMAN
4	115	1710	0.0672515	O14646	CHD1_HUMAN
4	170	2897	0.0586814	Q3L8U1	CHD9_HUMAN
4	47	530	0.0886792	Q9Y4C5	CHST2_HUMAN
4	50	424	0.117925	Q9H2A9	CHST8_HUMAN
4	48	431	0.111369	Q5SZB4	CI050_HUMAN
4	32	320	0.1	Q6ZQR2	CI171_HUMAN
4	48	601	0.0798669	Q15642	CIP4_HUMAN
4	68	1247	0.0545309	Q8N655	CJ012_HUMAN
4	20	123	0.162602	Q6IPW1	CK071_HUMAN
4	18	115	0.156522	A6NJI1	CK086_HUMAN
4	73	1046	0.0697897	Q9UDT6	CLIP2_HUMAN
4	44	484	0.0909091	P49759	CLK1_HUMAN
4	49	481	0.101871	Q9HAZ1	CLK4_HUMAN
4	78	1673	0.0466228	Q9Y6Y1	CMTA1_HUMAN
4	23	148	0.155405	Q8NCQ2	CNAS1_HUMAN
4	81	903	0.089701	Q8N137	CNTRB_HUMAN
4	47	980	0.0479592	Q8WTW3	COG1_HUMAN
4	61	925	0.0659459	P57737	CORO7_HUMAN
4	23	276	0.0833333	Q9Y6N1	COX11_HUMAN
4	49	508	0.0964567	O15528	CP27B_HUMAN
4	90	1443	0.0623701	Q10570	CPSF1_HUMAN
4	26	416	0.0625	Q6JBY9	CPZIP_HUMAN
4	12	120	0.1	O60519	CRBL2_HUMAN
4	23	290	0.0793103	Q8IUH2	CREG2_HUMAN
4	21	174	0.12069	P07320	CRGD_HUMAN
4	36	473	0.0761099	Q6ZS72	CS035_HUMAN
4	27	291	0.0927835	Q9NUL5	CS066_HUMAN
4	74	1217	0.0608053	Q2NKJ3	CTC1_HUMAN
4	73	968	0.0754132	O60716	CTND1_HUMAN
4	72	711	0.101266	A2AJT9	CX023_HUMAN
4	16	322	0.0496894	Q7LFL8	CXXC5_HUMAN
4	62	907	0.0683572	A8MPP1	D11L8_HUMAN
4	35	521	0.0671785	Q8N465	D2HDH_HUMAN
4	59	855	0.0690058	Q86Y56	DAAF5_HUMAN
4	63	1078	0.0584416	Q9Y4D1	DAAM1_HUMAN
4	90	1189	0.0756939	Q5VWQ8	DAB2P_HUMAN
4	56	836	0.0669856	Q9NYF0	DACT1_HUMAN
4	31	430	0.072093	Q9UJU6	DBNL_HUMAN
4	35	631	0.0554675	P0C7V8	DC8L2_HUMAN
4	69	970	0.071134	Q96FC9	DDX11_HUMAN
4	54	540	0.1	Q9NUL7	DDX28_HUMAN
4	55	662	0.0830816	O00571	DDX3X_HUMAN
4	58	666	0.0870871	Q8N8A6	DDX51_HUMAN
4	51	614	0.0830619	P17844	DDX5_HUMAN
4	34	318	0.106918	O75618	DEDD_HUMAN
4	59	1198	0.0492487	A2RUS2	DEND3_HUMAN
4	94	1143	0.0822397	Q14147	DHX34_HUMAN
4	62	779	0.0795892	Q8IX18	DHX40_HUMAN
4	58	1101	0.0526794	O60879	DIAP2_HUMAN
4	89	1401	0.0635261	A7MBM2	DISP2_HUMAN
4	135	1919	0.0703491	Q8TDM6	DLG5_HUMAN
4	40	561	0.0713012	Q9Y5R5	DMRT2_HUMAN
4	38	504	0.0753968	Q5VZB9	DMRTA_HUMAN
4	31	542	0.0571956	Q96SC8	DMTA2_HUMAN
4	92	1830	0.0502732	Q92608	DOCK2_HUMAN
4	37	649	0.0570108	Q16643	DREB_HUMAN
4	40	424	0.0943396	P0CJ85	DU4L2_HUMAN
4	40	424	0.0943396	P0CJ86	DU4L3_HUMAN
4	40	422	0.0947867	P0CJ87	DU4L4_HUMAN
4	40	424	0.0943396	P0CJ88	DU4L5_HUMAN
4	40	424	0.0943396	P0CJ89	DU4L6_HUMAN
4	40	424	0.0943396	P0CJ90	DU4L7_HUMAN
4	123	1551	0.0793037	Q9NRD9	DUOX1_HUMAN
4	31	314	0.0987261	Q05923	DUS2_HUMAN
4	29	394	0.0736041	Q13115	DUS4_HUMAN
4	44	625	0.0704	Q13202	DUS8_HUMAN
4	39	374	0.104278	Q6RFH8	DUX4C_HUMAN
4	40	424	0.0943396	Q9UBX2	DUX4_HUMAN
4	26	508	0.0511811	Q96F86	EDC3_HUMAN
4	22	178	0.123596	P20800	EDN2_HUMAN
4	72	1503	0.0479042	A4FU69	EFCB5_HUMAN
4	46	589	0.0780985	Q05215	EGR4_HUMAN
4	72	1298	0.05547	Q9H9B1	EHMT1_HUMAN
4	42	548	0.0766423	O15371	EIF3D_HUMAN
4	24	267	0.0898876	P08246	ELNE_HUMAN
4	59	896	0.0658482	Q32P44	EMAL3_HUMAN
4	37	570	0.0649123	Q96AY2	EME1_HUMAN
4	39	346	0.112717	Q9H0I2	ENKD1_HUMAN
4	50	836	0.0598086	Q9H2F5	EPC1_HUMAN
4	89	1530	0.0581699	Q5RHP9	ERIC3_HUMAN
4	38	904	0.0420354	Q7Z2K6	ERMP1_HUMAN
4	63	926	0.0680346	Q76MJ5	ERN2_HUMAN
4	35	595	0.0588235	P03372	ESR1_HUMAN
4	42	452	0.0929204	P41212	ETV6_HUMAN
4	64	794	0.0806045	Q96CN4	EVI5L_HUMAN
4	50	725	0.0689655	Q8IYI6	EXOC8_HUMAN
4	52	746	0.0697051	Q15910	EZH2_HUMAN
4	72	972	0.0740741	Q8N612	F16A2_HUMAN
4	105	2430	0.0432099	Q5VWN6	F208B_HUMAN
4	22	125	0.176	Q5SNX5	F27E2_HUMAN
4	23	113	0.20354	Q08E93	F27E3_HUMAN
4	22	126	0.174603	Q5T7N7	F27E1_HUMAN
4	41	463	0.0885529	Q658T7	F90A2_HUMAN
4	25	213	0.117371	Q8NDB6	FA156_HUMAN
4	39	325	0.12	Q9Y247	FA50B_HUMAN
4	34	392	0.0867347	Q9NYF3	FA53C_HUMAN
4	44	594	0.0740741	Q8IYT1	FA71A_HUMAN
4	218	4981	0.0437663	Q6V0I7	FAT4_HUMAN
4	38	461	0.0824295	Q8N539	FBCD1_HUMAN
4	96	1133	0.0847308	Q8TES7	FBF1_HUMAN
4	39	491	0.0794297	Q9UJT9	FBXL7_HUMAN
4	69	961	0.0718002	P98174	FGD1_HUMAN
4	32	239	0.133891	P11487	FGF3_HUMAN
4	125	2386	0.0523889	P02751	FINC_HUMAN
4	49	881	0.0556186	Q0VG06	FP100_HUMAN
4	29	279	0.103943	Q92837	FRAT1_HUMAN
4	24	233	0.103004	O75474	FRAT2_HUMAN
4	52	549	0.0947177	Q8N878	FRMD1_HUMAN
4	40	508	0.0787402	Q8WU20	FRS2_HUMAN
4	25	365	0.0684932	P19526	FUT1_HUMAN
4	39	342	0.114035	Q11130	FUT7_HUMAN
4	33	300	0.11	Q9H469	FXL15_HUMAN
4	54	621	0.0869565	P51114	FXR1_HUMAN
4	33	496	0.0665323	Q9UM11	FZR_HUMAN
4	42	482	0.0871369	Q9UN86	G3BP2_HUMAN
4	47	431	0.109049	Q96A11	G3ST3_HUMAN
4	28	222	0.126126	Q8TAE8	G45IP_HUMAN
4	31	392	0.0790816	P51570	GALK1_HUMAN
4	25	217	0.115207	Q9NY12	GAR1_HUMAN
4	37	478	0.0774059	O95995	GAS8_HUMAN
4	35	308	0.113636	Q99988	GDF15_HUMAN
4	40	372	0.107527	P27539	GDF1_HUMAN
4	42	455	0.0923077	Q6KF10	GDF6_HUMAN
4	47	432	0.108796	P14136	GFAP_HUMAN
4	59	650	0.0907692	Q8N9W4	GG6L2_HUMAN
4	60	750	0.08	A8MZA4	GG6L6_HUMAN
4	47	652	0.0720859	Q86UU5	GGN_HUMAN
4	22	300	0.0733333	Q8IVV7	GID4_HUMAN
4	34	306	0.111111	Q8WWP7	GIMA1_HUMAN
4	40	632	0.0632911	F8WBI6	GOG8N_HUMAN
4	41	632	0.0648734	A6NCC3	GOG8O_HUMAN
4	39	631	0.0618067	I6L899	GOG8R_HUMAN
4	37	494	0.0748988	Q8IZ08	GP135_HUMAN
4	44	609	0.0722496	Q6NV75	GP153_HUMAN
4	44	814	0.0540541	Q8NFN8	GP156_HUMAN
4	155	2367	0.0654837	Q6PRD1	GP179_HUMAN
4	40	356	0.11236	O95872	GPAN1_HUMAN
4	46	738	0.0623306	Q3KR37	GRM1B_HUMAN
4	62	872	0.0711009	Q14416	GRM2_HUMAN
4	58	633	0.0916272	O94927	HAUS5_HUMAN
4	64	889	0.071991	Q9UL51	HCN2_HUMAN
4	47	1011	0.0464886	Q9UKV0	HDAC9_HUMAN
4	154	3142	0.0490134	P42858	HD_HUMAN
4	198	3996	0.0495495	Q9Y4D8	HECD4_HUMAN
4	255	4861	0.0524583	Q15751	HERC1_HUMAN
4	31	328	0.0945122	Q9NQ87	HEYL_HUMAN
4	33	420	0.0785714	O14979	HNRDL_HUMAN
4	59	1158	0.0509499	Q9BVR0	HRC23_HUMAN
4	46	223	0.206278	P13985	HRES1_HUMAN
4	27	278	0.0971223	Q8NHY5	HUS1B_HUMAN
4	59	917	0.0643402	P19367	HXK1_HUMAN
4	60	667	0.089955	Q8NFR9	I17RE_HUMAN
4	84	1585	0.0529968	O43432	IF4G3_HUMAN
4	41	559	0.0733453	Q0D2I5	IFFO1_HUMAN
4	44	506	0.0869565	Q12894	IFRD2_HUMAN
4	35	291	0.120275	Q96G21	IMP4_HUMAN
4	58	878	0.0660592	Q53TQ3	IN80D_HUMAN
4	38	422	0.0900474	Q9UK53	ING1_HUMAN
4	84	1297	0.0647648	P14616	INSRR_HUMAN
4	47	461	0.101952	P23677	IP3KA_HUMAN
4	86	1242	0.0692432	P35568	IRS1_HUMAN
4	125	1822	0.0686059	P16144	ITB4_HUMAN
4	47	823	0.0571081	Q92613	JADE3_HUMAN
4	69	810	0.0851852	Q96AA8	JKIP2_HUMAN
4	18	347	0.0518732	P17275	JUNB_HUMAN
4	122	2235	0.0545861	Q14667	K0100_HUMAN
4	67	967	0.0692865	Q2KHM9	K0753_HUMAN
4	77	936	0.082265	Q8NCU4	K1407_HUMAN
4	81	1849	0.0438075	Q6ZVL6	K154L_HUMAN
4	104	1190	0.087395	Q5VZ46	K1614_HUMAN
4	29	264	0.109848	Q96PY0	K1908_HUMAN
4	155	2985	0.0519263	O60229	KALRN_HUMAN
4	49	904	0.0542035	Q9P2N6	KANL3_HUMAN
4	105	2073	0.0506512	Q8WYB5	KAT6B_HUMAN
4	58	1236	0.0469256	Q12791	KCMA1_HUMAN
4	48	858	0.0559441	Q14721	KCNB1_HUMAN
4	44	513	0.08577	Q9UIX4	KCNG1_HUMAN
4	42	436	0.0963303	Q8TAE7	KCNG3_HUMAN
4	39	519	0.0751445	Q8TDN1	KCNG4_HUMAN
4	46	526	0.0874525	Q96KK3	KCNS1_HUMAN
4	97	1771	0.0547713	Q9ULH0	KDIS_HUMAN
4	93	1162	0.0800344	Q9Y2K7	KDM2A_HUMAN
4	98	1544	0.0634715	Q9UGL1	KDM5B_HUMAN
4	93	1539	0.0604288	Q9BY66	KDM5D_HUMAN
4	34	443	0.0767494	Q07666	KHDR1_HUMAN
4	91	1317	0.0690964	Q96L93	KI16B_HUMAN
4	63	864	0.0729167	Q86Y91	KI18B_HUMAN
4	24	178	0.134831	B2CW77	KILIN_HUMAN
4	22	362	0.0607735	Q13351	KLF1_HUMAN
4	61	772	0.0790155	O75676	KS6A4_HUMAN
4	36	491	0.0733198	O75449	KTNA1_HUMAN
4	43	655	0.0656489	Q9BVA0	KTNB1_HUMAN
4	55	837	0.0657109	Q9NVR5	KTU_HUMAN
4	160	3122	0.0512492	P24043	LAMA2_HUMAN
4	41	724	0.0566298	Q71RC2	LARP4_HUMAN
4	37	264	0.140152	Q96BZ8	LENG1_HUMAN
4	47	666	0.0705706	Q8WVC0	LEO1_HUMAN
4	26	356	0.0730337	Q68G74	LHX8_HUMAN
4	57	592	0.0962838	P0C6S8	LIGO3_HUMAN
4	72	1083	0.066482	Q9UPQ0	LIMC1_HUMAN
4	103	1185	0.0869198	O75335	LIPA4_HUMAN
4	40	526	0.0760456	Q9HAT1	LMA1L_HUMAN
4	66	670	0.0985075	Q96CN5	LRC45_HUMAN
4	50	542	0.0922509	Q8IYG6	LRC56_HUMAN
4	127	1905	0.0666667	O75096	LRP4_HUMAN
4	84	1076	0.0780669	Q86V48	LUZP1_HUMAN
4	46	701	0.0656205	O75342	LX12B_HUMAN
4	32	824	0.038835	Q9UDY8	MALT1_HUMAN
4	68	704	0.0965909	Q9H992	MARH7_HUMAN
4	60	788	0.0761421	Q7KZI7	MARK2_HUMAN
4	173	2626	0.0658797	O15021	MAST4_HUMAN
4	148	2089	0.0708473	Q14676	MDC1_HUMAN
4	295	5596	0.0527162	Q9NU22	MDN1_HUMAN
4	60	689	0.0870827	Q7L2J0	MEPCE_HUMAN
4	41	595	0.0689076	P35240	MERL_HUMAN
4	43	456	0.0942982	Q9HCE5	MET14_HUMAN
4	33	366	0.0901639	Q5JXM2	MET24_HUMAN
4	31	293	0.105802	Q9UJH8	METRN_HUMAN
4	57	1006	0.05666	Q86YT6	MIB1_HUMAN
4	24	235	0.102128	Q9BRQ6	MIC25_HUMAN
4	72	1124	0.0640569	O94851	MICA2_HUMAN
4	17	232	0.0732759	Q9H2W2	MIXL1_HUMAN
4	56	852	0.0657277	Q9NP71	MLXPL_HUMAN
4	20	298	0.0671141	Q9UH92	MLX_HUMAN
4	42	585	0.0717949	Q13368	MPP3_HUMAN
4	106	1732	0.0612009	Q5VT25	MRCKA_HUMAN
4	52	708	0.0734463	P49959	MRE11_HUMAN
4	32	420	0.0761905	Q9HC36	MRM3_HUMAN
4	68	1545	0.0440129	Q92887	MRP2_HUMAN
4	58	715	0.0811189	Q2TV78	MST1L_HUMAN
4	56	715	0.0783217	Q13330	MTA1_HUMAN
4	54	653	0.0826953	O75081	MTG16_HUMAN
4	43	466	0.0922747	Q13505	MTX1_HUMAN
4	65	893	0.0727884	Q14764	MVP_HUMAN
4	134	1976	0.0678138	P35580	MYH10_HUMAN
4	132	2058	0.0641399	Q9HD67	MYO10_HUMAN
4	76	1136	0.0669014	O43795	MYO1B_HUMAN
4	90	1063	0.084666	O00159	MYO1C_HUMAN
4	67	1006	0.0666004	O94832	MYO1D_HUMAN
4	83	1341	0.0618941	Q8WXR4	MYO3B_HUMAN
4	144	2157	0.0667594	Q13459	MYO9B_HUMAN
4	113	2061	0.0548278	Q9NZM1	MYOF_HUMAN
4	82	1465	0.0559727	P54296	MYOM2_HUMAN
4	75	1320	0.0568182	Q86TC9	MYPN_HUMAN
4	30	409	0.0733496	Q9Y303	NAGA_HUMAN
4	135	2946	0.0458248	Q8NFP9	NBEA_HUMAN
4	61	921	0.0662324	Q5TI25	NBPFE_HUMAN
4	80	1321	0.0605602	O14594	NCAN_HUMAN
4	18	99	0.181818	Q69YL0	NCAS2_HUMAN
4	32	391	0.0818414	A6NI72	NCF1B_HUMAN
4	29	366	0.079235	A8MVU1	NCF1C_HUMAN
4	32	390	0.0820513	P14598	NCF1_HUMAN
4	16	331	0.0483384	Q9HD90	NDF4_HUMAN
4	16	394	0.0406091	Q92597	NDRG1_HUMAN
4	273	6669	0.0409357	P20929	NEBU_HUMAN
4	39	445	0.0876404	P51955	NEK2_HUMAN
4	99	1621	0.0610734	P48681	NEST_HUMAN
4	50	555	0.0900901	A8MQ27	NEU1B_HUMAN
4	41	574	0.0714286	O76050	NEUL1_HUMAN
4	38	419	0.0906921	Q8NCF5	NF2IP_HUMAN
4	57	1299	0.0438799	Q6P4R8	NFRKB_HUMAN
4	75	1139	0.0658472	Q9UJF2	NGAP_HUMAN
4	26	237	0.109705	Q92886	NGN1_HUMAN
4	22	272	0.0808824	Q9H2A3	NGN2_HUMAN
4	23	214	0.107477	Q9Y4Z2	NGN3_HUMAN
4	36	337	0.106825	Q15599	NHRF2_HUMAN
4	105	1651	0.0635978	Q6T4R5	NHS_HUMAN
4	41	451	0.0909091	Q969F2	NKD2_HUMAN
4	54	634	0.0851735	Q9BZE4	NOG1_HUMAN
4	49	731	0.0670315	Q13823	NOG2_HUMAN
4	30	213	0.140845	Q9UGY1	NOL12_HUMAN
4	56	702	0.0797721	Q5SY16	NOL9_HUMAN
4	70	860	0.0813953	Q5C9Z4	NOM1_HUMAN
4	46	471	0.0976645	Q15233	NONO_HUMAN
4	59	857	0.0688448	P78316	NOP14_HUMAN
4	49	636	0.077044	Q86U38	NOP9_HUMAN
4	92	2471	0.0372319	Q04721	NOTC2_HUMAN
4	147	2321	0.0633348	Q9UM47	NOTC3_HUMAN
4	31	430	0.072093	Q9GZQ6	NPFF1_HUMAN
4	32	522	0.0613027	Q9Y5X5	NPFF2_HUMAN
4	70	1330	0.0526316	Q7Z494	NPHP3_HUMAN
4	95	1426	0.0666199	O75161	NPHP4_HUMAN
4	14	196	0.0714286	Q9HCQ7	NPVF_HUMAN
4	35	460	0.076087	P55055	NR1H2_HUMAN
4	34	447	0.0760626	Q13133	NR1H3_HUMAN
4	98	1730	0.0566474	Q86VF7	NRAP_HUMAN
4	146	2696	0.0541543	Q96L73	NSD1_HUMAN
4	87	1365	0.0637363	O96028	NSD2_HUMAN
4	78	1437	0.0542797	Q9BZ95	NSD3_HUMAN
4	62	558	0.111111	Q9H0G5	NSRP1_HUMAN
4	23	210	0.109524	P34130	NTF4_HUMAN
4	29	297	0.0976431	Q14249	NUCG_HUMAN
4	98	1564	0.0626598	Q149M9	NWD1_HUMAN
4	50	481	0.10395	Q9GZU5	NYX_HUMAN
4	26	400	0.065	P00973	OAS1_HUMAN
4	29	350	0.0828571	Q6N063	OGFD2_HUMAN
4	79	897	0.0880713	A6NNC1	P12LL_HUMAN
4	44	736	0.0597826	Q32P28	P3H1_HUMAN
4	38	680	0.0558824	Q9H3D4	P63_HUMAN
4	32	636	0.0503145	O15350	P73_HUMAN
4	47	509	0.0923379	Q9NZ20	PA2G3_HUMAN
4	29	479	0.0605428	Q9H074	PAIP1_HUMAN
4	78	1383	0.0563991	Q8WX93	PALLD_HUMAN
4	42	614	0.0684039	Q4VXU2	PAP1L_HUMAN
4	43	582	0.0738832	Q9NVV4	PAPD1_HUMAN
4	110	1356	0.0811209	Q8TEW0	PARD3_HUMAN
4	103	1555	0.0662379	O94913	PCF11_HUMAN
4	65	1141	0.0569676	Q14432	PDE3A_HUMAN
4	50	829	0.0603136	O60658	PDE8A_HUMAN
4	43	593	0.0725126	O76083	PDE9A_HUMAN
4	33	368	0.0896739	Q9Y2S7	PDIP2_HUMAN
4	161	2839	0.0567101	O15018	PDZD2_HUMAN
4	24	182	0.131868	Q13951	PEBB_HUMAN
4	50	708	0.0706215	Q86TG7	PEG10_HUMAN
4	42	555	0.0756757	P14222	PERF_HUMAN
4	90	1253	0.0718276	Q86SQ0	PHLB2_HUMAN
4	45	581	0.0774527	Q9BXM7	PINK1_HUMAN
4	87	1349	0.0644922	Q9BZ72	PITM2_HUMAN
4	98	1271	0.0771046	Q96PX9	PKH4B_HUMAN
4	79	1116	0.0707885	Q9HAU0	PKHA5_HUMAN
4	90	1219	0.073831	A1L390	PKHG3_HUMAN
4	80	1062	0.0753296	O94827	PKHG5_HUMAN
4	73	790	0.0924051	Q3KR16	PKHG6_HUMAN
4	78	793	0.0983607	Q7Z736	PKHH3_HUMAN
4	88	1290	0.0682171	P19174	PLCG1_HUMAN
4	32	440	0.0727273	A4D2B8	PM2P1_HUMAN
4	46	512	0.0898438	Q6PEZ8	PONL1_HUMAN
4	15	140	0.107143	O75817	POP7_HUMAN
4	18	147	0.122449	Q96A00	PP14A_HUMAN
4	17	154	0.11039	Q86WC6	PPR27_HUMAN
4	83	1461	0.0568104	Q9BXM0	PRAX_HUMAN
4	25	261	0.0957854	Q969G5	PRDBP_HUMAN
4	53	831	0.0637786	Q96MT3	PRIC1_HUMAN
4	69	844	0.0817536	Q7Z3G6	PRIC2_HUMAN
4	44	536	0.0820896	Q9UF12	PROD2_HUMAN
4	35	295	0.118644	Q8N4B5	PRR18_HUMAN
4	13	87	0.149425	P81277	PRRP_HUMAN
4	55	603	0.0912106	P0CW18	PRS56_HUMAN
4	61	1056	0.0577652	Q8NDX1	PSD4_HUMAN
4	52	523	0.0994264	Q8WXF1	PSPC1_HUMAN
4	39	755	0.0516556	Q96N64	PWP2A_HUMAN
4	83	1036	0.0801158	Q6ZMN7	PZRN4_HUMAN
4	51	838	0.0608592	Q04671	P_HUMAN
4	112	1663	0.0673482	Q9H0J4	QRIC2_HUMAN
4	52	1099	0.0473157	Q15032	R3HD1_HUMAN
4	66	1043	0.063279	P15918	RAG1_HUMAN
4	34	373	0.0911528	Q02833	RASF7_HUMAN
4	68	930	0.0731183	P98175	RBM10_HUMAN
4	22	266	0.0827068	Q9Y580	RBM7_HUMAN
4	36	322	0.111801	Q9Y388	RBMX2_HUMAN
4	55	557	0.0987433	Q13123	RED_HUMAN
4	156	3460	0.0450867	P78509	RELN_HUMAN
4	32	340	0.0941176	Q8IYK8	REM2_HUMAN
4	33	427	0.0772834	P51606	RENBP_HUMAN
4	108	1566	0.0689655	Q9P2R6	RERE_HUMAN
4	32	380	0.0842105	Q9UGC7	RF1ML_HUMAN
4	61	710	0.0859155	Q3MIN7	RGL3_HUMAN
4	88	2036	0.043222	Q6GYQ0	RGPA1_HUMAN
4	61	856	0.0712617	Q6PJF5	RHDF2_HUMAN
4	87	1528	0.0569372	Q96QB1	RHG07_HUMAN
4	68	750	0.0906667	Q9BRR9	RHG09_HUMAN
4	125	1957	0.0638733	Q5T5U3	RHG21_HUMAN
4	41	622	0.0659164	Q5TG30	RHG40_HUMAN
4	34	379	0.0897098	Q8N443	RIBC1_HUMAN
4	39	401	0.0972569	Q96NA2	RILP_HUMAN
4	71	1052	0.0674905	O15034	RIMB2_HUMAN
4	61	783	0.0779055	Q13671	RIN1_HUMAN
4	50	566	0.0883392	Q6ZS11	RINL_HUMAN
4	13	219	0.0593607	Q86UA6	RIP_HUMAN
4	28	374	0.0748663	Q8TDU9	RL3R2_HUMAN
4	25	245	0.102041	Q2KHN1	RN151_HUMAN
4	43	838	0.0513126	Q9NV58	RN19A_HUMAN
4	21	227	0.092511	P52198	RND2_HUMAN
4	59	783	0.0753512	Q68DV7	RNF43_HUMAN
4	136	2480	0.0548387	Q8IWN7	RP1L1_HUMAN
4	92	2156	0.0426716	P56715	RP1_HUMAN
4	72	923	0.0780065	O95398	RPGF3_HUMAN
4	63	784	0.0803571	Q6XPR3	RPTN_HUMAN
4	81	1297	0.0624518	Q5JTH9	RRP12_HUMAN
4	19	176	0.107955	Q9NQ39	RS10L_HUMAN
4	18	165	0.109091	P46783	RS10_HUMAN
4	20	152	0.131579	P62269	RS18_HUMAN
4	32	249	0.128514	P62753	RS6_HUMAN
4	14	194	0.0721649	P62081	RS7_HUMAN
4	23	208	0.110577	P62241	RS8_HUMAN
4	15	87	0.172414	P82921	RT21_HUMAN
4	50	710	0.0704225	Q92541	RTF1_HUMAN
4	91	1358	0.0670103	A6NKG5	RTL1_HUMAN
4	46	545	0.0844037	Q8IZ73	RUSD2_HUMAN
4	52	696	0.0747126	O43304	S14L5_HUMAN
4	43	558	0.0770609	A6NKX4	S22AV_HUMAN
4	45	643	0.0699844	Q6P1M0	S27A4_HUMAN
4	47	404	0.116337	A6NKF1	SAC31_HUMAN
4	25	330	0.0757576	Q86SK9	SCD5_HUMAN
4	104	2016	0.0515873	Q14524	SCN5A_HUMAN
4	91	1988	0.0457746	Q15858	SCN9A_HUMAN
4	39	669	0.058296	P37088	SCNNA_HUMAN
4	26	201	0.129353	Q7RTU7	SCX_HUMAN
4	66	785	0.0840764	Q13275	SEM3F_HUMAN
4	83	1151	0.0721112	Q9P283	SEM5B_HUMAN
4	53	729	0.0727023	Q8TEC5	SH3R2_HUMAN
4	125	1616	0.0773515	Q13796	SHRM2_HUMAN
4	117	1804	0.0648559	O43166	SI1L1_HUMAN
4	42	529	0.0793951	Q96JF0	SIAT2_HUMAN
4	84	1042	0.0806142	Q96FS4	SIPA1_HUMAN
4	80	1101	0.0726612	Q8IY18	SMC5_HUMAN
4	39	483	0.0807453	Q6STE5	SMRD3_HUMAN
4	12	71	0.169014	Q9Y675	SNURF_HUMAN
4	73	800	0.09125	O43290	SNUT1_HUMAN
4	53	536	0.0988806	Q13573	SNW1_HUMAN
4	36	403	0.08933	Q86XE0	SNX32_HUMAN
4	36	622	0.0578778	Q9UN79	SOX13_HUMAN
4	79	1133	0.0697264	Q5TCZ1	SPD2A_HUMAN
4	32	401	0.0798005	Q96I25	SPF45_HUMAN
4	47	654	0.0718654	Q9NRA0	SPHK2_HUMAN
4	67	714	0.0938375	Q8WWL2	SPIR2_HUMAN
4	36	410	0.0878049	Q2MJR0	SPRE3_HUMAN
4	12	116	0.103448	Q9BT56	SPXN_HUMAN
4	84	1292	0.0650155	Q9BX66	SRBS1_HUMAN
4	56	272	0.205882	Q13243	SRSF5_HUMAN
4	72	1113	0.06469	Q9Y3M8	STA13_HUMAN
4	65	1023	0.0635386	Q92502	STAR8_HUMAN
4	11	55	0.2	P09430	STP1_HUMAN
4	60	885	0.0677966	Q4FZB7	SV421_HUMAN
4	56	462	0.121212	Q86Y97	SV422_HUMAN
4	51	549	0.0928962	Q2M3V2	SWAHA_HUMAN
4	71	793	0.0895334	A6NEL2	SWAHB_HUMAN
4	64	929	0.0688913	Q8N3V7	SYNPO_HUMAN
4	31	475	0.0652632	Q7L3T8	SYPM_HUMAN
4	230	3432	0.0670163	Q5T011	SZT2_HUMAN
4	64	556	0.115108	Q3SY00	T10IP_HUMAN
4	46	566	0.0812721	Q8IW70	T151B_HUMAN
4	37	517	0.0715667	P35269	T2FA_HUMAN
4	33	290	0.113793	Q9Y2B4	T53G5_HUMAN
4	97	1826	0.0531216	Q8IZX4	TAF1L_HUMAN
4	48	549	0.0874317	A6NDS4	TBC3B_HUMAN
4	26	214	0.121495	Q7RTU1	TCF23_HUMAN
4	69	1098	0.0628415	O14776	TCRG1_HUMAN
4	25	360	0.0694444	Q96QE5	TEFM_HUMAN
4	155	2774	0.055876	Q9NT68	TEN2_HUMAN
4	58	806	0.0719603	P55072	TERA_HUMAN
4	47	677	0.0694239	Q92994	TF3B_HUMAN
4	55	817	0.0673195	P22735	TGM1_HUMAN
4	25	239	0.104603	Q8WTV1	THAP3_HUMAN
4	34	309	0.110032	Q9BT49	THAP7_HUMAN
4	41	379	0.108179	Q9P2T0	THEG_HUMAN
4	98	1608	0.0609453	Q9C0I4	THS7B_HUMAN
4	20	176	0.113636	C9JI98	TM238_HUMAN
4	76	1100	0.0690909	Q7Z5M5	TMC3_HUMAN
4	46	712	0.0646067	Q7Z404	TMC4_HUMAN
4	15	159	0.0943396	Q6PEY1	TMM88_HUMAN
4	47	843	0.0557533	Q7RTY8	TMPS7_HUMAN
4	31	300	0.103333	O95407	TNF6B_HUMAN
4	53	704	0.0752841	Q12931	TRAP1_HUMAN
4	45	653	0.0689127	Q13049	TRI32_HUMAN
4	42	518	0.0810811	Q9HCM9	TRI39_HUMAN
4	57	759	0.0750988	Q7Z4K8	TRI46_HUMAN
4	81	811	0.0998767	Q7L0X0	TRIL_HUMAN
4	127	1992	0.063755	Q14669	TRIPC_HUMAN
4	54	659	0.0819423	Q9NXH9	TRM1_HUMAN
4	55	977	0.0562948	Q9UBN4	TRPC4_HUMAN
4	88	1503	0.0585496	O94759	TRPM2_HUMAN
4	93	1214	0.0766063	Q8TD43	TRPM4_HUMAN
4	116	1807	0.0641948	P49815	TSC2_HUMAN
4	41	513	0.079922	Q96NA8	TSNA1_HUMAN
4	33	414	0.0797101	Q9UJ04	TSYL4_HUMAN
4	59	873	0.067583	Q8NEE8	TTC16_HUMAN
4	46	569	0.0808436	Q5TAA0	TTC22_HUMAN
4	24	189	0.126984	A6NLP5	TTC36_HUMAN
4	40	528	0.0757576	P07101	TY3H_HUMAN
4	86	1187	0.0724516	P29597	TYK2_HUMAN
4	36	240	0.15	Q01081	U2AF1_HUMAN
4	45	507	0.0887574	Q3KQV9	UAP1L_HUMAN
4	65	1055	0.0616114	Q9UHP3	UBP25_HUMAN
4	66	1516	0.0435356	Q9NYU1	UGGG2_HUMAN
4	36	318	0.113208	Q96QD9	UIF_HUMAN
4	56	828	0.0676329	Q92738	US6NL_HUMAN
4	44	461	0.0954447	Q495M9	USH1G_HUMAN
4	29	355	0.0816901	Q86V25	VASH2_HUMAN
4	56	615	0.0910569	O15240	VGF_HUMAN
4	228	4388	0.0519599	Q5THJ4	VP13D_HUMAN
4	55	702	0.0783476	Q9H8Y1	VRTN_HUMAN
4	62	1184	0.0523649	A6NCI4	VWA3A_HUMAN
4	180	3526	0.0510493	Q8IZQ1	WDFY3_HUMAN
4	47	485	0.0969072	Q9H1Z4	WDR13_HUMAN
4	22	250	0.088	O76076	WISP2_HUMAN
4	74	1800	0.0411111	Q9BYP7	WNK3_HUMAN
4	41	365	0.112329	Q9Y6F9	WNT6_HUMAN
4	61	575	0.106087	Q658N2	WSCD1_HUMAN
4	44	633	0.0695103	P18887	XRCC1_HUMAN
4	72	959	0.0750782	Q86Y38	XYLT1_HUMAN
4	66	865	0.0763006	Q9H1B5	XYLT2_HUMAN
4	34	341	0.0997067	A8MUA0	YB057_HUMAN
4	25	172	0.145349	Q8N1X5	YF001_HUMAN
4	32	341	0.0938416	Q8N9G6	YJ012_HUMAN
4	46	424	0.108491	Q86SH2	ZAR1_HUMAN
4	65	1053	0.0617284	O95625	ZBT11_HUMAN
4	42	416	0.100962	A6NM28	ZFP92_HUMAN
4	37	837	0.0442055	Q9Y6X8	ZHX2_HUMAN
4	36	956	0.0376569	Q9H4I2	ZHX3_HUMAN
4	47	527	0.0891841	Q9NZV7	ZIM2_HUMAN
4	34	538	0.063197	Q9BRR0	ZKSC3_HUMAN
4	38	545	0.0697248	Q969J2	ZKSC4_HUMAN
4	74	722	0.102493	Q9P2Y4	ZN219_HUMAN
4	33	854	0.0386417	Q9BYN7	ZN341_HUMAN
4	47	561	0.083779	Q53GI3	ZN394_HUMAN
4	28	327	0.0856269	Q8N0Y2	ZN444_HUMAN
4	55	595	0.092437	Q7Z7K2	ZN467_HUMAN
4	43	541	0.0794824	Q8N8E2	ZN513_HUMAN
4	45	492	0.0914634	Q6ZMY9	ZN517_HUMAN
4	79	1346	0.0586924	Q9H0D2	ZN541_HUMAN
4	38	464	0.0818966	Q96BR6	ZN669_HUMAN
4	63	500	0.126	Q96CS4	ZN689_HUMAN
4	39	519	0.0751445	Q9BU19	ZN692_HUMAN
4	39	374	0.104278	Q9H7X3	ZN696_HUMAN
4	24	191	0.125654	Q9BV97	ZN747_HUMAN
4	40	408	0.0980392	Q96H86	ZN764_HUMAN
4	67	903	0.0741971	Q8N4W9	ZN808_HUMAN
4	67	531	0.126177	Q96EG3	ZN837_HUMAN
4	52	811	0.0641184	A8K0R7	ZN839_HUMAN
4	66	1043	0.063279	P17040	ZSC20_HUMAN
4	74	1185	0.0624473	Q9P217	ZSWM5_HUMAN
4	141	2961	0.047619	O43149	ZZEF1_HUMAN
4	59	903	0.0653378	Q8IYH5	ZZZ3_HUMAN
3	21	266	0.0789474	Q30167	2B1A_HUMAN
3	10	318	0.0314465	P33765	AA3R_HUMAN
3	102	2261	0.0451128	O95477	ABCA1_HUMAN
3	69	1382	0.0499276	Q96J66	ABCCB_HUMAN
3	25	439	0.0569476	Q96I13	ABHD8_HUMAN
3	32	381	0.0839895	Q8N0Z2	ABRA_HUMAN
3	36	272	0.132353	Q9ULW3	ABT1_HUMAN
3	63	834	0.0755396	Q96P50	ACAP3_HUMAN
3	38	544	0.0698529	Q96AP0	ACD_HUMAN
3	29	532	0.0545113	P08912	ACM5_HUMAN
3	30	421	0.0712589	Q86TX2	ACOT1_HUMAN
3	34	483	0.0703934	P49753	ACOT2_HUMAN
3	34	691	0.0492041	Q96QF7	ACRC_HUMAN
3	36	701	0.0513552	Q9NR19	ACSA_HUMAN
3	40	576	0.0694444	Q4G176	ACSF3_HUMAN
3	66	955	0.0691099	Q9H013	ADA19_HUMAN
3	74	1119	0.0661305	Q08828	ADCY1_HUMAN
3	51	1091	0.0467461	Q08462	ADCY2_HUMAN
3	82	1168	0.0702055	O43306	ADCY6_HUMAN
3	40	491	0.0814664	P22570	ADRO_HUMAN
3	35	714	0.0490196	Q8N302	AGGF1_HUMAN
3	55	857	0.0641774	Q9UL18	AGO1_HUMAN
3	62	860	0.072093	Q9H9G7	AGO3_HUMAN
3	45	499	0.0901804	Q16352	AINX_HUMAN
3	32	411	0.0778589	Q9UKB5	AJAP1_HUMAN
3	52	859	0.0605355	Q9Y2D5	AKAP2_HUMAN
3	23	512	0.0449219	P47895	AL1A3_HUMAN
3	28	517	0.0541586	P30837	AL1B1_HUMAN
3	25	517	0.0483559	P05091	ALDH2_HUMAN
3	130	1907	0.0681699	Q96L96	ALPK3_HUMAN
3	44	605	0.0727273	P35858	ALS_HUMAN
3	26	382	0.0680628	Q9UHK6	AMACR_HUMAN
3	64	1135	0.0563877	Q5JTC6	AMER1_HUMAN
3	51	626	0.0814696	Q86YJ7	AN13B_HUMAN
3	78	1353	0.0576497	Q8N2N9	AN36B_HUMAN
3	27	379	0.0712401	E9PGG2	ANHX_HUMAN
3	47	763	0.061599	Q8N957	ANKF1_HUMAN
3	24	360	0.0666667	Q9GZV1	ANKR2_HUMAN
3	56	782	0.0716113	A1A5B4	ANO9_HUMAN
3	74	1001	0.0739261	Q8N283	ANR35_HUMAN
3	44	751	0.0585885	P19801	AOC1_HUMAN
3	23	437	0.0526316	P05549	AP2A_HUMAN
3	24	442	0.0542986	Q6VUC0	AP2E_HUMAN
3	34	317	0.107256	P02649	APOE_HUMAN
3	68	802	0.084788	Q8IW93	ARHGJ_HUMAN
3	54	903	0.0598007	Q8TDY4	ASAP3_HUMAN
3	48	757	0.0634082	Q9H1I8	ASCC2_HUMAN
3	42	553	0.0759494	Q9BZE9	ASPC1_HUMAN
3	70	1302	0.0537634	O14525	ASTN1_HUMAN
3	106	1499	0.0707138	O60312	AT10A_HUMAN
3	86	1461	0.0588638	O94823	AT10B_HUMAN
3	61	648	0.0941358	Q5T9A4	ATD3B_HUMAN
3	34	411	0.0827251	Q5T2N8	ATD3C_HUMAN
3	45	703	0.0640114	Q99941	ATF6B_HUMAN
3	43	474	0.0907173	Q86TL0	ATG4D_HUMAN
3	107	1762	0.0607264	Q8N6G6	ATL1_HUMAN
3	106	1691	0.0626848	P82987	ATL3_HUMAN
3	25	354	0.0706215	Q92858	ATOH1_HUMAN
3	17	152	0.111842	Q8N100	ATOH7_HUMAN
3	68	1429	0.0475857	O75882	ATRN_HUMAN
3	82	1103	0.0743427	Q9H324	ATS10_HUMAN
3	110	1427	0.0770848	Q76LX8	ATS13_HUMAN
3	78	1223	0.0637776	Q8WXS8	ATS14_HUMAN
3	83	1095	0.0757991	Q8TE56	ATS17_HUMAN
3	62	1221	0.0507781	Q8TE60	ATS18_HUMAN
3	79	1207	0.0654515	Q8TE59	ATS19_HUMAN
3	100	1910	0.052356	P59510	ATS20_HUMAN
3	90	1211	0.0743187	O95450	ATS2_HUMAN
3	39	334	0.116766	Q9HB09	B2L12_HUMAN
3	34	323	0.105263	Q9NPZ5	B3GA2_HUMAN
3	28	372	0.0752688	Q9Y2A9	B3GN3_HUMAN
3	33	566	0.0583039	Q8NHY0	B4GN2_HUMAN
3	33	492	0.0670732	Q6ZNE5	BAKOR_HUMAN
3	31	593	0.0522766	Q8NFJ9	BBS1_HUMAN
3	46	835	0.0550898	Q9H165	BC11A_HUMAN
3	22	217	0.101382	Q8WUZ0	BCL7C_HUMAN
3	35	419	0.0835322	Q9Y276	BCS1_HUMAN
3	57	828	0.0688406	Q5T5X7	BEND3_HUMAN
3	48	529	0.0907372	Q6UXY1	BI2L2_HUMAN
3	56	975	0.0574359	Q96G01	BICD1_HUMAN
3	18	217	0.0829493	Q9NUP1	BL1S4_HUMAN
3	65	1417	0.0458716	P54132	BLM_HUMAN
3	37	408	0.0906863	P12644	BMP4_HUMAN
3	35	513	0.0682261	P22004	BMP6_HUMAN
3	31	431	0.0719258	P18075	BMP7_HUMAN
3	146	3046	0.0479317	Q12830	BPTF_HUMAN
3	40	766	0.0522193	P15056	BRAF_HUMAN
3	36	651	0.0552995	Q9NPI1	BRD7_HUMAN
3	24	398	0.0603015	Q96G97	BSCL2_HUMAN
3	36	526	0.0684411	Q13410	BT1A1_HUMAN
3	36	523	0.0688337	Q8WVV5	BT2A2_HUMAN
3	28	485	0.057732	Q96KE9	BTBD6_HUMAN
3	40	503	0.0795229	P19099	C11B2_HUMAN
3	61	894	0.0682327	Q2TBE0	C19L2_HUMAN
3	43	935	0.0459893	P11586	C1TC_HUMAN
3	55	978	0.0562372	Q6UB35	C1TM_HUMAN
3	58	858	0.0675991	Q5T0F9	C2D1B_HUMAN
3	8	113	0.0707965	Q8IVY1	CA210_HUMAN
3	16	126	0.126984	Q8NC38	CA213_HUMAN
3	46	633	0.0726698	Q8TDN4	CABL1_HUMAN
3	44	520	0.0846154	O00305	CACB4_HUMAN
3	59	814	0.0724816	P55291	CAD15_HUMAN
3	39	882	0.0442177	P12830	CADH1_HUMAN
3	42	785	0.0535032	Q9ULB5	CADH7_HUMAN
3	29	350	0.0828571	Q86XJ0	CAHM3_HUMAN
3	73	1489	0.0490262	Q08AD1	CAMP2_HUMAN
3	44	684	0.0643275	A8MX76	CAN14_HUMAN
3	52	1037	0.0501446	Q9BX69	CARD6_HUMAN
3	75	1288	0.0582298	A6NGG8	CB071_HUMAN
3	34	295	0.115254	A6NCS6	CB072_HUMAN
3	21	251	0.0836653	O95931	CBX7_HUMAN
3	26	242	0.107438	A6NI87	CBY3_HUMAN
3	22	294	0.0748299	Q6P1S2	CC033_HUMAN
3	33	280	0.117857	Q9BWC9	CC106_HUMAN
[truncated: 18,194 more rows]
